# Supplementary material
Source: PubMed Central journal article supplement (PMC8862118)

**Late-stage *N*-Me Selective Arylation of Trialkylamines Enabled by  
Ni/Photoredox Dual Catalysis**

Yangyang Shen, Tomislav Rovis\*

Correspondence to: [tr2504@columbia.edu](mailto:tr2504@columbia.edu)

*Department of Chemistry, Columbia University, New York, NY, 10027, USA.*

## **Table of contents**

|             |                                                                     |            |
|-------------|---------------------------------------------------------------------|------------|
| <b>I.</b>   | <b>General considerations</b>                                       | <b>S3</b>  |
| <b>II.</b>  | <b>Optimization details and H<sub>2</sub>O titration</b>            | <b>S4</b>  |
| <b>III.</b> | <b>Deuteration studies</b>                                          | <b>S7</b>  |
| <b>IV.</b>  | <b>N-Me selective arylation</b>                                     | <b>S8</b>  |
| <b>V.</b>   | <b>References</b>                                                   | <b>S23</b> |
| <b>VI.</b>  | <b><sup>1</sup>H, <sup>13</sup>C and <sup>19</sup>F NMR spectra</b> | <b>S24</b> |

## I. General considerations

Reagents: Unless otherwise noted, all reactions were carried out in reaction tubes with screw cap. Anhydrous solvents were purchased from Sigma Aldrich and used without further purification. All other reagents were purchased from commercial sources and used as received. For the pharmaceuticals received in salt form, a simple treatment with ethyl acetate and  $K_2CO_3$  (aq.) or KOH (1 M) offered pure enough sample in the organic phase for the reactions. Purification of the product was conducted manually on SiliCycle® SilicaFlash® P60 (230-400 mesh) silica gel columns. Thin layer chromatography (TLC) was performed on Silicycle 250  $\mu$ m silica gel 60 Å plates. Visualization was accomplished with UV lamp (254 nm),  $KMnO_4$  or Iodine. A Kessil blue LED (34W maximum, 24 VDC, 440 nm) was used as the light source for the photoredox catalyzed reactions. The procedures described in this section are representative. Thus, the yields may differ slightly from those given in the tables of the manuscript.

Analytical Methods:  $^1H$  NMR,  $^{13}C$  NMR and  $^{19}F$  NMR spectra are included for all new compounds.  $^1H$  NMR,  $^{13}C$  NMR and  $^{19}F$  NMR spectra were recorded on Varian 300/400 MHz or Bruker 400/500 MHz at ambient temperature. All  $^1H$  NMR spectra are reported in parts per million (ppm) downfield of TMS and were measured relative to the signals for  $CHCl_3$  (7.26 ppm). All  $^{13}C$  NMR spectra were reported in ppm relative to residual  $CHCl_3$  (77.16 ppm) and were obtained with  $^1H$  decoupling. Coupling constants,  $J$ , are reported in hertz (Hz). In the case of diastereomeric mixtures, isolated NMR was recorded to determine the ratio. High resolution mass spectra (HRMS) were obtained from the Columbia University Chemistry Department Mass Spectrometry Facility on a Waters XEVO G2XS QToF mass spectrometer equipped with a UPC2 SFC inlet and a LockSpray source with one of the following three probes: electrospray ionization (ESI) probe, atmospheric pressure chemical ionization (APCI) probe, or atmospheric pressure solids analysis probe (ASAP).

## II. Optimization details and control experiments

**Table S1. Screening of Ni-catalysts**

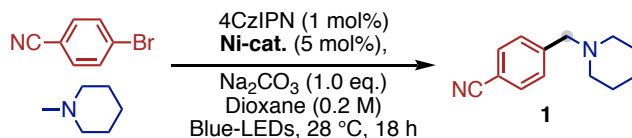

| entry | Ni-cat.                                                           | Conv. (%) | Ar-H (%) <sup>a</sup> | <b>1</b> (%) <sup>a</sup> |
|-------|-------------------------------------------------------------------|-----------|-----------------------|---------------------------|
| 1     | <b>Ni-1</b>                                                       | 100       | 12                    | 49                        |
| 2     | Ni(COD) <sub>2</sub> <sup>b</sup>                                 | 100       | 27                    | 5                         |
| 3     | NiCl <sub>2</sub> (H <sub>2</sub> O) <sub>6</sub> <sup>b</sup>    | 100       | 19                    | 48                        |
| 4     | Ni(OAc) <sub>2</sub> (H <sub>2</sub> O) <sub>4</sub> <sup>b</sup> | 20        | 12                    | 4                         |
| 5     | Ni(acac) <sub>2</sub> <sup>b</sup>                                | 100       | 36                    | 45                        |
| 6     | Ni(PPh <sub>3</sub> )Cl <sub>2</sub> <sup>b</sup>                 | 83        | 17                    | 40                        |

0.2 mmol scale, amine (2.0 equiv), mass balance accounts for homocoupling of ArBr. <sup>a</sup> GC-MS yield with ethyl benzoate as internal standard. <sup>b</sup> dtbbpy (6 mol%) as ligand.

**Table S2. Screening of Bases**

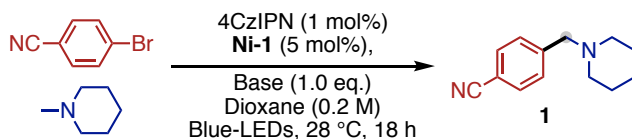

| entry | Base                            | Conv. (%) | Ar-H (%) <sup>a</sup> | <b>1</b> (%) <sup>a</sup> |
|-------|---------------------------------|-----------|-----------------------|---------------------------|
| 1     | Na <sub>2</sub> CO <sub>3</sub> | 100       | 12                    | 49                        |
| 2     | K <sub>2</sub> CO <sub>3</sub>  | 100       | 12                    | 44                        |
| 3     | Cs <sub>2</sub> CO <sub>3</sub> | 100       | 11                    | 43                        |
| 4     | NaHCO <sub>3</sub>              | 83        | 7                     | 40                        |
| 5     | K <sub>2</sub> HPO <sub>4</sub> | 100       | 16                    | 44                        |
| 6     | K <sub>3</sub> PO <sub>4</sub>  | 100       | 12                    | 46                        |
| 7     | DABCO                           | 48        | 11                    | 15                        |
| 8     | 2,4,6-Collidine                 | 100       | 4                     | 43                        |
| 9     | Barton's base                   | 100       | 10                    | 33                        |
| 10    | LiOPiv                          | 100       | 39                    | 47                        |
| 11    | NaOPiv                          | 100       | 94                    | 5                         |
| 12    | CsOPiv                          | 100       | 96                    | 4                         |
| 13    | NaO <sub>2</sub> CAd            | 100       | 86                    | 11                        |
| 14    | KO <sub>2</sub> CAd             | 100       | 91                    | 6                         |
| 15    | CsO <sub>2</sub> CAd            | 100       | 83                    | 8                         |

0.2 mmol scale, amine (2.0 equiv), mass balance accounts for homocoupling of ArBr. <sup>a</sup> GC-MS yield with ethyl benzoate as internal standard.

**Table S3. H<sub>2</sub>O Titration**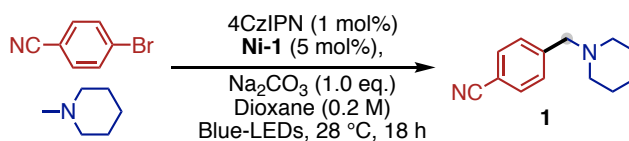

| entry | H <sub>2</sub> O (x eq.) as add. | Conv. (%) | Ar-H (%) <sup>a</sup> | <b>1</b> (%) <sup>a</sup> |
|-------|----------------------------------|-----------|-----------------------|---------------------------|
| 1     | 0                                | 100       | 12                    | 49                        |
| 2     | 5                                | 100       | 16                    | 38                        |
| 3     | 10                               | 100       | 31                    | 38                        |
| 4     | 20                               | 100       | 59                    | 29                        |
| 5     | 50                               | 100       | 90                    | 3                         |
| 6     | 100                              | 55        | 54                    | 0                         |
| 7     | 200                              | 81        | 77                    | 0                         |

0.2 mmol scale, amine (2.0 equiv), mass balance accounts for homocoupling of ArBr. <sup>a</sup> GC-MS yield with ethyl benzoate as internal standard.

**Table S4. Conditions for Hindered Amine Substrate**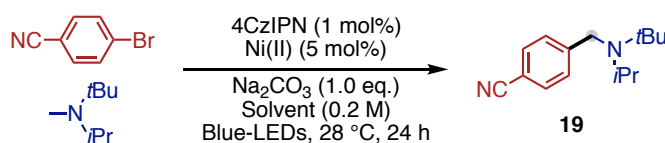

| entry            | Ni-cat.                                           | Solvent | Ar-H (%) <sup>a</sup> | <b>19</b> (%) <sup>a</sup> |
|------------------|---------------------------------------------------|---------|-----------------------|----------------------------|
| 1                | <b>Ni-1</b>                                       | DME     | 13                    | 4                          |
| 2 <sup>b</sup>   | Ni(TMHD) <sub>2</sub>                             | DMA     | 16                    | 25                         |
| 3 <sup>c</sup>   | NiCl <sub>2</sub> (H <sub>2</sub> O) <sub>6</sub> | ACN     | 12                    | 90 (86) <sup>d</sup>       |
| 4 <sup>c</sup>   | NiCl <sub>2</sub> (H <sub>2</sub> O) <sub>6</sub> | Dioxane | 12                    | 62                         |
| 5 <sup>b,c</sup> | NiCl <sub>2</sub> (H <sub>2</sub> O) <sub>6</sub> | DMA     | 21                    | 30                         |
| 6 <sup>b,c</sup> | NiCl <sub>2</sub> (H <sub>2</sub> O) <sub>6</sub> | DMF     | 35                    | 53                         |

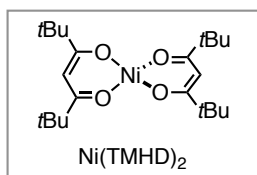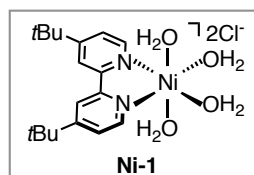

0.2 mmol scale, amine (2.0 equiv), mass balance accounts for homocoupling of ArBr, full conversion. <sup>a</sup> GC-MS yield with ethyl benzoate as inter standard. <sup>b</sup> Dimerization of amine was detected. <sup>c</sup> 10 mol% of dipivaloyl methane was used as ligand. <sup>d</sup> isolated yield.

**Table S5. Ratio and Concentration of Starting Materials**

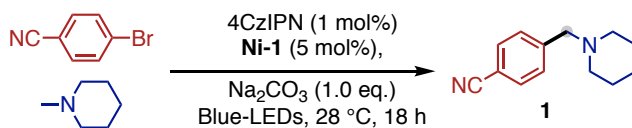

| entry          | amine: ArBr | Dioxane | Ar-H (%) <sup>a</sup> | <b>1</b> (%) <sup>a</sup> |
|----------------|-------------|---------|-----------------------|---------------------------|
| 1              | 2: 1        | 0.2 M   | 12                    | 49 (50) <sup>b</sup>      |
| 2              | 1: 1        | 0.2 M   | 23                    | 33                        |
| 3              | 2: 1        | 0.1 M   | 25                    | 46                        |
| 4              | 2: 1        | 0.067 M | 28                    | 44                        |
| 5 <sup>c</sup> | 2: 1        | 0.05 M  | 29                    | 43                        |

0.2 mmol scale, amine (2.0 equiv), full conversion of ArBr, mass balance accounts for homocoupling of ArBr. <sup>a</sup> GC-MS yield with ethyl benzoate as inter standard. <sup>b</sup> isolated yield. <sup>c</sup> 87% conversion.

**Table S6. Photocatalysts Screening**

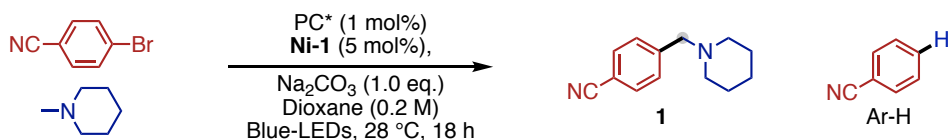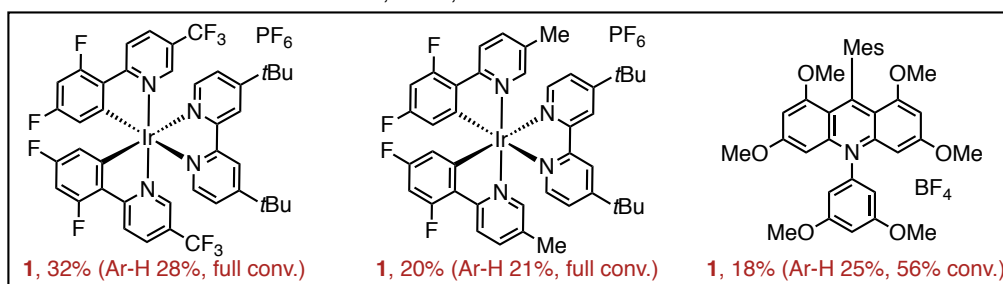

0 < yield < 10%, < 20% conversion

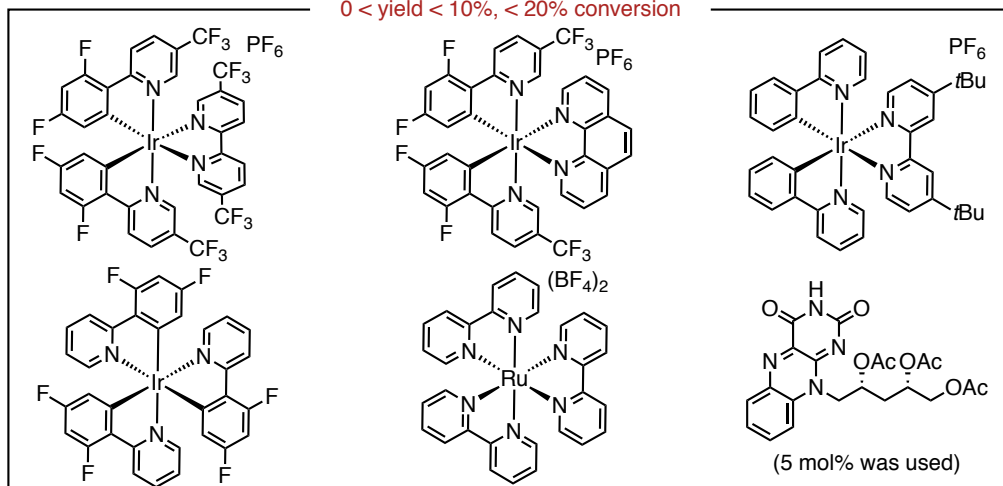

0.2 mmol scale, amine (2.0 equiv), mass balance accounts for homocoupling of ArBr. <sup>a</sup> GC-MS yield with ethyl benzoate as inter standard.

### III. Deuteration studies

$\alpha$ - and  $\beta$ - deuterated tributylamines were synthesized according to reported literatures.<sup>1-3</sup>

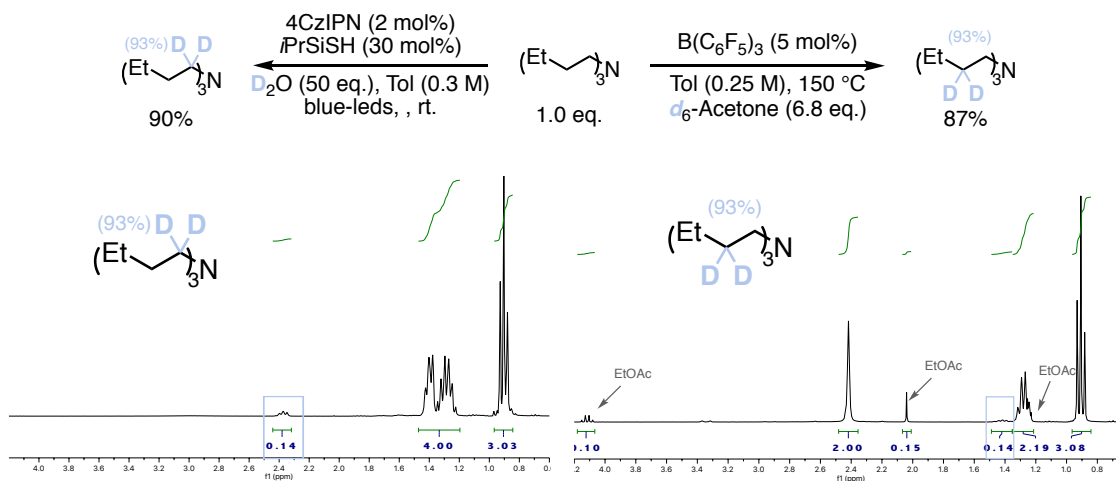

Figure S1. Synthesis of deuterated tributylamine

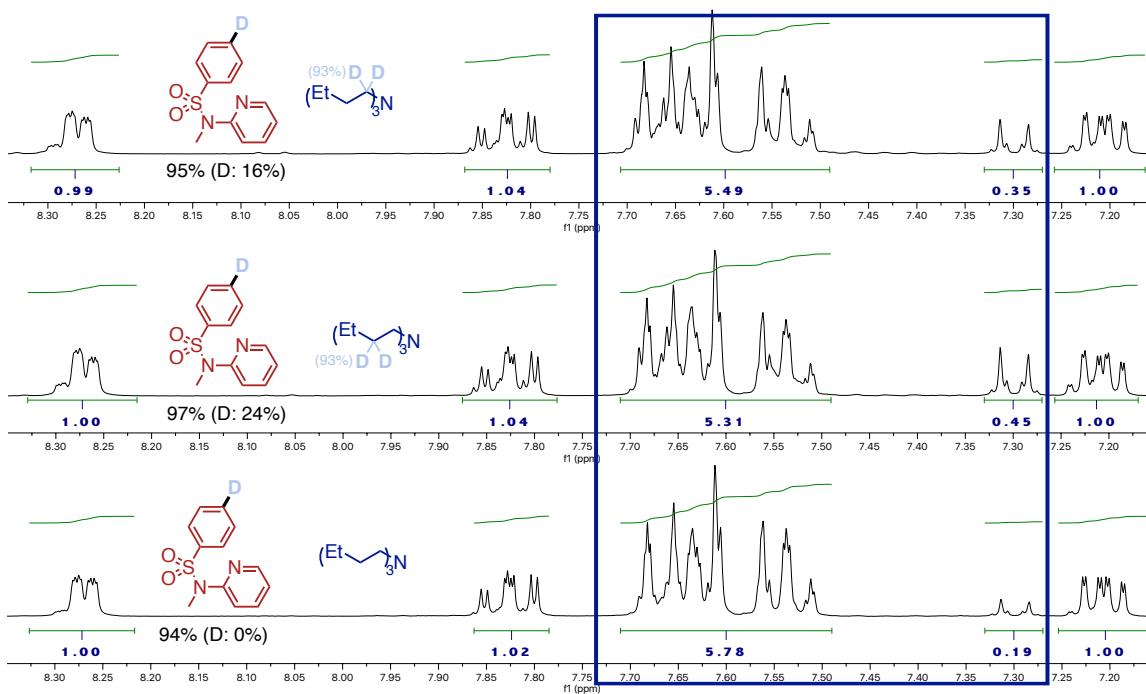

Figure S2.  $^1H$ -NMR of hydrodebromination with tributylamine

#### IV. *N*-Me selective arylation

**General Procedure A for the *N*-Me arylation of simple trialkylamines.** A 8.0 mL disposable borosilicate glass tube with screw cap containing a stir bar was charged with 4CzIPN (1 mol%, 1.6 mg, 0.002 mmol), NiCl<sub>2</sub>(dtbbpy)(H<sub>2</sub>O)<sub>4</sub> (5 mol%, 4.7 mg, 0.01 mmol), Na<sub>2</sub>CO<sub>3</sub> (21.2 mg, 0.2 mmol), trialkylamine (0.4 mmol, added after solvent if volatile) and aryl bromide (0.2 mmol, added after solvent if liquid). The tube was transferred to a nitrogen-filled glove-box where the dry 1,4-Dioxane (1.0 mL, 0.2 M) was added. Then the reaction was stirred for 1 minute and transferred outside, placing ~10 cm away from a Kessil blue LED (34W maximum, 24 VDC, 440 nm) and vigorously stirred for 18h with cooling by fan. After completion of the reaction, the mixture was filter through a short pad of celite and purified by flash column chromatography on silica gel with EtOAc/Hexane.

*Note: for the arylation of complex trialkylamines, the reaction scale is 0.1 mmol in Dioxane (0.1 M) for 24h.*

**General Procedure B for the *N*-Me arylation of sterically hindered trialkylamines.** A 8.0 mL disposable borosilicate glass tube with screw cap containing a stir bar was charged with 4CzIPN (1 mol%, 1.6 mg, 0.002 mmol), NiCl<sub>2</sub>(H<sub>2</sub>O)<sub>6</sub> (5 mol%, 2.4 mg, 0.01 mmol), Na<sub>2</sub>CO<sub>3</sub> (21.2 mg, 0.2 mmol) and aryl bromide (0.2 mmol, added after solvent if liquid). The tube was transferred to a nitrogen-filled glove-box where the dry 1,4-Dioxane (1.0 mL, 0.2 M), *N*-isopropyl-*N*-methyl-*tert*-butylamine (0.4 mmol, 67.4 μL) and dipivaloylmethane (10 mol%, 4.2 μL, 0.02 mmol) were added. Then the reaction was stirred for 1 minute and transferred outside, placing ~10 cm away from a Kessil blue LED (34W maximum, 24 VDC, 440 nm) and vigorously stirred for 18h with cooling by fan. After completion of the reaction, the mixture was filter through a short pad of celite and purified by flash column chromatography on silica gel with EtOAc/Hexane.

*Both <sup>1</sup>H-NMR and <sup>13</sup>C-NMR of Products 1<sup>6</sup>, 3<sup>11e</sup> and 4<sup>6</sup> are in good consistency with reported data in literatures.*

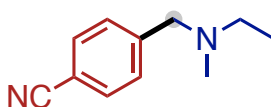

**4-((ethyl(methyl)amino)methyl)benzonitrile (2).** Following the general procedure A, the



title compound was obtained in 72% yield (25.1 mg) as colorless oil.  $^1\text{H}$  NMR (400 MHz,  $\text{CDCl}_3$ )  $\delta$  7.60 (d,  $J = 8.3$  Hz, 2H), 7.44 (d,  $J = 8.3$  Hz, 2H), 3.52 (s, 2H), 2.45 (q,  $J = 7.1$  Hz, 2H), 2.18 (s, 3H), 1.09 (t,  $J = 7.1$  Hz, 3H).  $^{13}\text{C}$  NMR (101 MHz,  $\text{CDCl}_3$ )  $\delta$  145.46, 132.21, 129.57, 119.15, 110.87, 61.66, 51.56, 41.87, 12.58. HRMS *calcd.* for  $\text{C}_{11}\text{H}_{14}\text{N}_2$   $[\text{M}+\text{H}]^+$ : 175.1235, *found* 175.1246.

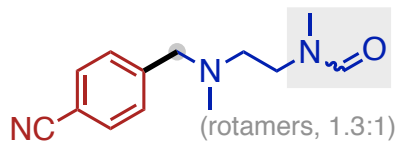

***N*-(2-((4-cyanobenzyl)(methyl)amino)ethyl)-*N*-methylformamide (5).** Following the general procedure A, the title compound was obtained in 78% yield (36.1 mg) as colorless oil.  $^1\text{H}$  NMR (400 MHz,  $\text{CDCl}_3$ )  $\delta$  [8.01 (s) + 8.00(s), 1H], 7.58-7.55 (m, 2H), 7.41-7.36 (m, 2H), [3.56 (s) + 3.55 (s), 2H], [3.46 (t,  $J = 6.5$  Hz, 0.88H) + 3.29 (t,  $J = 6.0$  Hz, 1.12H)], [2.92 (s, 1.3H) + 2.74 (s, 1.7H)], [2.55 (t,  $J = 6.5$  Hz, 0.9H) + 2.49 (t,  $J = 6.0$  Hz, 1.1H)], [2.22 (s) + 2.21 (s), 3H].  $^{13}\text{C}$  NMR (101 MHz,  $\text{CDCl}_3$ )  $\delta$  (163.03, 162.67), (144.85, 144.61), (132.26, 132.13), (129.42, 129.31), (118.96, 118.87), (111.08, 110.91), (62.30, 61.77), (54.75, 54.21), (47.54, 42.32), (41.91, 35.00), (29.86, 29.71). HRMS *calcd.* for  $\text{C}_{13}\text{H}_{17}\text{N}_3\text{O}$   $[\text{M}+\text{H}]^+$ : 232.1450, *found* 232.1462.

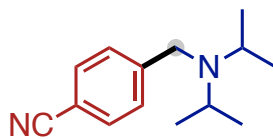

**4-((diisopropylamino)methyl)benzonitrile (6).** Following the general procedure A, the title compound was obtained in 77% yield (33.3 mg) as colorless oil.  $^1\text{H}$  NMR (400 MHz,  $\text{CDCl}_3$ )  $\delta$  7.59 (d,  $J = 8.3$  Hz, 2H), 7.52 (d,  $J = 8.1$  Hz, 2H), 3.71 (s, 2H), 3.02 (m, 2H), 1.04 (d,  $J = 6.6$  Hz, 12H).  $^{13}\text{C}$  NMR (101 MHz,  $\text{CDCl}_3$ )  $\delta$  149.78, 132.03, 128.52, 119.43, 110.07, 49.14, 48.59, 20.89. HRMS *calcd.* for  $\text{C}_{14}\text{H}_{20}\text{N}_2$   $[\text{M}+\text{H}]^+$ : 217.1705, *found* 217.1717.

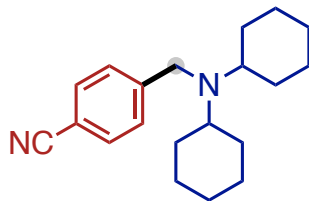

**4-((dicyclohexylamino)methyl)benzonitrile (7)**. Following the general procedure A, the title compound was obtained in 75% yield (44.5 mg) as colorless oil.  $^1\text{H}$  NMR (400 MHz,  $\text{CDCl}_3$ )  $\delta$  7.55 (d,  $J = 8.3$  Hz, 2H), 7.48 (d,  $J = 8.3$  Hz, 2H), 3.78 (s, 2H), 2.53-2.47 (m, 2H), 1.75-1.55 (m, 10H), 1.27-0.97 (m, 10 H).  $^{13}\text{C}$  NMR (101 MHz,  $\text{CDCl}_3$ )  $\delta$  150.23, 131.99, 128.41, 119.51, 109.93, 58.32, 50.22, 32.07, 26.49, 26.32. HRMS *calcd.* for  $\text{C}_{20}\text{H}_{28}\text{N}_2$   $[\text{M}+\text{H}]^+$ : 297.2331, *found* 297.2343.

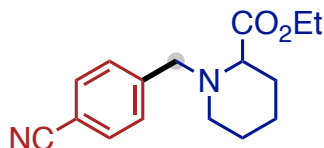

**ethyl 1-(4-cyanobenzyl)piperidine-2-carboxylate (8)**. Following the general procedure A, the title compound was obtained in 51% yield (27.8 mg) as colorless oil.  $^1\text{H}$  NMR (400 MHz,  $\text{CDCl}_3$ )  $\delta$  7.58 (d,  $J = 8.2$  Hz, 2H), 7.47 (d,  $J = 8.1$  Hz, 2H), 4.4-4.12 (m, 2H), 3.83 (d,  $J = 14.2$  Hz, 1H), 3.44 (d,  $J = 14.2$  Hz, 1H), 3.18 (dd,  $J = 7.1, 4.6$  Hz, 1H), 2.87 (dt,  $J = 10.5, 4.6$  Hz, 1H), 2.19-2.13 (m, 1H), 1.89-1.79 (m, 2H), 1.63-1.51 (m, 3H), 1.45-1.37 (m, 1H), 1.27 (t,  $J = 7.1$  Hz, 3H).  $^{13}\text{C}$  NMR (101 MHz,  $\text{CDCl}_3$ )  $\delta$  173.72, 144.90, 132.14, 129.52, 119.15, 110.88, 64.45, 60.52, 60.23, 50.25, 29.65, 25.41, 22.38, 14.43. HRMS *calcd.* for  $\text{C}_{16}\text{H}_{20}\text{N}_2\text{O}_2$   $[\text{M}+\text{H}]^+$ : 273.1603, *found* 273.1615.

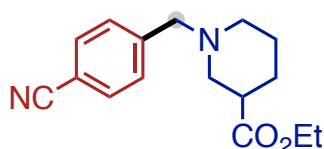

**ethyl 1-(4-cyanobenzyl)piperidine-3-carboxylate (9)**. Following the general procedure A, the title compound was obtained in 55% yield (30.0 mg) as colorless oil.  $^1\text{H}$  NMR (400 MHz,  $\text{CDCl}_3$ )  $\delta$  7.59 (d,  $J = 8.3$  Hz, 2H), 7.43 (d,  $J = 8.2$  Hz, 2H), 4.10 (qd,  $J = 7.1, 2.2$  Hz, 2H), 3.58-3.49 (m, 2H), 2.88-2.83 (m, 1H), 2.66-2.52 (m, 2H), 2.27 (t,  $J = 10.4$  Hz, 1H), 2.11-2.06 (m, 1H), 1.93-1.89 (m, 1H), 1.76-1.70 (m, 1H), 1.61-1.45 (m, 2H), 1.22 (t,  $J = 7.1$  Hz, 3H).  $^{13}\text{C}$  NMR (101 MHz,  $\text{CDCl}_3$ )  $\delta$  174.12, 144.63, 132.18, 129.44, 119.11, 110.90, 62.79, 60.44, 55.56, 53.91, 41.93, 26.85, 24.60, 14.32. HRMS *calcd.* for  $\text{C}_{16}\text{H}_{20}\text{N}_2\text{O}_2$   $[\text{M}+\text{H}]^+$ : 273.1603, *found* 273.1614.

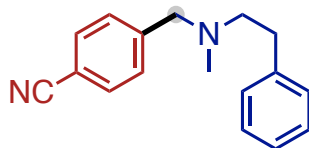

**4-((methyl(phenethyl)amino)methyl)benzonitrile (10).** Following the general procedure A, the title compound was obtained in 88% yield (44.1 mg) as colorless oil.  $^1\text{H}$  NMR (400 MHz,  $\text{CDCl}_3$ )  $\delta$  7.57-7.55 (m, 2H), 7.37-7.35 (m, 2H), 7.30-7.25 (m, 2H), 7.22-7.15 (m, 3H), 3.58 (s, 2H), 2.81 (dd,  $J = 8.8, 6.5$  Hz, 2H), 2.64 (dd,  $J = 8.8, 6.3$  Hz, 2H), 2.28 (s, 3H).  $^{13}\text{C}$  NMR (101 MHz,  $\text{CDCl}_3$ )  $\delta$  145.25, 140.35, 132.18, 129.41, 128.86, 128.47, 126.18, 119.14, 110.83, 61.92, 59.28, 42.35, 34.06. HRMS *calcd.* for  $\text{C}_{17}\text{H}_{18}\text{N}_2$   $[\text{M}+\text{H}]^+$ : 251.1548, *found* 251.1561.

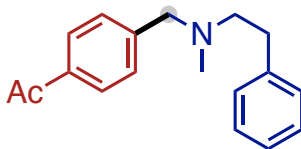

**1-(4-((methyl(phenethyl)amino)methyl)phenyl)ethan-1-one (11).** Following the general procedure A, the title compound was obtained in 68% yield (36.4 mg) as brown oil.  $^1\text{H}$  NMR (400 MHz,  $\text{CDCl}_3$ )  $\delta$  7.90 (d,  $J = 8.3$  Hz, 2H), 7.38 (d,  $J = 8.2$  Hz, 2H), 7.30-7.26 (m, 2H), 7.22-7.17 (m, 3H), 3.61 (s, 2H), 2.83 (dd,  $J = 9.3, 6.3$  Hz, 2H), 2.67 (dd,  $J = 9.2, 6.3$  Hz, 2H), 2.60 (s, 3H), 2.30 (s, 3H).  $^{13}\text{C}$  NMR (101 MHz,  $\text{CDCl}_3$ )  $\delta$  197.99, 145.06, 140.44, 136.15, 129.01, 128.84, 128.46, 126.12, 61.97, 59.32, 42.37, 34.03, 26.71. HRMS *calcd.* for  $\text{C}_{18}\text{H}_{21}\text{NO}$   $[\text{M}+\text{H}]^+$ : 268.1701, *found* 268.1718.

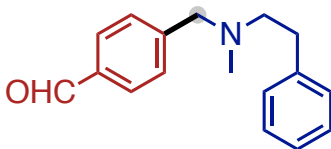

**4-((methyl(phenethyl)amino)methyl)benzaldehyde (12).** Following the general procedure A, the title compound was obtained in 70% yield (35.5 mg) as brown oil.  $^1\text{H}$  NMR (400 MHz,  $\text{CDCl}_3$ )  $\delta$  9.99 (s, 1H), 7.81 (d,  $J = 8.2$  Hz, 2H), 7.45 (d,  $J = 8.0$  Hz, 2H), 7.30-7.26 (m, 2H), 7.22-7.17 (m, 3H), 3.63 (s, 2H), 2.83 (dd,  $J = 9.3, 6.1$  Hz, 2H), 2.67 (dd,  $J = 9.0, 6.2$  Hz, 2H), 2.30 (s, 3H).  $^{13}\text{C}$  NMR (101 MHz,  $\text{CDCl}_3$ )  $\delta$  192.16, 146.86, 140.46, 135.60, 129.91, 129.42, 128.88, 128.49, 126.18, 62.12, 59.38, 42.43, 34.10. HRMS *calcd.* for  $\text{C}_{17}\text{H}_{19}\text{NO}$   $[\text{M}+\text{H}]^+$ : 254.1545, *found* 254.1544.

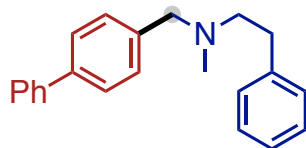

***N*-([1,1'-biphenyl]-4-ylmethyl)-*N*-methyl-2-phenylethan-1-amine (13).** Following the general procedure A, the title compound was obtained in 66% yield (39.8 mg) as colorless oil.  $^1\text{H}$  NMR (400 MHz,  $\text{CDCl}_3$ )  $\delta$  7.60-7.52 (m, 4H), 7.44-7.41 (m, 2H), 7.37-7.24 (m, 5H), 7.20-7.17 (m, 3H), 3.61 (s, 2H), 2.85 (dd,  $J = 9.5, 6.2$  Hz, 2H), 2.69 (dd,  $J = 9.5, 6.1$  Hz, 2H), 2.32 (s, 3H).  $^{13}\text{C}$  NMR (101 MHz,  $\text{CDCl}_3$ )  $\delta$  141.16, 140.61, 140.05, 138.11, 129.57, 128.91, 128.87, 128.47, 127.28, 127.19, 127.11, 126.10, 61.94, 59.28, 42.31, 34.02. HRMS *calcd.* for  $\text{C}_{22}\text{H}_{23}\text{N}$   $[\text{M}+\text{H}]^+$ : 302.1909, *found* 302.1921.

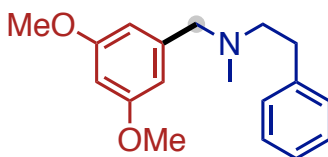

***N*-(3,5-dimethoxybenzyl)-*N*-methyl-2-phenylethan-1-amine (14).** Following the general procedure A, the title compound was obtained in 71% yield (40.5 mg) as brown oil.  $^1\text{H}$  NMR (400 MHz,  $\text{CDCl}_3$ )  $\delta$  7.28-7.25 (m, 2H), 7.19-7.16 (m, 3H), 6.47 (d,  $J = 2.3$  Hz, 2H), 6.35 (t,  $J = 2.3$  Hz, 1H), 3.76 (s, 6H), 3.49 (s, 2H), 2.82 (dd,  $J = 9.2, 6.3$  Hz, 2H), 2.65 (dd,  $J = 9.3, 6.3$  Hz, 2H), 2.29 (s, 3H).  $^{13}\text{C}$  NMR (101 MHz,  $\text{CDCl}_3$ )  $\delta$  160.85, 141.90, 140.70, 128.90, 128.42, 126.04, 106.74, 99.31, 62.53, 59.21, 55.43, 42.46, 34.02. HRMS *calcd.* for  $\text{C}_{18}\text{H}_{23}\text{NO}_2$   $[\text{M}+\text{H}]^+$ : 286.1807, *found* 286.1820.

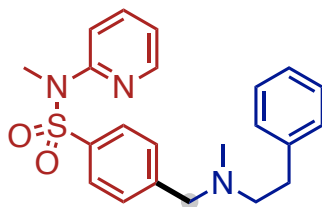

***N*-methyl-4-((methyl(phenethyl)amino)methyl)-*N*-(pyridin-2-yl)benzenesulfonamide (15).** Following the general procedure A, the title compound was obtained in 53% yield (41.9 mg) as colorless oil.  $^1\text{H}$  NMR (400 MHz,  $\text{CDCl}_3$ )  $\delta$  8.27 (dt,  $J = 4.8, 1.5$  Hz, 1H), 7.70-7.69 (m, 2H), 7.51-7.49 (m, 2H), 7.33-7.08 (m, 8H), 3.56 (s, 2H), 3.28 (s, 3H), 2.79 (dd,  $J = 8.9, 6.4$  Hz, 2H), 2.63 (dd,  $J = 9.0, 6.3$  Hz, 2H), 2.26 (s, 3H).  $^{13}\text{C}$  NMR (101 MHz,  $\text{CDCl}_3$ )  $\delta$  153.84, 148.01, 145.26, 140.35, 137.62, 135.75, 129.14, 128.83, 128.44, 127.59,

126.13, 121.12, 120.75, 61.73, 59.28, 42.36, 35.62, 34.03. HRMS *calcd.* for C<sub>22</sub>H<sub>25</sub>N<sub>3</sub>O<sub>2</sub>S [M+H]<sup>+</sup>: 396.1746, *found* 396.1785.

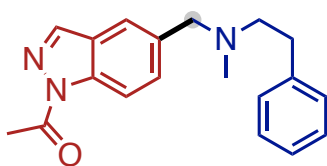

**1-(5-((methyl(phenethyl)amino)methyl)-1H-indazol-1-yl)ethan-1-one (16).** Following the general procedure A, the title compound was obtained in 57% yield (35.0 mg) as yellow oil. <sup>1</sup>H NMR (400 MHz, CDCl<sub>3</sub>) δ 8.35 (d, *J* = 8.5 Hz, 1H), 8.05 (s, 1H), 7.58 (s, 1H), 7.50 (dd, *J* = 8.6, 1.5 Hz, 1H), 7.29-7.26 (m, 2H), 7.22-7.16 (m, 3H), 3.67 (s, 2H), 2.83 (dd, *J* = 9.1, 6.4 Hz, 2H), 2.78 (s, 3H), 2.67 (dd, *J* = 9.1, 6.3 Hz, 2H), 2.31 (s, 3H). <sup>13</sup>C NMR (101 MHz, CDCl<sub>3</sub>) δ 171.00, 140.44, 139.75, 138.41, 135.82, 130.77, 128.78, 128.34, 126.52, 126.00, 120.62, 115.21, 61.95, 59.06, 42.15, 33.94, 23.00. HRMS *calcd.* for C<sub>19</sub>H<sub>21</sub>N<sub>3</sub>O [M+H]<sup>+</sup>: 308.1763, *found* 308.1777.

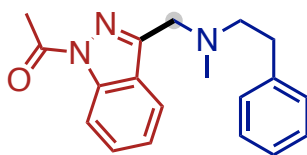

**1-(3-((methyl(phenethyl)amino)methyl)-1H-indazol-1-yl)ethan-1-one (17).** Following the general procedure A, the title compound was obtained in 53% yield (32.6 mg) as yellow oil. <sup>1</sup>H NMR (400 MHz, CDCl<sub>3</sub>) δ 8.40 (d, *J* = 8.4 Hz, 1H), 7.72 (d, *J* = 8.0 Hz, 1H), 7.51 (ddd, *J* = 8.3, 7.1, 1.1 Hz, 1H), 7.29-7.24 (m, 3H), 7.21-7.17 (m, 3H), 3.92 (s, 2H), 2.89 (dd, *J* = 8.9, 5.8 Hz, 2H), 2.80-2.76 (m, 5H), 2.36 (s, 3H). <sup>13</sup>C NMR (101 MHz, CDCl<sub>3</sub>) δ 171.08, 150.07, 140.41, 140.09, 129.47, 128.85, 128.49, 126.15, 126.10, 124.27, 121.60, 115.59, 59.51, 54.70, 42.56, 33.98, 23.24. HRMS *calcd.* for C<sub>19</sub>H<sub>21</sub>N<sub>3</sub>O [M+H]<sup>+</sup>: 308.1763, *found* 308.1783.

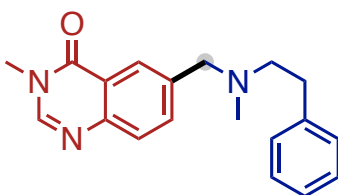

**3-methyl-6-((methyl(phenethyl)amino)methyl)quinazolin-4(3H)-one (18).** Following the general procedure A, the title compound was obtained in 40% yield (24.6 mg) as brown

oil.  $^1\text{H}$  NMR (400 MHz,  $\text{CDCl}_3$ )  $\delta$  8.20 (d,  $J = 1.5$  Hz, 1H), 8.01 (s, 1H), 7.72 (dd,  $J = 8.4$ , 1.9 Hz, 0H), 7.63 (d,  $J = 8.3$  Hz, 1H), 7.29-7.25 (m, 2H), 7.20-7.16 (m, 3H), 3.67 (s, 2H), 3.03 (s, 3H), 2.83 (dd,  $J = 9.3$ , 6.2 Hz, 1H), 2.68 (dd,  $J = 9.2$ , 6.1 Hz, 1H), 2.29 (s, 3H).  $^{13}\text{C}$  NMR (101 MHz,  $\text{CDCl}_3$ )  $\delta$  161.73, 147.63, 146.56, 140.52, 139.13, 135.23, 128.85, 128.45, 127.63, 126.31, 126.10, 121.73, 61.81, 59.32, 42.25, 34.15, 34.10. HRMS *calcd.* for  $\text{C}_{19}\text{H}_{21}\text{N}_3\text{O}$   $[\text{M}+\text{H}]^+$ : 308.1763, *found* 308.1790.

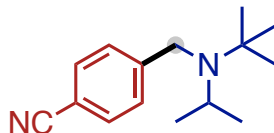

**4-((*tert*-butyl(isopropyl)amino)methyl)benzonitrile (19).** Following the general procedure B, the title compound was obtained in 86% yield (39.6 mg) as colorless oil.  $^1\text{H}$  NMR (400 MHz,  $\text{CDCl}_3$ )  $\delta$  7.56-7.51 (m, 4H), 3.79 (s, 2H), 3.50 (hept,  $J = 6.6$  Hz, 1H), 1.05 (s, 9H), 0.99 (d,  $J = 6.6$  Hz, 6H).  $^{13}\text{C}$  NMR (101 MHz,  $\text{CDCl}_3$ )  $\delta$  152.77, 131.89, 131.87, 127.65, 119.53, 109.47, 55.88, 47.01, 46.14, 28.93, 22.46. HRMS *calcd.* for  $\text{C}_{15}\text{H}_{22}\text{N}_2$   $[\text{M}+\text{H}]^+$ : 231.1861, *found* 231.1874.

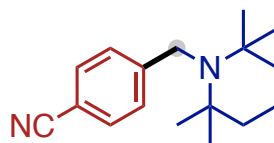

**4-((2,2,6,6-tetramethylpiperidin-1-yl)methyl)benzonitrile (20).** Following the general procedure B, the title compound was obtained in 91% yield (46.6 mg) as white solid.  $^1\text{H}$  NMR (400 MHz,  $\text{CDCl}_3$ )  $\delta$  7.58-7.53 (m, 4H), 3.83 (s, 2H), 1.62 (br, 2H), 1.54-1.51 (d,  $J = 10.8$  Hz, 4H), 0.97 (s, 12H).  $^{13}\text{C}$  NMR (101 MHz,  $\text{CDCl}_3$ )  $\delta$  152.33, 131.80, 127.57, 119.56, 109.35, 55.01, 48.16, 41.28, 17.84. HRMS *calcd.* for  $\text{C}_{17}\text{H}_{24}\text{N}_2$   $[\text{M}+\text{H}]^+$ : 257.2018, *found* 257.2024.

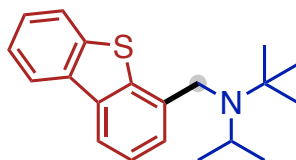

***N*-(dibenzo[*b,d*]thiophen-4-ylmethyl)-*N*-isopropyl-2-methylpropan-2-amine (21).** Following the general procedure B, the title compound was obtained in 61% yield (38.0 mg) as yellow oil.  $^1\text{H}$  NMR (400 MHz,  $\text{CDCl}_3$ )  $\delta$  8.18-8.16 (m, 1H), 8.02 (d,  $J = 7.8$  Hz, 1H), 7.92-7.89 (m, 1H), 7.77 (d,  $J = 7.4$  Hz, 1H), 7.48-7.45 (m, 3H), 4.01 (s, 2H), 3.60

(hept,  $J = 6.7$  Hz, 1H), 1.17 (s, 9H), 1.10 (d,  $J = 6.6$  Hz, 6H).  $^{13}\text{C}$  NMR (101 MHz,  $\text{CDCl}_3$ )  $\delta$  140.30, 139.79, 136.49, 136.04, 135.54, 126.50, 125.60, 124.58, 124.34, 122.88, 121.66, 119.23, 56.06, 47.32, 45.40, 28.71, 22.45. HRMS *calcd.* for  $\text{C}_{20}\text{H}_{25}\text{NS}$   $[\text{M}+\text{H}]^+$ : 312.1786, *found* 312.1783.

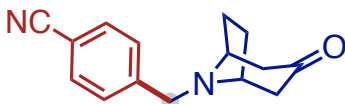

**4-(((1R,5S)-3-oxo-8-azabicyclo[3.2.1]octan-8-yl)methyl)benzotrile (22).** Following the general procedure A, the title compound was obtained in 61% yield (29.3 mg) as brown oil.  $^1\text{H}$  NMR (400 MHz,  $\text{CDCl}_3$ )  $\delta$  7.63-7.53 (m, 4H), 3.79 (s, 2H), 3.45 (d,  $J = 5.3$  Hz, 2H), 2.66 (dd,  $J = 16.0, 4.4$  Hz, 2H), 2.22 (d,  $J = 15.9$  Hz, 2H), 2.16-2.03 (m, 2H), 1.65 (d,  $J = 7.9$  Hz, 2H).  $^{13}\text{C}$  NMR (101 MHz,  $\text{CDCl}_3$ )  $\delta$  209.63, 145.22, 132.34, 129.02, 118.98, 111.08, 59.03, 55.19, 48.47, 27.89. HRMS *calcd.* for  $\text{C}_{15}\text{H}_{16}\text{N}_2\text{O}$   $[\text{M}+\text{H}]^+$ : 241.1341, *found* 241.1345.

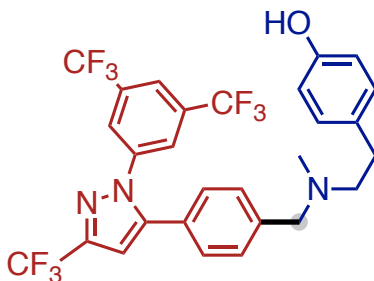

**4-(2-((4-(1-(3,5-bis(trifluoromethyl)phenyl)-3-(trifluoromethyl)-1H-pyrazol-5-yl)benzyl)(methyl)amino)ethyl)phenol (23).** Following the general procedure A (0.1 mmol scale), the title compound was obtained in 74% yield (43.4 mg) as colorless oil.  $^1\text{H}$  NMR (400 MHz,  $\text{CDCl}_3$ )  $\delta$  7.83 (s, 1H), 7.78 (s, 2H), 7.35 (d,  $J = 8.1$  Hz, 2H), 7.16 (d,  $J = 8.2$  Hz, 2H), 7.01 (d,  $J = 8.5$  Hz, 2H), 6.79 (s, 1H), 6.71 (d,  $J = 8.5$  Hz, 2H), 3.62 (s, 2H), 2.77 (dd,  $J = 9.6, 5.9$  Hz, 2H), 2.65 (dd,  $J = 9.6, 5.8$  Hz, 2H), 2.27 (s, 3H).  $^{13}\text{C}$  NMR (101 MHz,  $\text{CDCl}_3$ )  $\delta$  154.34, 145.35, 144.72 (q,  $J = 38.9$  Hz), 140.37, 132.73 (q,  $J = 34.2$  Hz), 131.98, 130.07, 129.90, 129.00, 127.18, 125.10, 125.06, 122.65 (q,  $J = 273.0$  Hz), 121.65, 121.03 (q,  $J = 269.3$  Hz), 115.50, 106.93, 61.69, 59.53, 41.77, 32.82.  $^{19}\text{F}$  NMR (376 MHz,  $\text{CDCl}_3$ )  $\delta$  -62.55, -63.15. HRMS *calcd.* for  $\text{C}_{28}\text{H}_{22}\text{N}_3\text{OF}_9$   $[\text{M}+\text{H}]^+$ : 588.1697, *found* 588.1683.

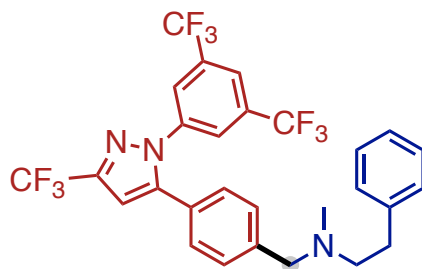

**N-(4-(1-(3,5-bis(trifluoromethyl)phenyl)-3-(trifluoromethyl)-1H-pyrazol-5-yl)benzyl)-N-methyl-2-phenylethan-1-amine (24).** Following the general procedure A (0.1 mmol scale), the title compound was obtained in 84% yield (48.0 mg) as colorless oil. <sup>1</sup>H NMR (400 MHz, CDCl<sub>3</sub>) δ 7.82 (s, 1H), 7.78 (s, 2H), 7.32 (d, *J* = 8.1 Hz, 2H), 7.28-7.24 (m, 2H), 7.20-7.13 (m, 5H), 6.78 (s, 1H), 3.58 (s, 2H), 2.85-2.81 (m, 2H), 2.66 (dd, *J* = 9.0, 6.3 Hz, 2H), 2.26 (s, 3H). <sup>13</sup>C NMR (101 MHz, CDCl<sub>3</sub>) δ 145.49, 144.74 (q, *J* = 38.9 Hz), 141.81, 140.53, 140.47, 132.77 (q, *J* = 34.1 Hz), 129.75, 128.95, 128.89, 128.46, 126.97, 126.15, 125.10, 122.69 (q, *J* = 273.2 Hz), 121.61, 121.07 (q, *J* = 269.2 Hz), 106.90, 61.83, 59.38, 42.04, 34.10. <sup>19</sup>F NMR (376 MHz, CDCl<sub>3</sub>) δ -62.57, -63.17. HRMS *calcd.* for C<sub>28</sub>H<sub>22</sub>N<sub>3</sub>F<sub>9</sub> [M+H]<sup>+</sup>: 572.1748, *found* 572.1742.

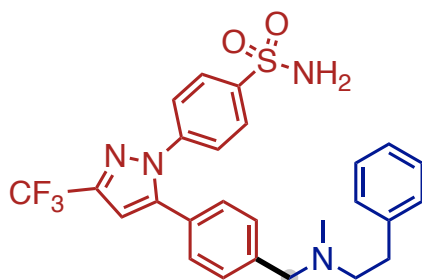

**4-(5-(4-((methyl(phenethyl)amino)methyl)phenyl)-3-(trifluoromethyl)-1H-pyrazol-1-yl)benzenesulfonamide (25).** Following the general procedure A (0.1 mmol scale), the title compound was obtained in 65% yield (33.4 mg) as brown oil. <sup>1</sup>H NMR (400 MHz, CDCl<sub>3</sub>) δ 7.86 (d, *J* = 8.8 Hz, 1H), 7.44 (d, *J* = 8.8 Hz, 1H), 7.30-7.25 (m, 4H), 7.20-7.14 (m, 5H), 6.76 (s, 1H), 5.14 (br, 1H), 3.57 (s, 2H), 2.81 (dd, *J* = 9.2, 6.2 Hz, 2H), 2.66 (dd, *J* = 9.3, 6.2 Hz, 2H), 2.29 (s, 3H). <sup>13</sup>C NMR (101 MHz, CDCl<sub>3</sub>) δ 145.20, 144.25 (q, *J* = 38.6 Hz), 142.56, 141.66, 140.87, 140.34, 129.70, 128.90, 128.84, 128.52, 127.59, 127.43, 126.22, 125.60, 121.16 (q, *J* = 269.3 Hz), 106.64, 61.72, 59.27, 42.31, 33.86. <sup>19</sup>F NMR (376 MHz, CDCl<sub>3</sub>) δ -62.39. HRMS *calcd.* for C<sub>26</sub>H<sub>25</sub>N<sub>4</sub>O<sub>2</sub>SF<sub>3</sub> [M+H]<sup>+</sup>: 515.1729, *found* 515.1731.



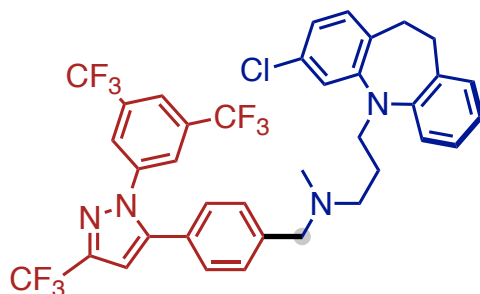

***N*-(4-(1-(3,5-bis(trifluoromethyl)phenyl)-3-(trifluoromethyl)-1*H*-pyrazol-5-yl)benzyl)-3-(3-chloro-10,11-dihydro-5*H*-dibenzo[*b,f*]azepin-5-yl)-*N*-methylpropan-1-amine (26)**. Following the general procedure A (0.1 mmol scale), the title compound was obtained in 68% yield (50.1 mg) as yellow oil. <sup>1</sup>H NMR (400 MHz, CDCl<sub>3</sub>) δ 7.84 (s, 1H), 7.79 (s, 2H), 7.29-7.27 (m, 2H), 7.16-7.05 (m, 6H), 6.97-6.94 (m, 2H), 6.85 (dd, *J* = 8.1, 2.1 Hz, 1H), 6.80 (s, 1H), 3.77 (t, *J* = 6.7 Hz, 2H), 3.47 (s, 2H), 3.10-3.03 (m, 4H), 2.44 (t, *J* = 6.6 Hz, 2H), 2.12 (s, 3H), 1.80-1.74 (m, 2H). <sup>13</sup>C NMR (101 MHz, CDCl<sub>3</sub>) δ 149.21, 148.01, 145.45, 144.74 (q, *J* = 38.9 Hz), 140.46, 135.24, 132.75 (q, *J* = 34.1 Hz), 131.69, 131.63, 131.32, 129.74, 129.57, 128.94, 126.95, 126.70, 125.10, 123.37, 122.69 (q, *J* = 273.1 Hz), 122.07, 121.64, 121.07 (q, *J* = 269.5 Hz), 120.68, 119.96, 106.84, 61.98, 55.10, 48.75, 41.98, 32.35, 31.68, 25.76. <sup>19</sup>F NMR (376 MHz, CDCl<sub>3</sub>) δ -62.53, -63.13. HRMS *calcd.* for C<sub>37</sub>H<sub>30</sub>N<sub>4</sub>ClF<sub>9</sub> [M+H]<sup>+</sup>: 737.2094, *found* 737.2083.

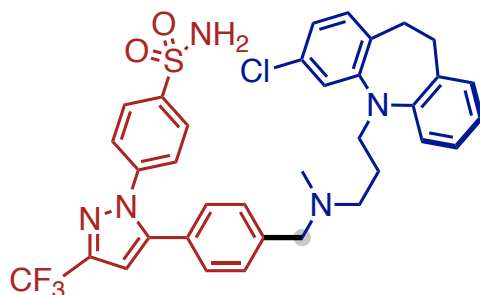

**4-(5-(4-(((3-(3-chloro-10,11-dihydro-5*H*-dibenzo[*b,f*]azepin-5-yl)propyl)(methyl)amino)methyl)phenyl)-3-(trifluoromethyl)-1*H*-pyrazol-1-yl)benzenesulfonamide (27)**. Following the general procedure A (0.1 mmol scale), the title compound was obtained in 51% yield (34.6 mg) as brown oil. <sup>1</sup>H NMR (400 MHz, CDCl<sub>3</sub>) δ 7.88 (d, *J* = 8.8 Hz, 2H), 7.45 (d, *J* = 8.7 Hz, 2H), 7.24-7.22 (m, 2H), 7.12-7.02 (m, 6H), 6.96-6.92 (m, 2H), 6.84 (dd, *J* = 8.1, 2.0 Hz, 1H), 6.77 (s, 1H), 5.10 (br, 2H), 3.75 (t, *J* = 6.6 Hz, 2H), 3.45 (s, 2H), 3.04 (s, 4H), 2.43 (t, *J* = 6.4 Hz, 2H), 2.14 (s, 3H), 1.75

(p,  $J = 6.5$  Hz, 2H).  $^{19}\text{F}$  NMR (376 MHz,  $\text{CDCl}_3$ )  $\delta$  -62.39.  $^{13}\text{C}$  NMR (101 MHz,  $\text{CDCl}_3$ )  $\delta$  148.99, 147.77, 145.07, 144.13 (q,  $J = 38.6$  Hz), 142.44, 141.58, 135.10, 131.49, 131.25, 129.54, 129.46, 128.82, 128.74, 127.50, 127.43, 127.26, 126.60, 125.53, 123.30, 121.96, 121.06 (q,  $J = 269.2$  Hz), 120.53, 119.76, 106.47, 61.75, 54.94, 48.60, 42.18, 32.18, 31.48, 25.41.  $^{19}\text{F}$  NMR (376 MHz,  $\text{CDCl}_3$ )  $\delta$  -62.36. HRMS *calcd.* for  $\text{C}_{35}\text{H}_{33}\text{N}_5\text{O}_2\text{SClF}_3$   $[\text{M}+\text{H}]^+$ : 680.2074, *found* 680.2067.

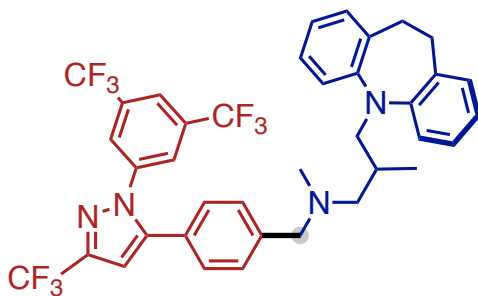

***N*-(4-(1-(3,5-bis(trifluoromethyl)phenyl)-3-(trifluoromethyl)-1*H*-pyrazol-5-yl)benzyl)-3-(10,11-dihydro-5*H*-dibenzo[*b,f*]azepin-5-yl)-*N*,2-dimethylpropan-1-amine (28)**. Following the general procedure A (0.1 mmol scale), the title compound was obtained in 47% yield (34.0 mg) as brown oil.  $^1\text{H}$  NMR (400 MHz,  $\text{CDCl}_3$ )  $\delta$  7.82 (s, 1H), 7.79 (s, 2H), 7.38 (d,  $J = 7.6$  Hz, 2H), 7.17 (d,  $J = 7.9$  Hz, 2H), 7.10-7.08 (m, 6H), 6.92-6.88 (m, 2H), 6.81 (s, 1H), 3.99-3.94 (m, 1H), 3.49-4.40 (m, 2H), 3.29-3.14 (m, 2H), 3.18 (s, 2H), 2.39-2.32 (m, 1H), 2.18-2.01 (m, 5H), 0.93 (d,  $J = 5.9$  Hz, 3H).  $^{13}\text{C}$  NMR (101 MHz,  $\text{CDCl}_3$ )  $\delta$  148.60, 145.34, 144.60 (d,  $J = 38.8$  Hz), 142.08, 140.32, 134.14, 132.61 (d,  $J = 34.3$  Hz), 129.88, 129.55, 128.79, 126.26, 124.95, 124.92, 122.55 (d,  $J = 273.1$  Hz), 122.34, 121.50, 120.94 (d,  $J = 269.3$  Hz), 119.87, 106.80, 106.79, 63.14, 62.40, 56.00, 42.74, 32.30, 29.44, 17.51.  $^{19}\text{F}$  NMR (376 MHz,  $\text{CDCl}_3$ )  $\delta$  -62.56, -63.13. HRMS *calcd.* for  $\text{C}_{38}\text{H}_{33}\text{N}_4\text{F}_9$   $[\text{M}+\text{H}]^+$ : 717.2640, *found* 717.2653.

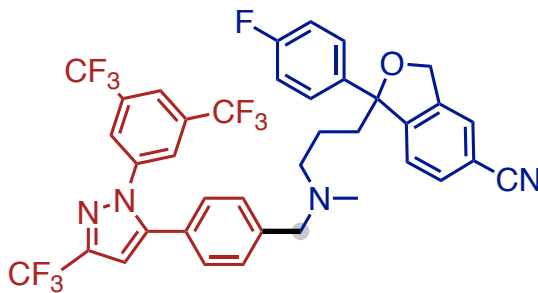

**1-(3-((4-(1-(3,5-bis(trifluoromethyl)phenyl)-3-(trifluoromethyl)-1*H*-pyrazol-5-yl)benzyl)(methyl)amino)propyl)-1-(4-fluorophenyl)-1,3-dihydroisobenzofuran-5-**

**carbonitrile (29).** Following the general procedure A (0.1 mmol scale), the title compound was obtained in 45% yield (31.9 mg) as colorless oil.  $^1\text{H}$  NMR (400 MHz,  $\text{CDCl}_3$ )  $\delta$  7.82 (s, 1H), 7.77 (s, 2H), 7.59 (d,  $J = 7.9$  Hz, 1H), 7.51 (s, 1H), 7.44-7.37 (m, 3H), 7.32 (d,  $J = 8.0$  Hz, 2H), 7.16 (d,  $J = 8.1$  Hz, 2H), 7.00 (t,  $J = 8.7$  Hz, 2H), 2.36 (t,  $J = 6.8$  Hz, 2H), 7.69 (s, 1H), 5.21-5.13 (m, 2H), 3.45 (s, 2H), 2.27-2.10 (m, 2H), 2.08 (s, 3H), 1.58-1.48 (m, 1H), 1.44-1.35 (m, 1H).  $^{13}\text{C}$  NMR (101 MHz,  $\text{CDCl}_3$ )  $\delta$  163.41, 160.96, 149.59, 145.33, 144.71 (q,  $J = 38.8$  Hz), 140.50, 140.38, 139.66, 132.68 (q,  $J = 34.2$  Hz), 131.99, 129.82, 128.97, 126.90, 126.82, 125.38, 125.03, 125.00, 122.83, 122.65 (d,  $J = 273.1$  Hz), 121.58, 121.01 (d,  $J = 269.2$  Hz), 118.73, 115.59, 115.37, 111.92, 106.91, 91.23, 71.39, 61.87, 57.27, 41.77, 38.98, 21.98, 14.32.  $^{19}\text{F}$  NMR (376 MHz,  $\text{CDCl}_3$ )  $\delta$  -62.56, -63.14, -115.31. HRMS *calcd.* for  $\text{C}_{38}\text{H}_{28}\text{N}_4\text{OF}_{10}$   $[\text{M}+\text{H}]^+$ : 747.2181, *found* 747.2181.

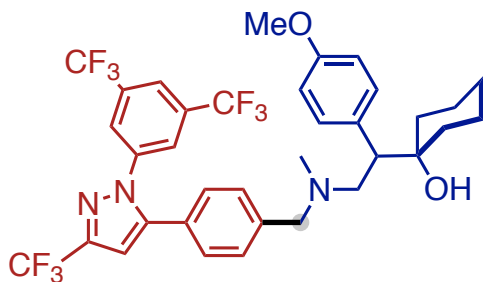

**1-(2-((4-(1-(3,5-bis(trifluoromethyl)phenyl)-3-(trifluoromethyl)-1H-pyrazol-5-yl)benzyl)(methyl)amino)-1-(4-methoxyphenyl)ethyl)cyclohexan-1-ol (30).** Following the general procedure A (0.1 mmol scale), the title compound was obtained in 83% yield (58.0 mg) as colorless oil.  $^1\text{H}$  NMR (400 MHz,  $\text{CDCl}_3$ )  $\delta$  7.84 (s, 1H), 7.78 (s, 2H), 7.37 (d,  $J = 7.9$  Hz, 2H), 7.21 (d,  $J = 8.1$  Hz, 2H), 7.03 (d,  $J = 8.6$  Hz, 2H), 6.81 (d,  $J = 10.1$  Hz, 3H), 3.79-3.78 (m, 4H), 3.47-3.37 (m, 2H), 3.07-3.04 (m, 1H), 2.47-2.43 (m, 1H), 2.26 (s, 3H), 1.71-0.83 (m, 11H).  $^{13}\text{C}$  NMR (101 MHz,  $\text{CDCl}_3$ )  $\delta$  74.40, 62.31, 59.37, 55.18, 51.55, 41.93, 37.95, 31.25, 25.84, 21.48, 21.34.  $^{13}\text{C}$  NMR (101 MHz,  $\text{CDCl}_3$ )  $\delta$  158.40, 145.04, 144.61 (q,  $J = 38.8$  Hz), 140.24, 140.05, 132.67 (q,  $J = 34.3$  Hz), 132.53, 130.10, 129.01, 127.40, 125.06, 125.03, 122.51 (q,  $J = 273.2$  Hz), 121.65 (m), 120.87 (q,  $J = 269.3$  Hz), 113.39, 106.85, 74.40, 62.31, 59.37, 55.18, 51.55, 41.93, 37.95, 31.25, 25.84, 21.48, 21.34.  $^{19}\text{F}$  NMR (376 MHz,  $\text{CDCl}_3$ )  $\delta$  -62.56, -63.16. HRMS *calcd.* for  $\text{C}_{35}\text{H}_{34}\text{N}_3\text{O}_2\text{F}_9$   $[\text{M}+\text{H}]^+$ : 700.2585, *found* 700.2574.

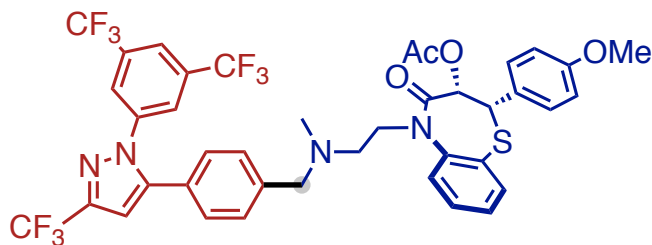

(contains 19% oxidized diltiazem impurity, likely the formamide)

**(2S,3S)-5-(2-((4-(1-(3,5-bis(trifluoromethyl)phenyl)-3-(trifluoromethyl)-1H-pyrazol-5-yl)benzyl)(methyl)amino)ethyl)-2-(4-methoxyphenyl)-4-oxo-2,3,4,5-tetrahydrobenzo[b][1,4]thiazepin-3-yl acetate (31).** Following the general procedure A (0.1 mmol scale), the title compound was obtained in 77% yield (64.0 mg) as colorless oil. <sup>1</sup>H NMR (400 MHz, CDCl<sub>3</sub>) δ 7.83 (s, 1H), 7.78 (s, 2H), 7.71 (d, *J* = 7.4 Hz, 1H), 7.48-7.47 (m, 2H), 7.44-7.41 (m, 2H), 7.28-7.24 (3H), 7.12 (d, *J* = 8.1 Hz, 2H), 6.87 (d, *J* = 8.7 Hz, 2H), 6.80 (s, 1H), 5.18 (d, *J* = 7.6 Hz, 1H), 5.03 (d, *J* = 7.6 Hz, 1H), 4.51 (dt, *J* = 13.7, 6.8 Hz, 1H), 3.83-3.79 (m, 1H), 3.81 (s, 3H), 3.63-3.54 (m, 2H), 2.92-2.85 (m, 1H), 2.75-2.68 (m, 1H), 2.17 (s, 3H), 1.91 (s, 3H). <sup>13</sup>C NMR (101 MHz, CDCl<sub>3</sub>) δ 170.02, 167.09, 159.86, 145.82, 145.41, 144.64 (q, *J* = 38.8 Hz), 140.86, 140.37, 135.53, 132.68 (q, *J* = 34.2 Hz), 131.10, 130.91, 129.82, 128.85, 127.40, 126.78, 125.04, 125.00, 124.70, 123.23, 122.62 (q, *J* = 273.1 Hz), 121.58, 121.02 (q, *J* = 269.3 Hz), 113.84, 106.86, 71.21, 61.79, 55.63, 55.28, 54.57, 47.88, 41.82, 20.59. <sup>19</sup>F NMR (376 MHz, CDCl<sub>3</sub>) δ -62.55, -63.16. HRMS *calcd.* for C<sub>40</sub>H<sub>33</sub>N<sub>4</sub>O<sub>4</sub>SF<sub>9</sub> [M+H]<sup>+</sup>: 837.2157, *found* 837.2169.

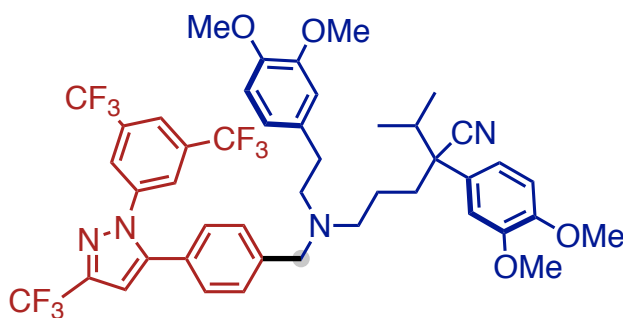

**5-((4-(1-(3,5-bis(trifluoromethyl)phenyl)-3-(trifluoromethyl)-1H-pyrazol-5-yl)benzyl)(3,4-dimethoxyphenethyl)amino)-2-(3,4-dimethoxyphenyl)-2-isopropylpentanenitrile (32).** Following the general procedure A (0.1 mmol scale), the title compound was obtained in 64% yield (56.1 mg) as colorless oil. <sup>1</sup>H NMR (400 MHz, CDCl<sub>3</sub>) δ 7.83 (s, 1H), 7.78 (s, 2H), 7.28-7.26 (m, 2H), 7.14 (d, *J* = 7.7 Hz, 2H), 6.87-6.80

(m, 4H), 6.76 (d,  $J = 8.3$  Hz, 1H), 6.63-6.61 (m, 2H), 3.89 (d,  $J = 2.9$  Hz, 1H), 3.85 (s, 3H), 3.84 (s, 6H), 3.81 (s, 3H), 3.57 (br, 1H), 2.64-1.50 (m, 11H), 1.15 (d,  $J = 6.6$  Hz, 3H), 0.78 (d,  $J = 6.7$  Hz, 3H).  $^{13}\text{C}$  NMR (101 MHz,  $\text{CDCl}_3$ )  $\delta$  149.20, 148.99, 148.52, 147.54, 145.39, 144.63 (q,  $J = 39.3$  Hz), 142.31, 140.44, 133.09, 132.58 (q,  $J = 34.6, 34.0$  Hz), 130.80, 129.52, 128.86, 126.88, 125.05, 122.54 (q,  $J = 273.0$  Hz), 121.54, 120.88 (q,  $J = 269.2$  Hz), 120.74, 118.75, 112.34, 111.45, 111.30, 110.00, 106.95, 58.07, 56.13, 56.07, 55.98, 55.54, 53.45, 53.05, 38.10, 35.62, 33.17, 23.20, 19.02, 18.65.  $^{19}\text{F}$  NMR (376 MHz,  $\text{CDCl}_3$ )  $\delta$  -62.57, -63.08. HRMS *calcd.* for  $\text{C}_{45}\text{H}_{45}\text{N}_4\text{O}_4\text{F}_9$   $[\text{M}+\text{H}]^+$ : 877.3375, *found* 877.3352.

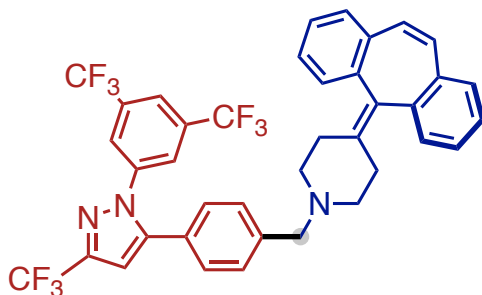

**1-(4-(1-(3,5-bis(trifluoromethyl)phenyl)-3-(trifluoromethyl)-1H-pyrazol-5-yl)benzyl)-4-(5H-dibenzo[*a,d*][7]annulen-5-ylidene)piperidine (33).** Following the general procedure A (0.1 mmol scale), the title compound was obtained in 45% yield (31.9 mg) as red oil.  $^1\text{H}$  NMR (400 MHz,  $\text{CDCl}_3$ )  $\delta$  7.74 (s, 1H), 7.68 (s, 2H), 7.30-7.22 (m, 6H), 7.18-7.07 (m, 6H), 6.85 (s, 2H), 6.71 (s, 1H), 3.43 (s, 2H), 2.54-2.39 (m, 2H), 2.36-2.23 (m, 2H), 2.12-2.03 (m, 4H).  $^{13}\text{C}$  NMR (101 MHz,  $\text{CDCl}_3$ )  $\delta$  145.36, 144.72 (q,  $J = 38.9$  Hz), 140.38, 139.21, 134.92, 132.73 (q,  $J = 34.3$  Hz), 131.14, 130.03, 128.95, 128.62, 128.35, 127.91, 126.44, 125.07, 125.04, 122.64 (q,  $J = 273.1$  Hz), 121.63, 121.04 (d,  $J = 269.3$  Hz), 106.90, 62.36, 55.16, 30.05.  $^{19}\text{F}$  NMR (376 MHz,  $\text{CDCl}_3$ )  $\delta$  -62.56, -63.20. HRMS *calcd.* for  $\text{C}_{39}\text{H}_{28}\text{N}_3\text{F}_9$   $[\text{M}+\text{H}]^+$ : 710.2218, *found* 710.2220.

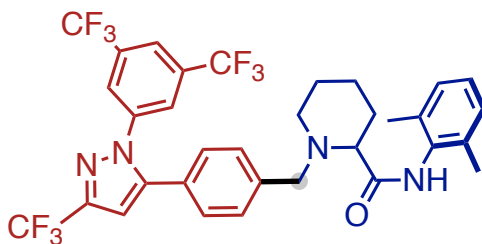

**1-(4-(1-(3,5-bis(trifluoromethyl)phenyl)-3-(trifluoromethyl)-1H-pyrazol-5-yl)benzyl)-*N*-(2,6-dimethylphenyl)piperidine-2-carboxamide (34).** Following the

general procedure A (0.1 mmol scale), the title compound was obtained in 37% yield (24.7 mg) as white solid.  $^1\text{H}$  NMR (400 MHz,  $\text{CDCl}_3$ )  $\delta$  8.08 (s, 1H), 7.82 (s, 1H), 7.77 (s, 2H), 7.42 (d,  $J = 8.1$  Hz, 2H), 7.21 (d,  $J = 8.2$  Hz, 2H), 7.12-7.05 (m, 3H), 6.80 (s, 1H), 4.24 (d,  $J = 14.2$  Hz, 1H), 3.42 (d,  $J = 14.2$  Hz, 1H), 3.06 (dd,  $J = 10.2, 3.4$  Hz, 1H), 2.93 (dt,  $J = 11.7, 3.3$  Hz, 1H), 2.23-2.18 (m, 1H), 2.18 (s, 6H), 2.08-2.01 (m, 1H), 1.88-1.78 (m, 2H), 1.71-1.67 (m, 1H), 1.54-1.37 (m, 2H).  $^{13}\text{C}$  NMR (101 MHz,  $\text{CDCl}_3$ )  $\delta$  172.59, 145.11, 144.79 (q,  $J = 38.8$  Hz), 140.34, 135.60, 133.56, 132.78 (q,  $J = 34.2$  Hz), 129.30, 128.59, 127.53, 127.42, 125.05, 125.02, 122.64 (q,  $J = 273.0$  Hz), 121.72, 121.00 (q,  $J = 269.4$  Hz), 106.98, 68.57, 60.86, 51.96, 31.04, 24.94, 23.61, 18.84.  $^{19}\text{F}$  NMR (376 MHz,  $\text{CDCl}_3$ )  $\delta$  -62.57, -63.20. HRMS *calcd.* for  $\text{C}_{33}\text{H}_{29}\text{N}_4\text{O}_9$   $[\text{M}+\text{H}]^+$ : 669.2276, *found* 669.2272.

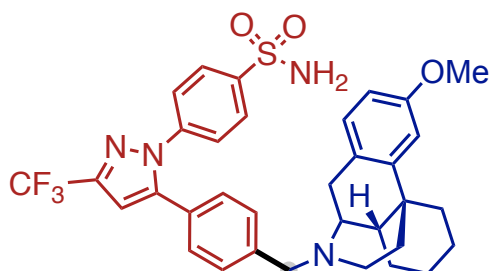

**4-(5-(4-(((4b*S*,8a*S*)-3-methoxy-6,7,8,8a,9,10-hexahydro-5*H*-9,4b-(epiminoethano)phenanthren-11-yl)methyl)phenyl)-3-(trifluoromethyl)-1*H*-pyrazol-1-yl)benzenesulfonamide (35).** Following the general procedure A (0.1 mmol scale), the title compound was obtained in 72% yield (45.8 mg) as yellow oil.  $^1\text{H}$  NMR (400 MHz,  $\text{CDCl}_3$ )  $\delta$  7.90-7.87 (m, 2H), 7.48-7.44 (m, 2H), 7.39-7.37 (m, 2H), 7.16 (d,  $J = 8.2$  Hz, 2H), 7.05 (d,  $J = 8.4$  Hz, 1H), 6.81 (d,  $J = 2.6$  Hz, 1H), 6.76 (s, 1H), 6.71 (dd,  $J = 8.4, 2.6$  Hz, 1H), 5.10 (br, 2H), 3.78 (s, 3H), 3.77-3.60 (m, 2H), 3.03-3.63 (m, 3H), 2.42-2.11 (m, 3H), 1.89-1.50 (m, 4H), 1.37-1.24 (m, 5H), 1.16-1.07 (m, 1H).  $^{13}\text{C}$  NMR (101 MHz,  $\text{CDCl}_3$ )  $\delta$  158.39, 145.29, 144.24 (q,  $J = 38.6$  Hz), 142.63, 141.94, 141.61, 129.89, 129.39, 128.88, 128.66, 127.62, 127.18, 125.64, 121.17 (q,  $J = 269.2$  Hz), 111.28, 110.91, 106.60, 59.02, 56.75, 55.34, 45.52, 45.29, 42.08, 37.89, 36.74, 26.94, 26.68, 24.91, 22.37.  $^{19}\text{F}$  NMR (376 MHz,  $\text{CDCl}_3$ )  $\delta$  -62.41. HRMS *calcd.* for  $\text{C}_{34}\text{H}_{35}\text{N}_4\text{O}_3\text{SF}_3$   $[\text{M}+\text{H}]^+$ : 637.2460, *found* 637.2471.

#### IV. References

1. Loh, Y. Y.; Nagao, K.; Hoover, A. J.; Hesk, D.; Rivera, N. R.; Colletti, S. L.; Davies, I. W.; MacMillan, D. W. C. Photoredox-Catalyzed Deuteration and Tritiation of Pharmaceutical Compounds. *Science* **2017**, *358*, 1182–1187.
2. Shen, Y.; Funes-Ardoiz, I.; Schoenebeck, F.; Rovis, T. Site-selective  $\alpha$ -C–H Functionalization of Trialkylamines via Reversible Hydrogen Atom Transfer Catalysis. *ChemRxiv* **2021**, DOI: 10.26434/chemrxiv.14442290.v1.
3. Chang, Y.; Yesilcimen, A.; Cao, M.; Zhang, Y.; Zhang, B.; Chan, J. Z.; Wasa, M. Catalytic Deuterium Incorporation within Metabolically Stable  $\beta$ -Amino C–H Bonds of Drug Molecules. *J. Am. Chem. Soc.* **2019**, *141*, 14570–14575.

# V. <sup>1</sup>H, <sup>13</sup>C and <sup>19</sup>F NMR spectra

ys-878.454.fid

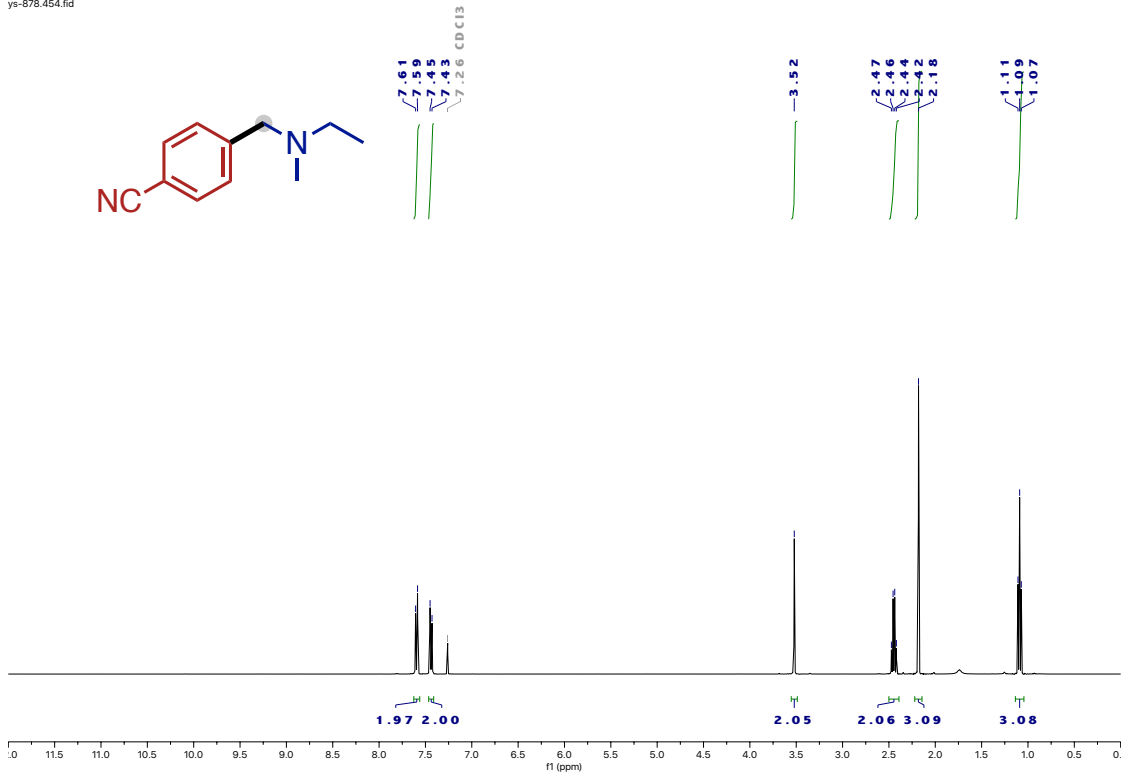

ys-878-c13.457.fid  
carbon 13

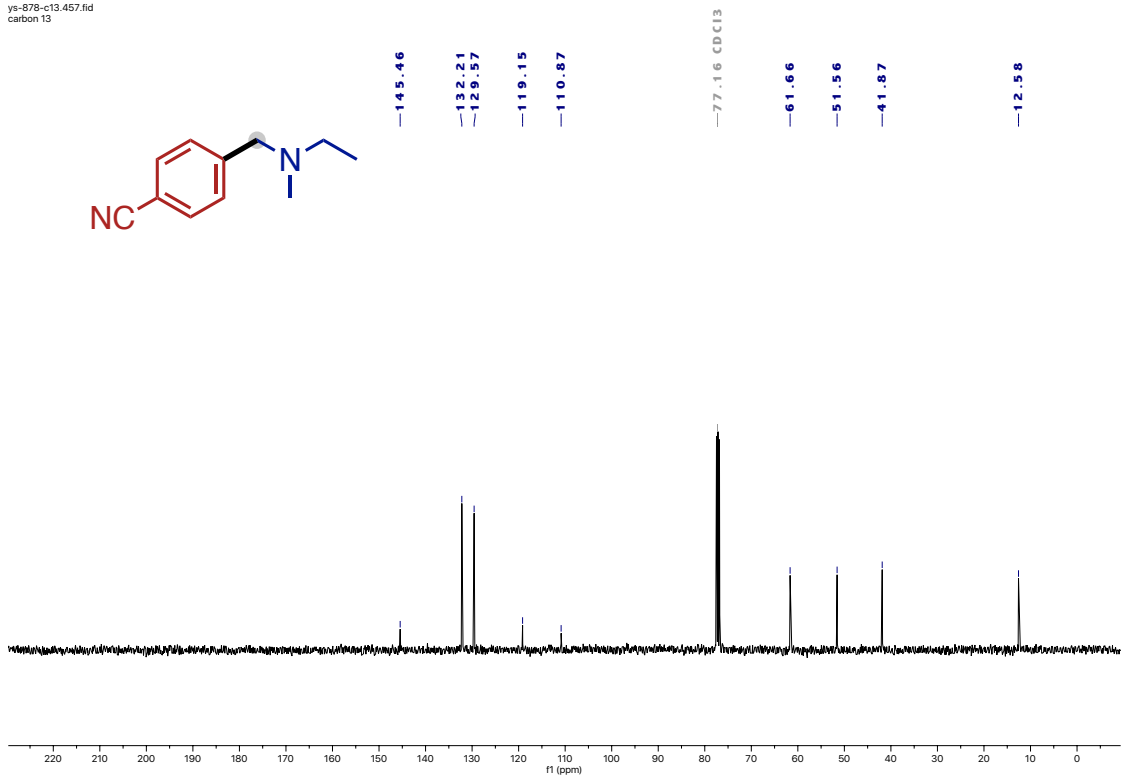



ys-763-6.326.fid  
proton

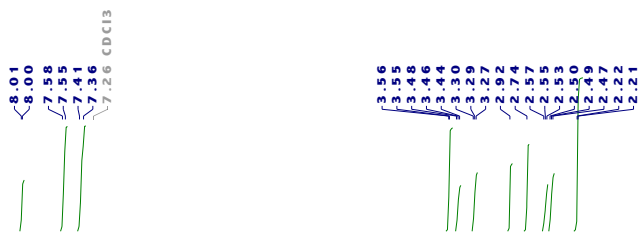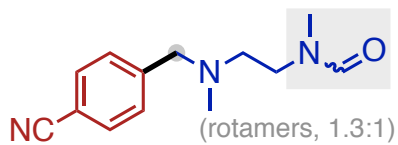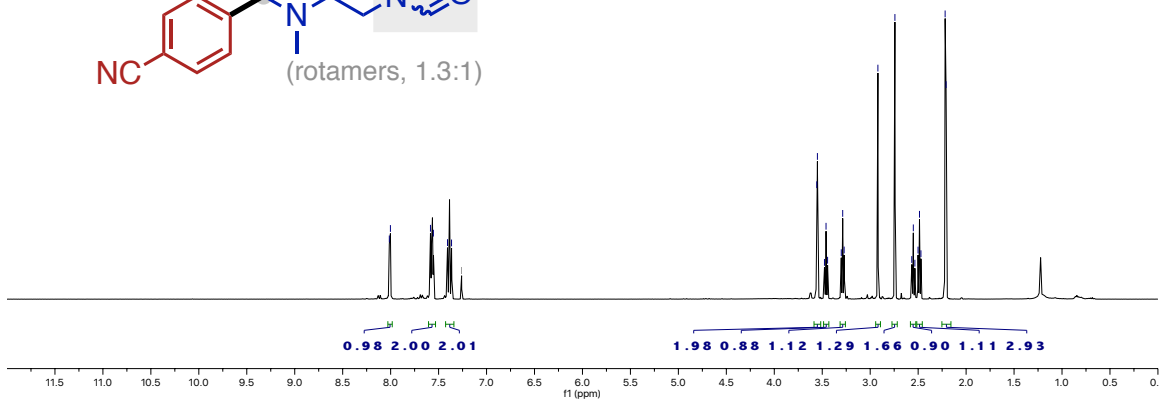

ys-763-6-c13.382.fid  
carbon 13

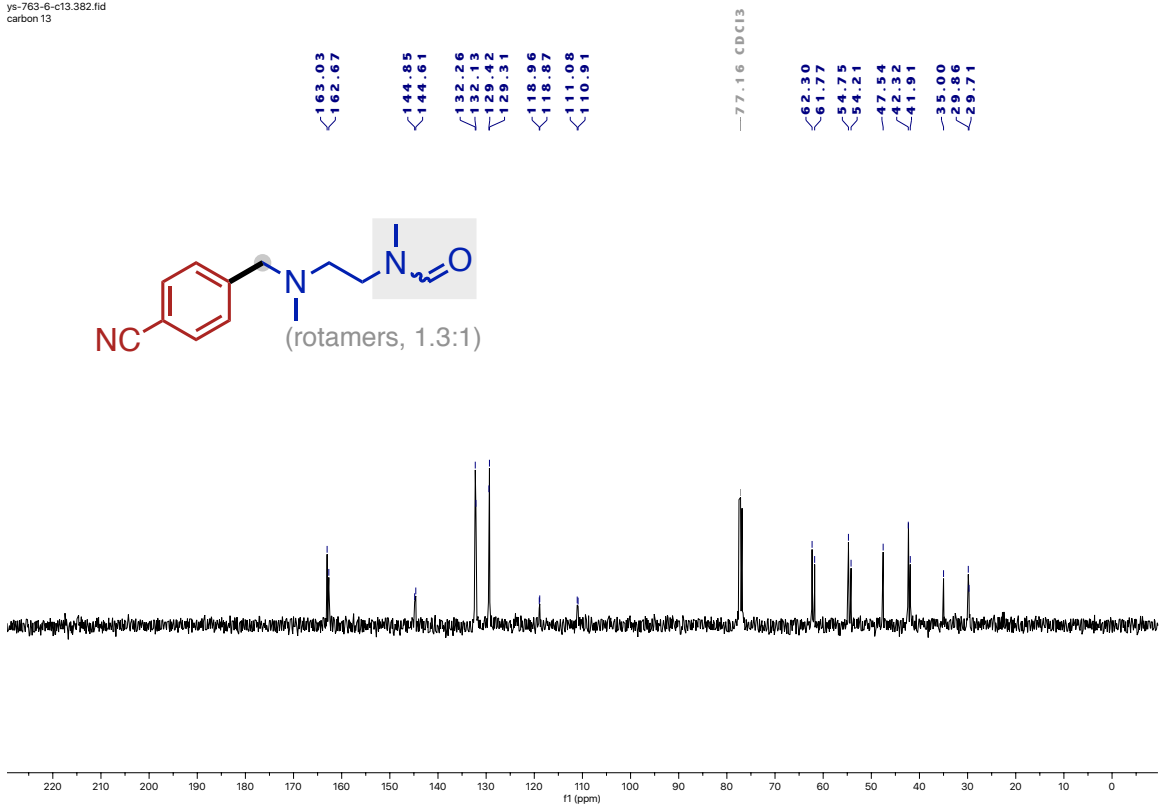

ys-677-3-1.345.fid

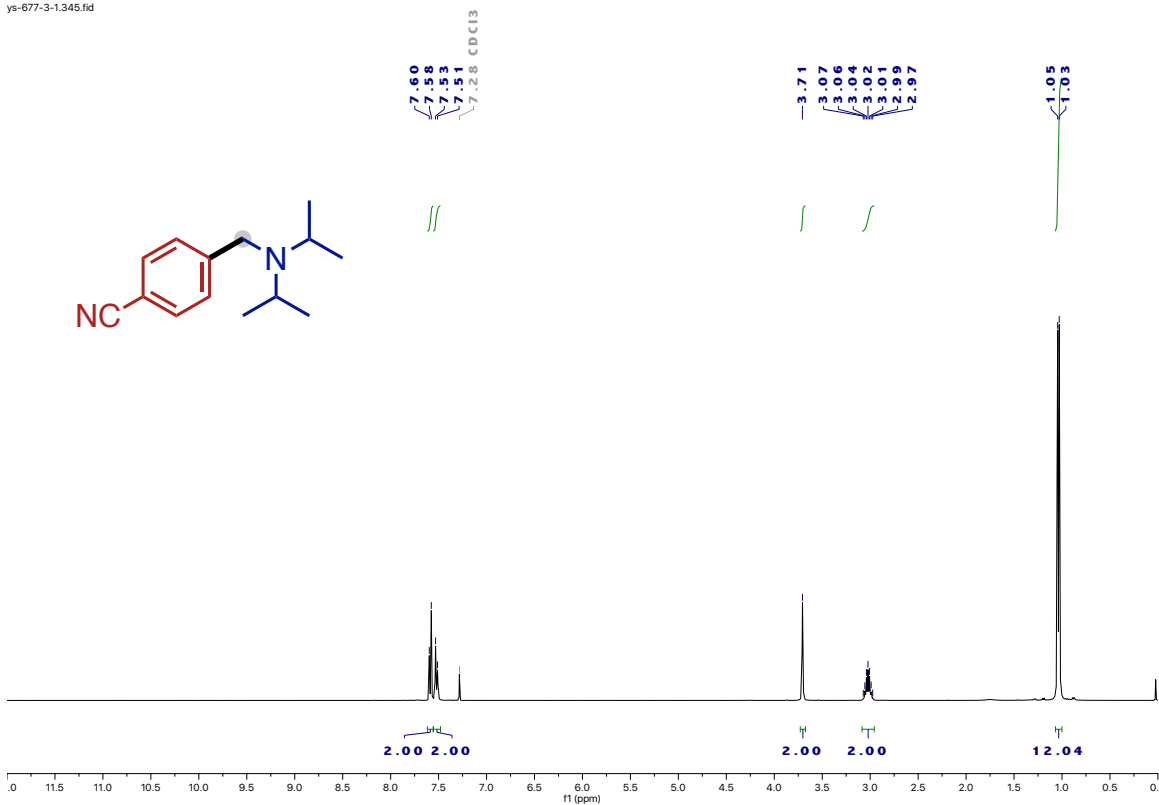

ys-677-3-1-c.346.fid  
carbon 13

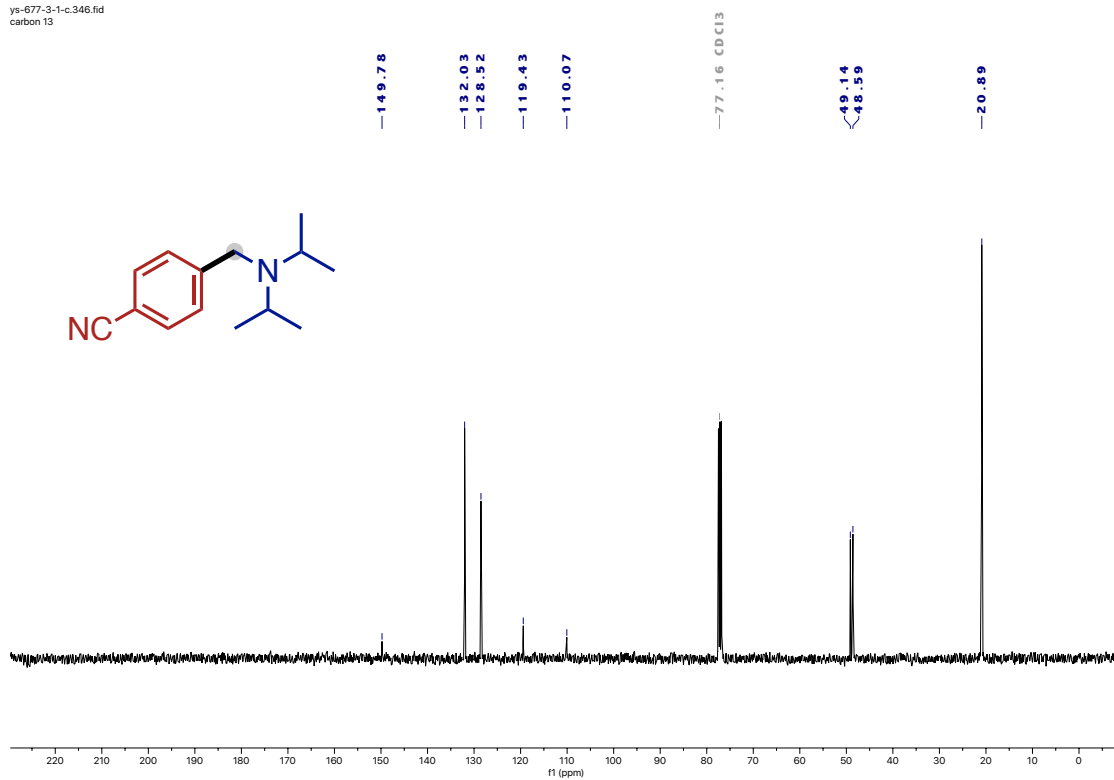

ys-763-7.310.fid  
proton

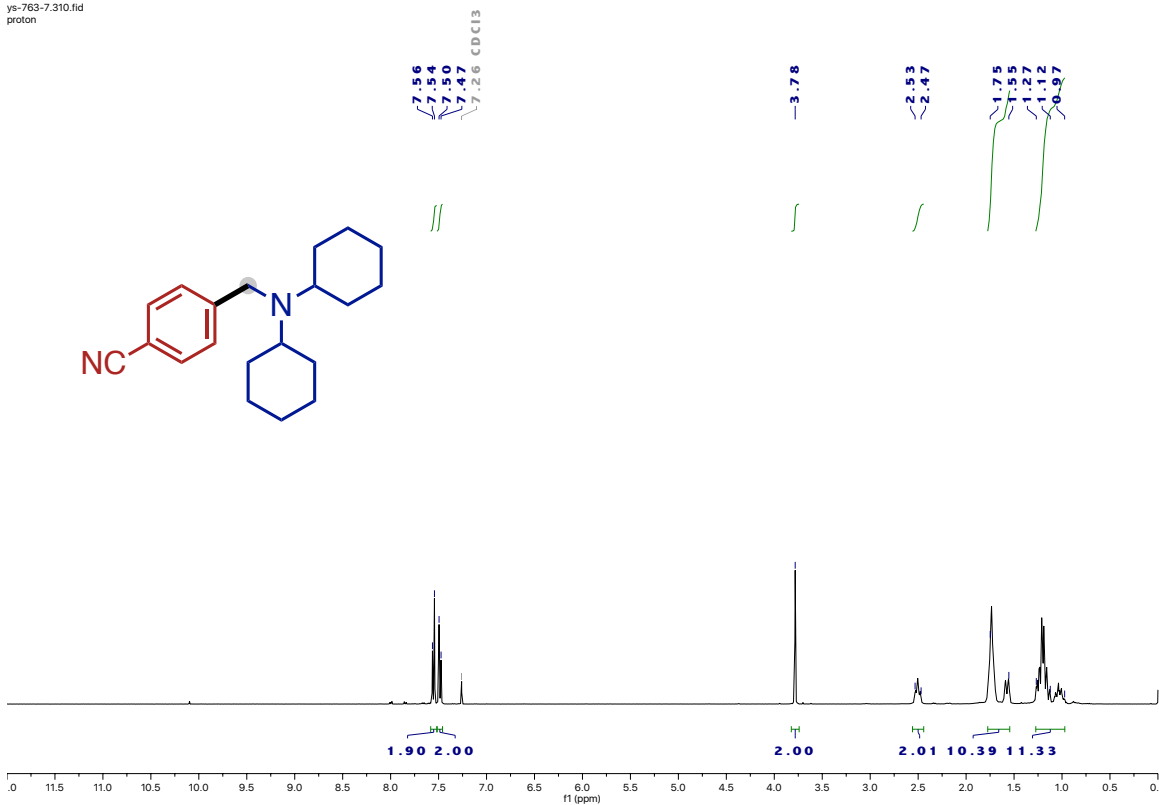

ys-763-7-c13.313.fid

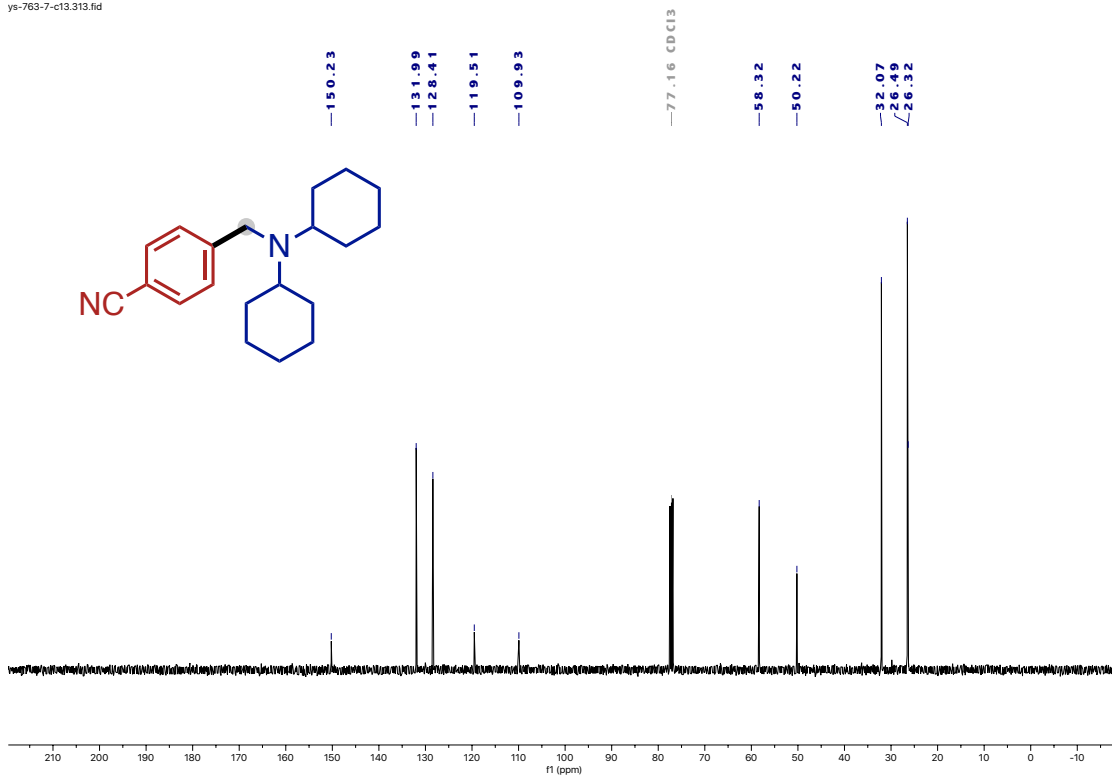

ys-763-3.308.fid  
proton

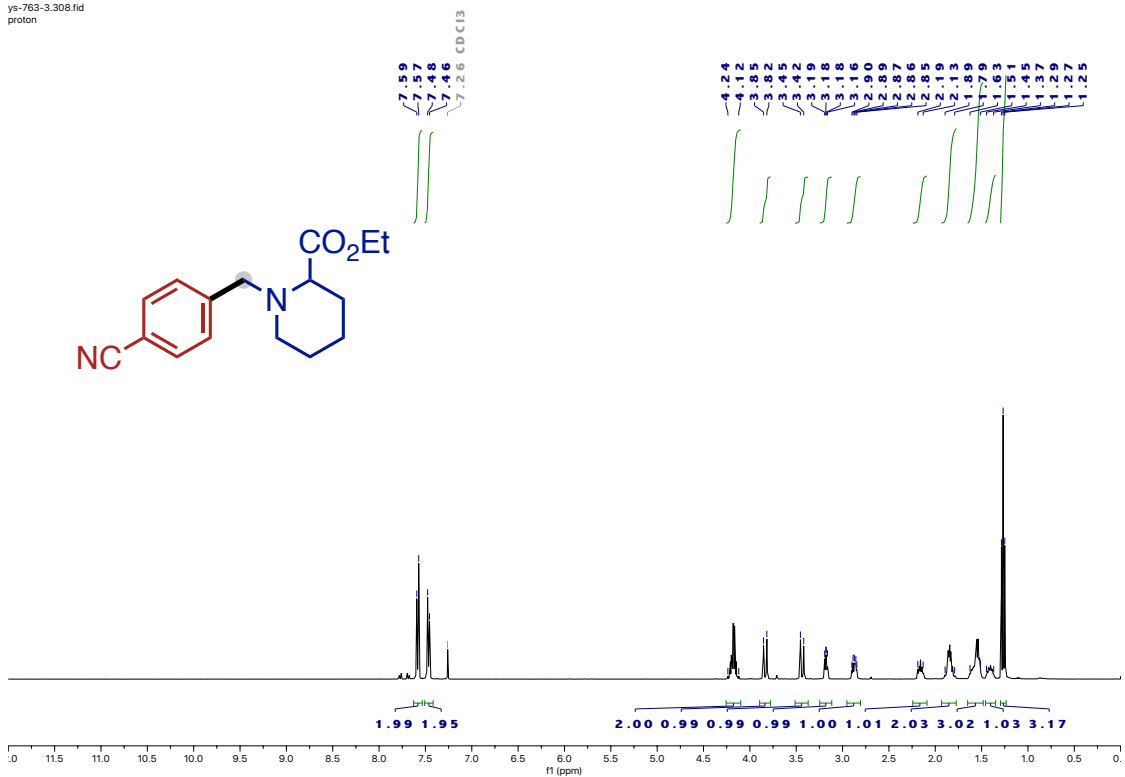

ys-763-3-c13.315.fid

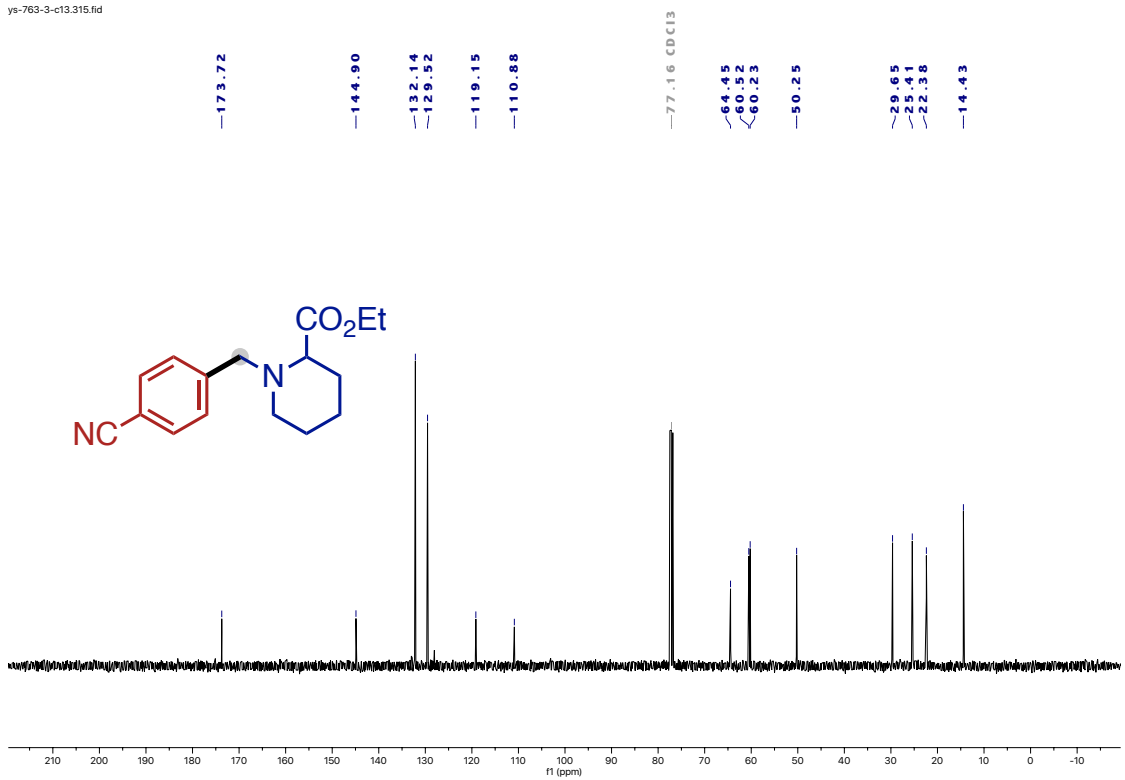

ys-763-4.309.fid  
proton

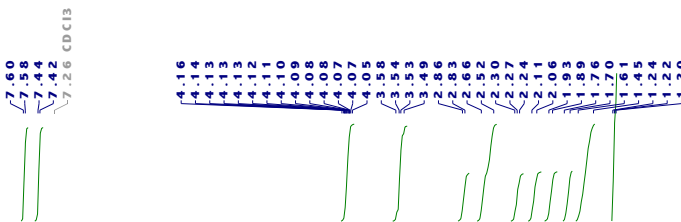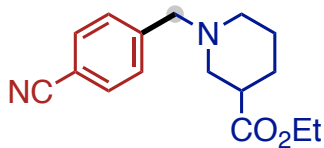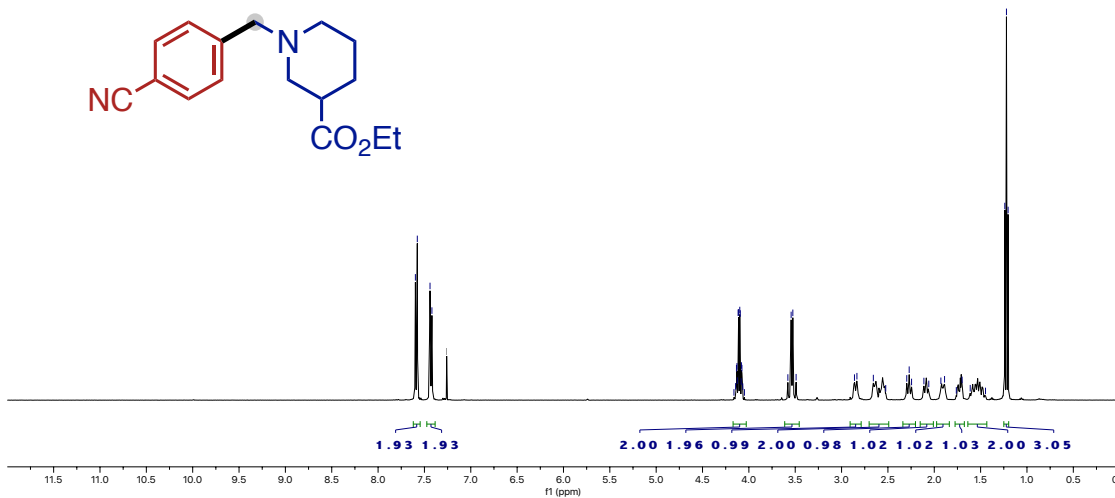

ys-763-4-c13.314.fid

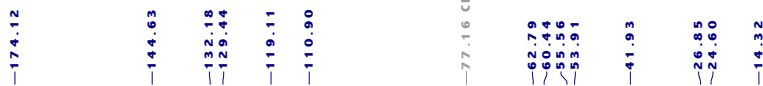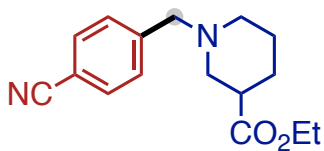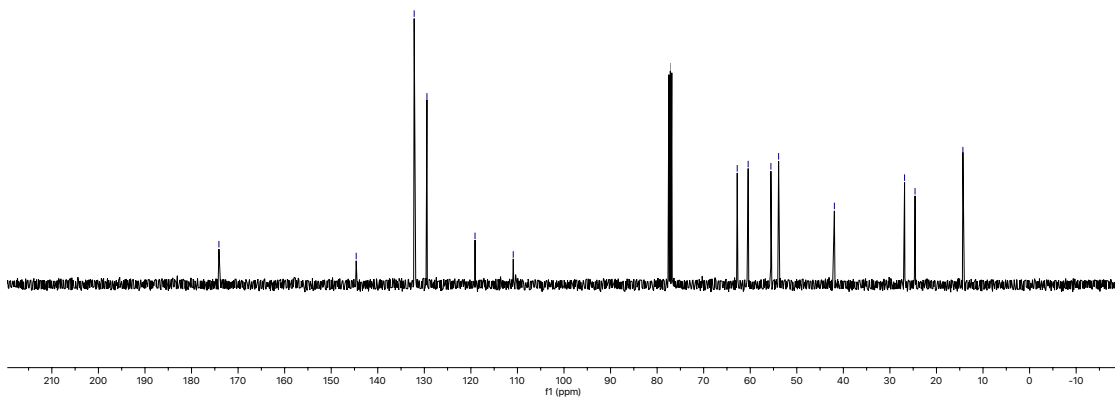

ys-681-5-2a.245.fid  
proton

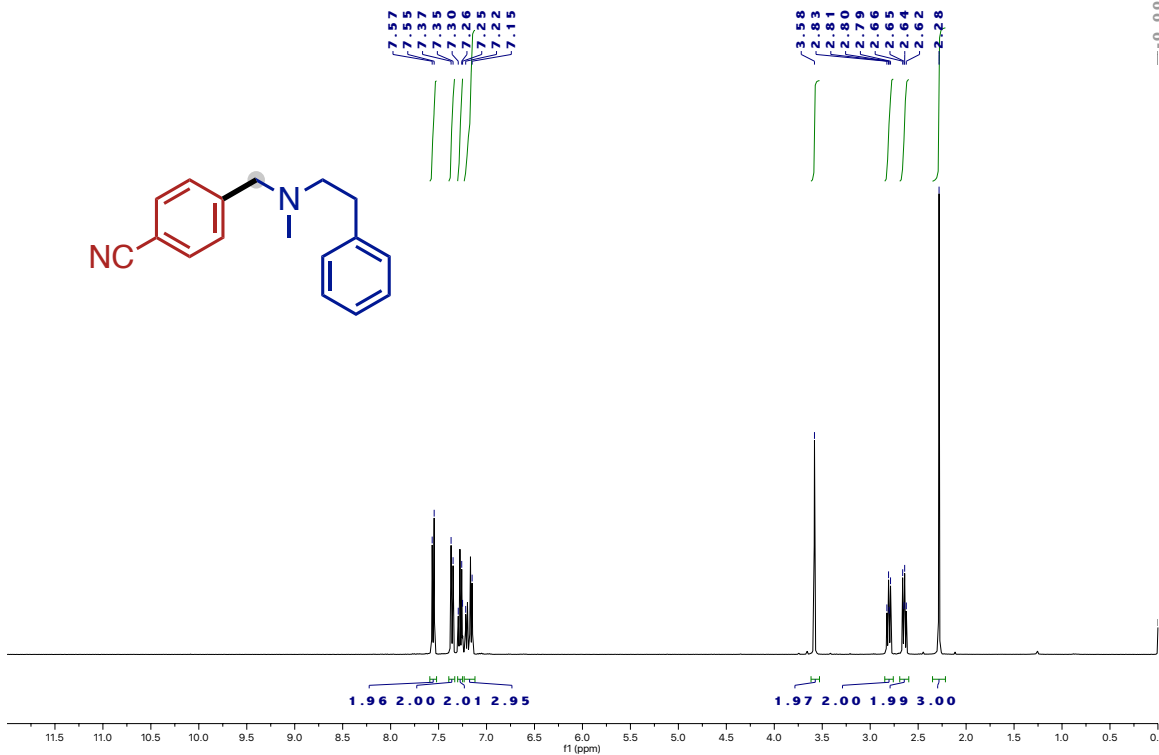

ys-681-5-2a-c.246.fid

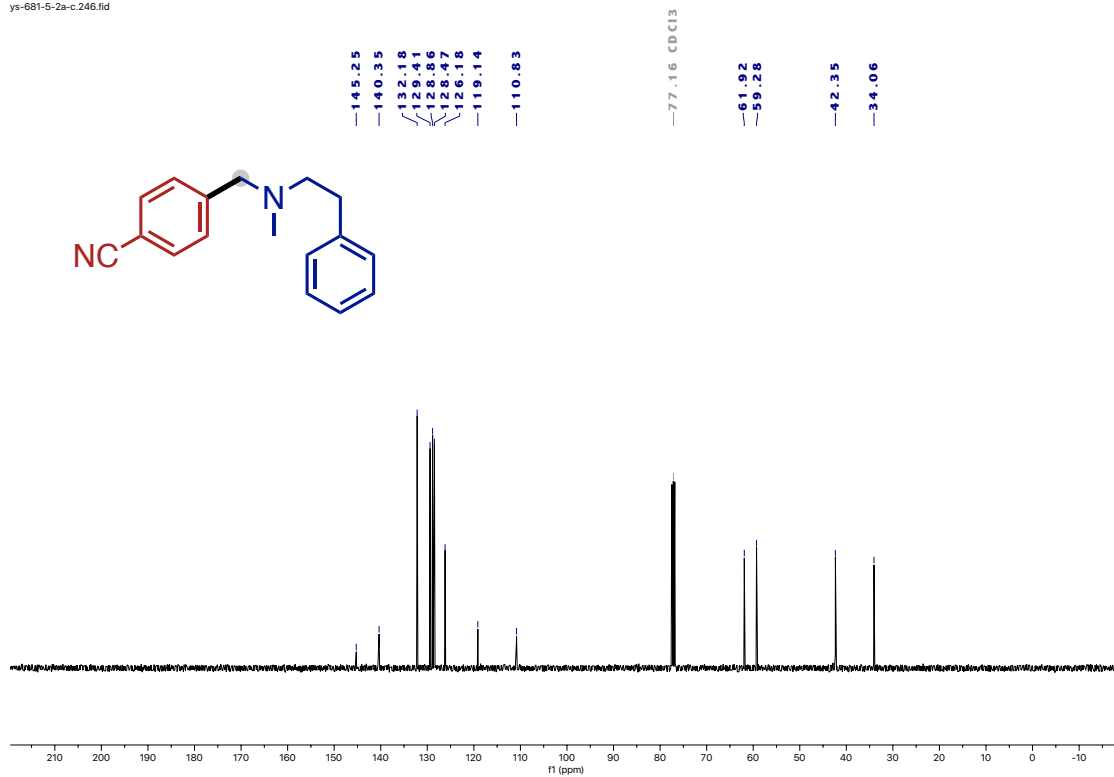

ys-877.455.fid

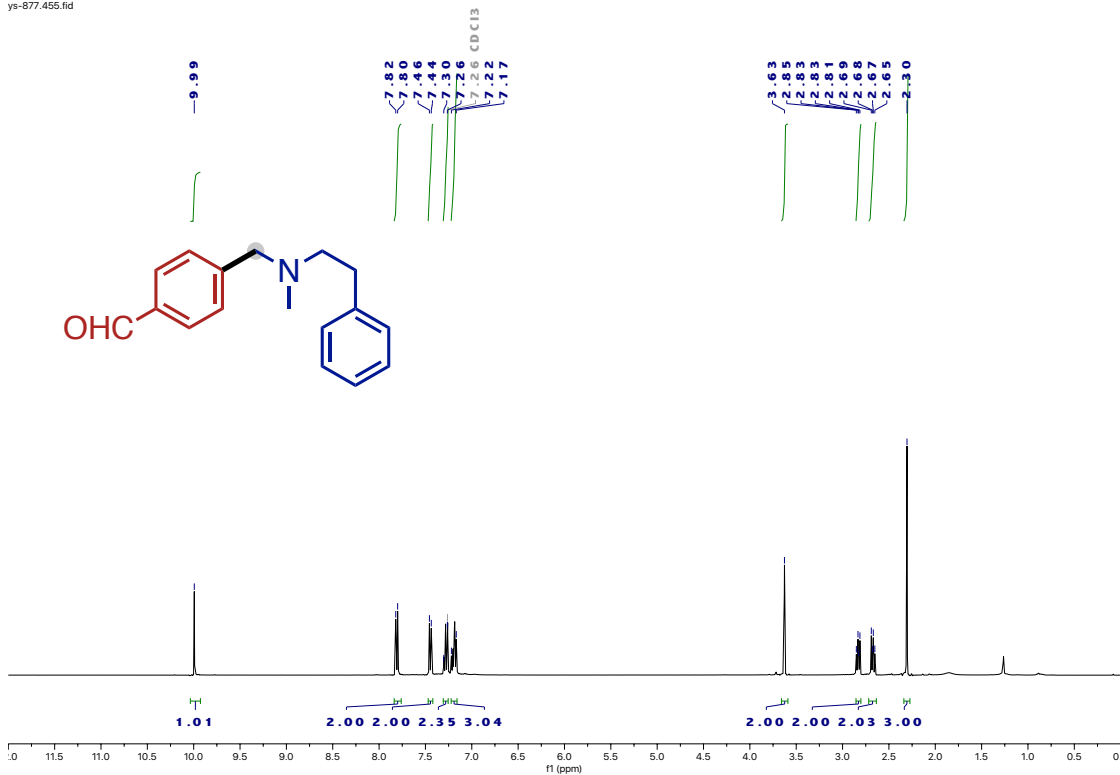

ys-877-c13.456.fid  
carbon 13

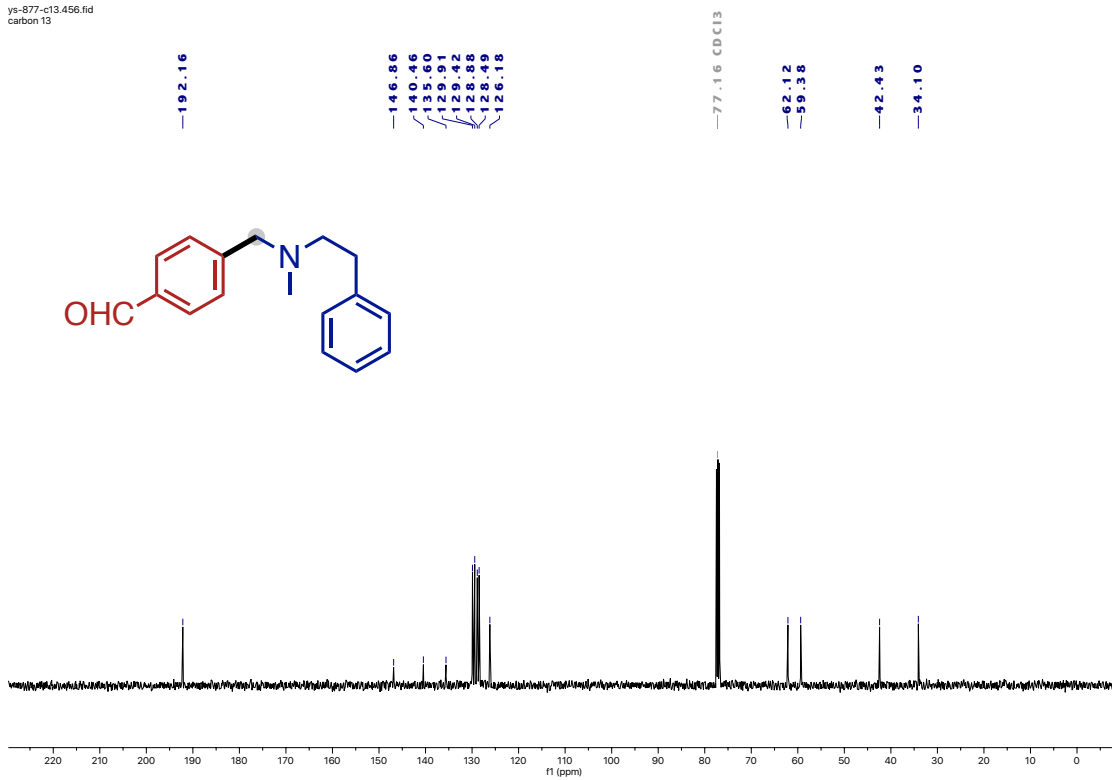

ys-707-1.263.fid  
proton

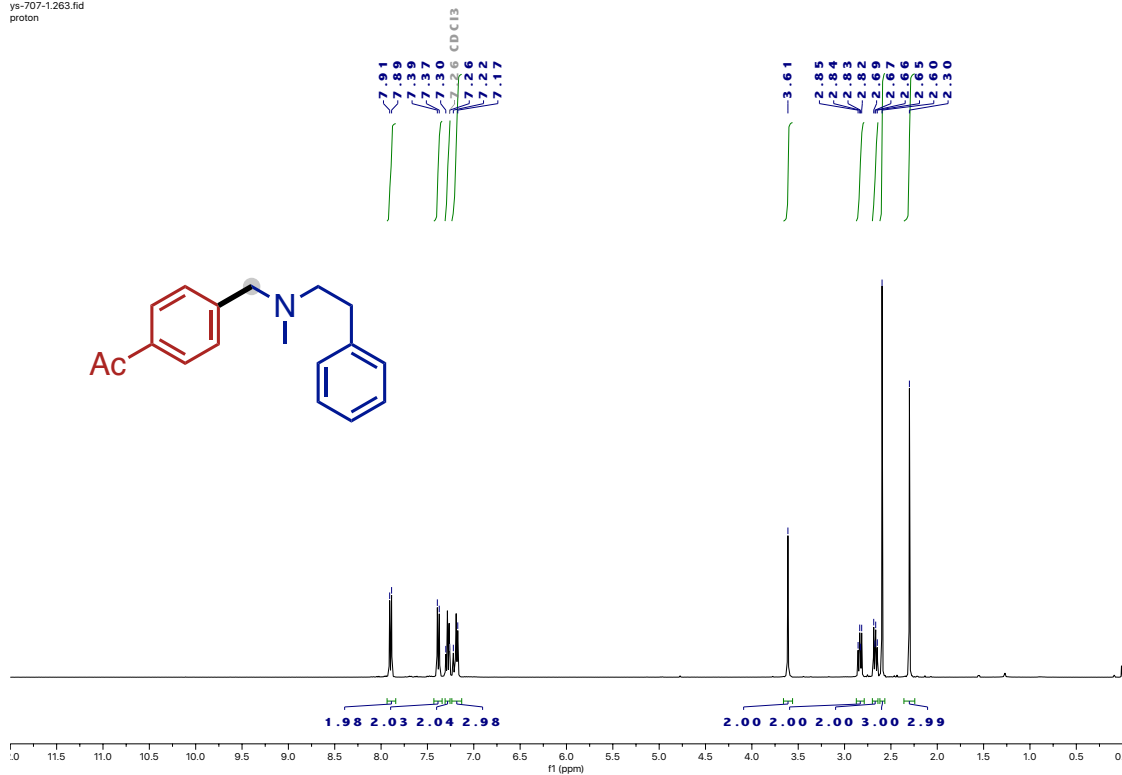

ys-707-1-c13.268.fid

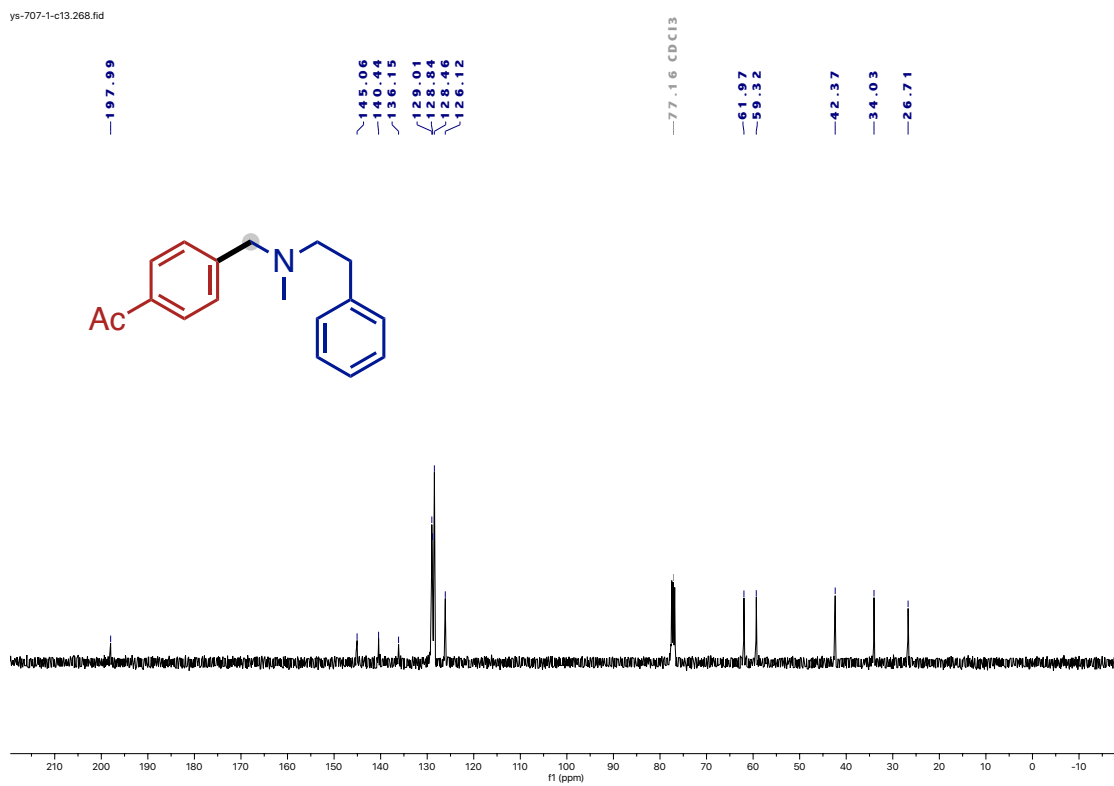



ys-728.293.fid  
proton

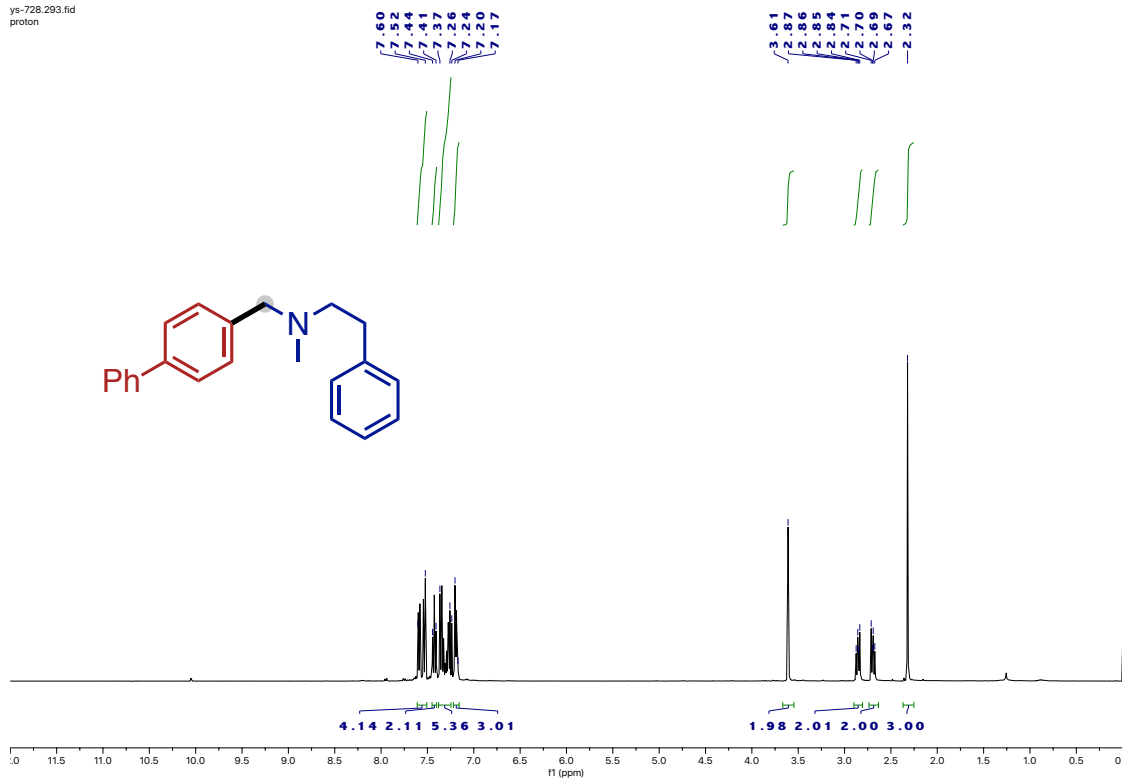

ys-728-c.296.fid

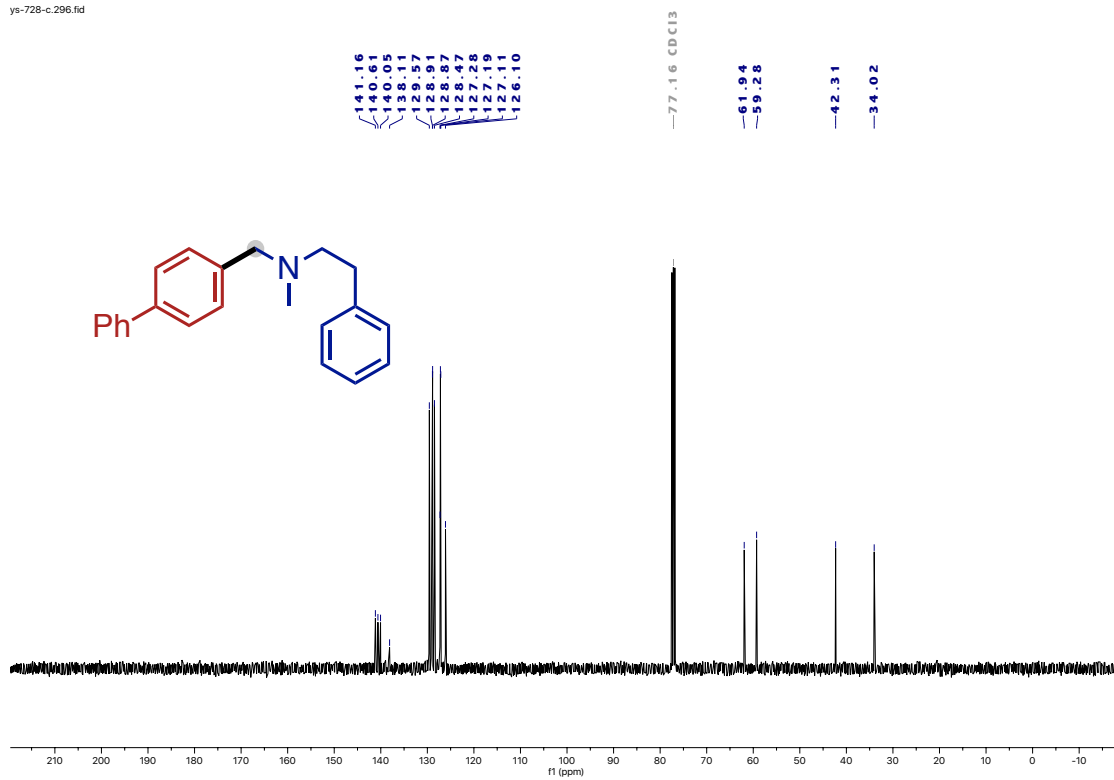

ys-723-a-282.fid  
proton

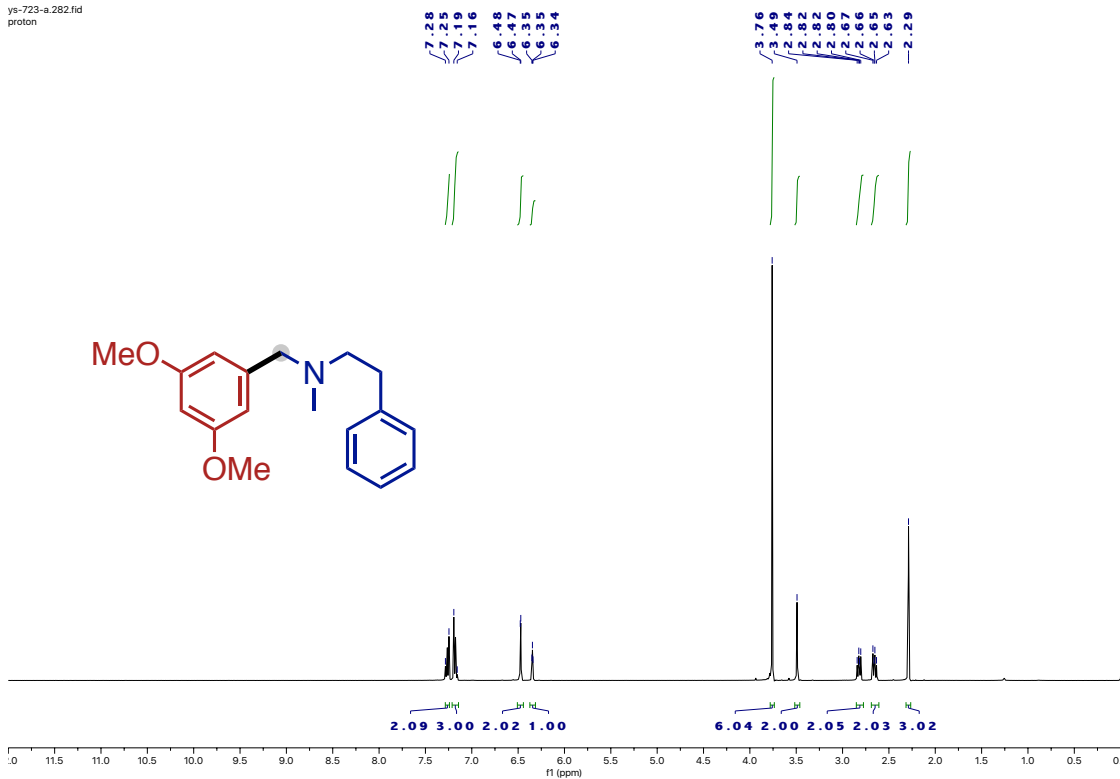

ys-723-a-c13.283.fid

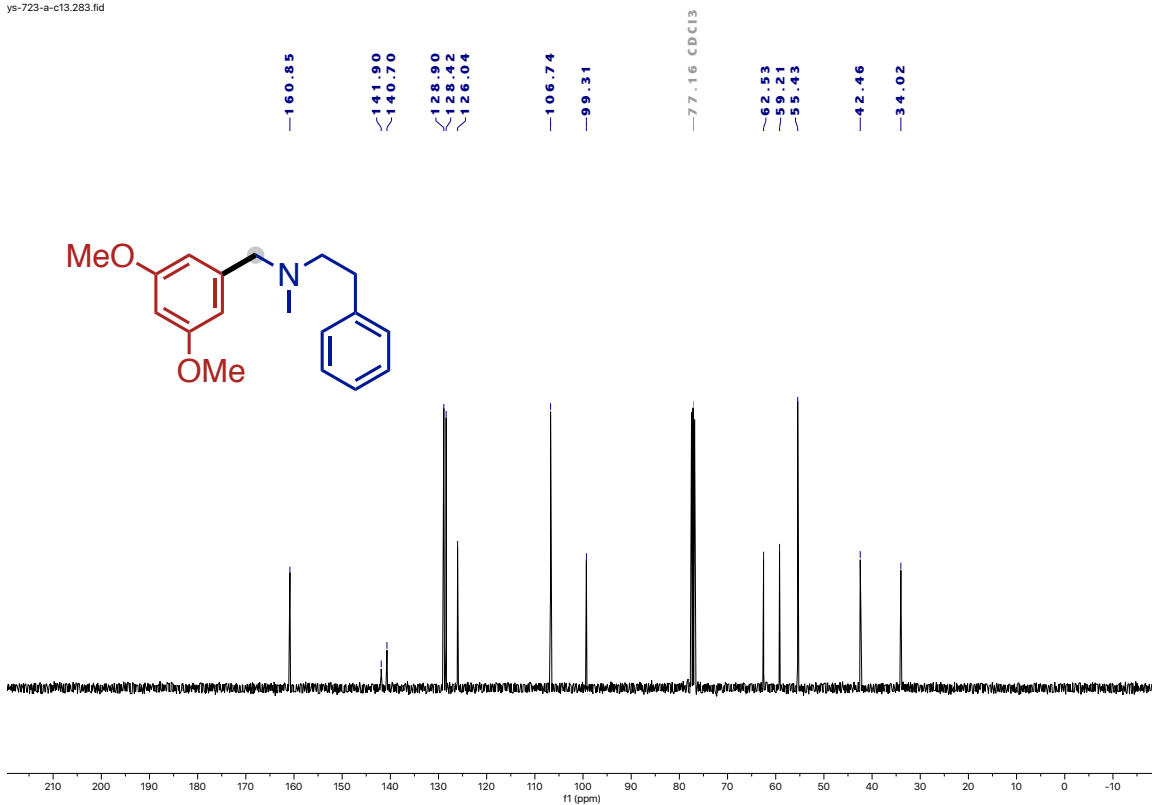

ys-707-9.265.fid  
proton

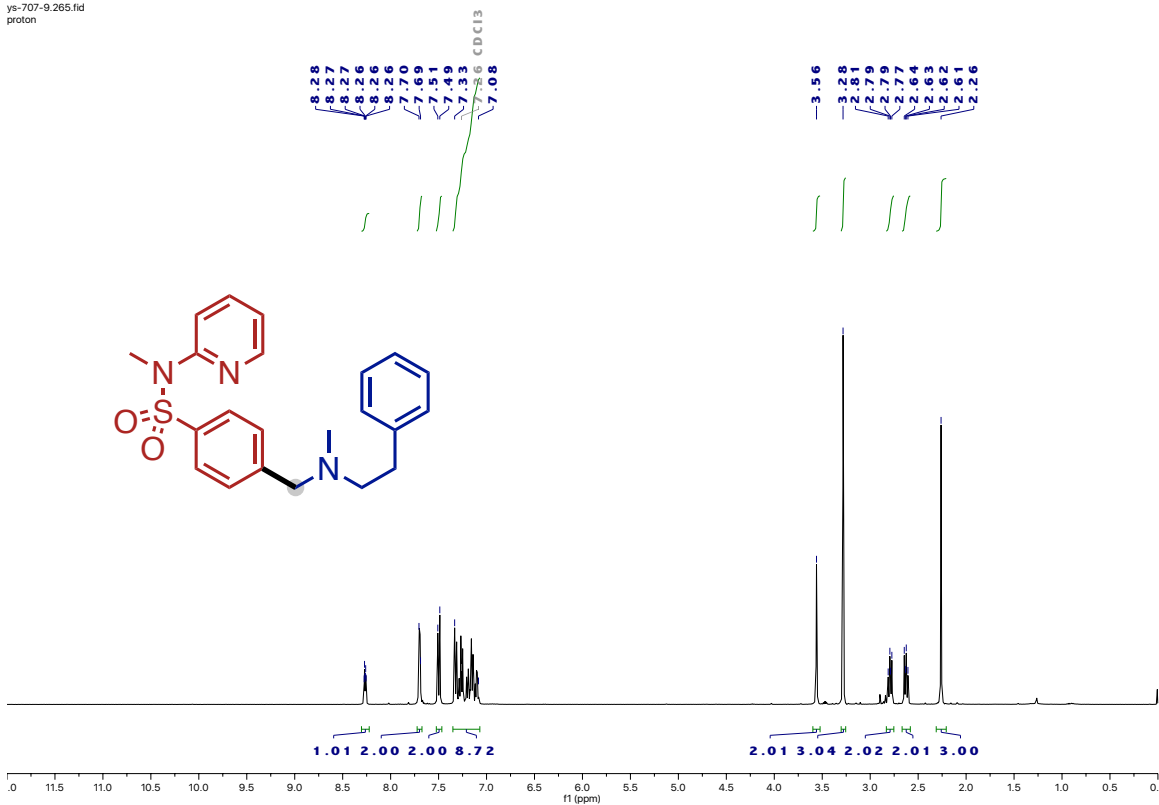

ys-707-9-c13.266.fid

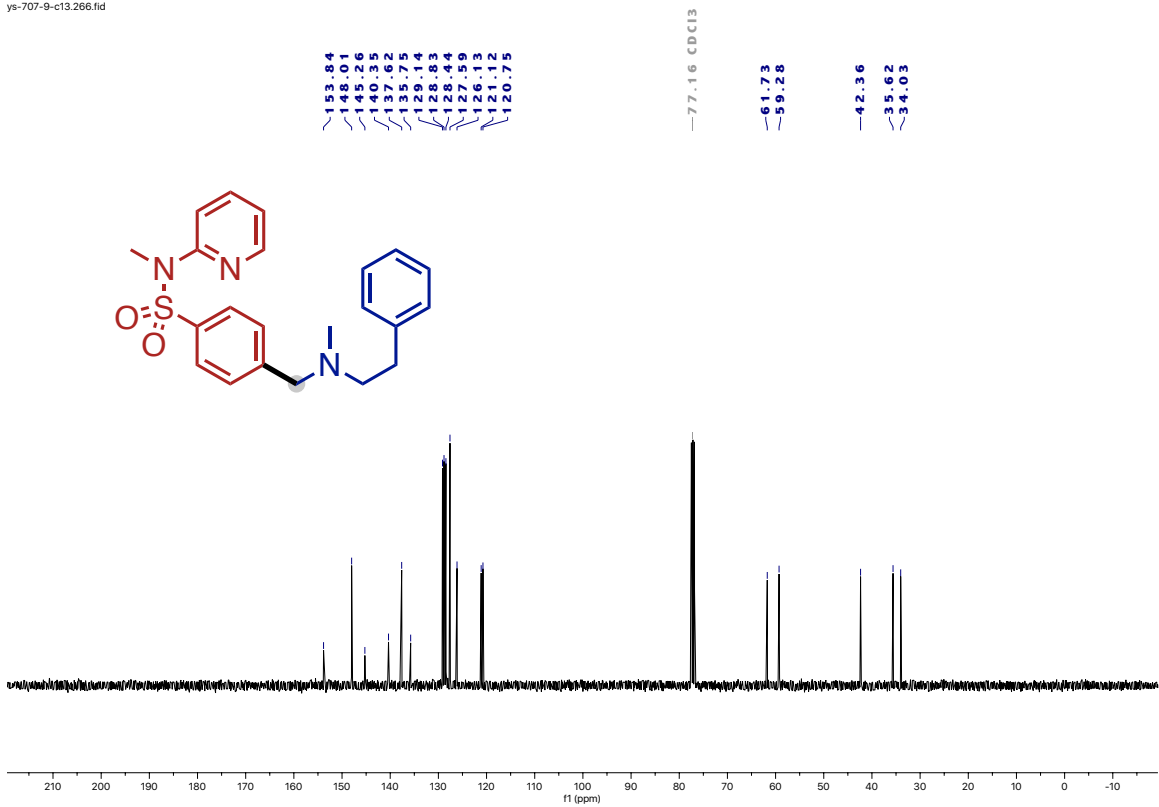

ys-724-a.280.fid  
proton

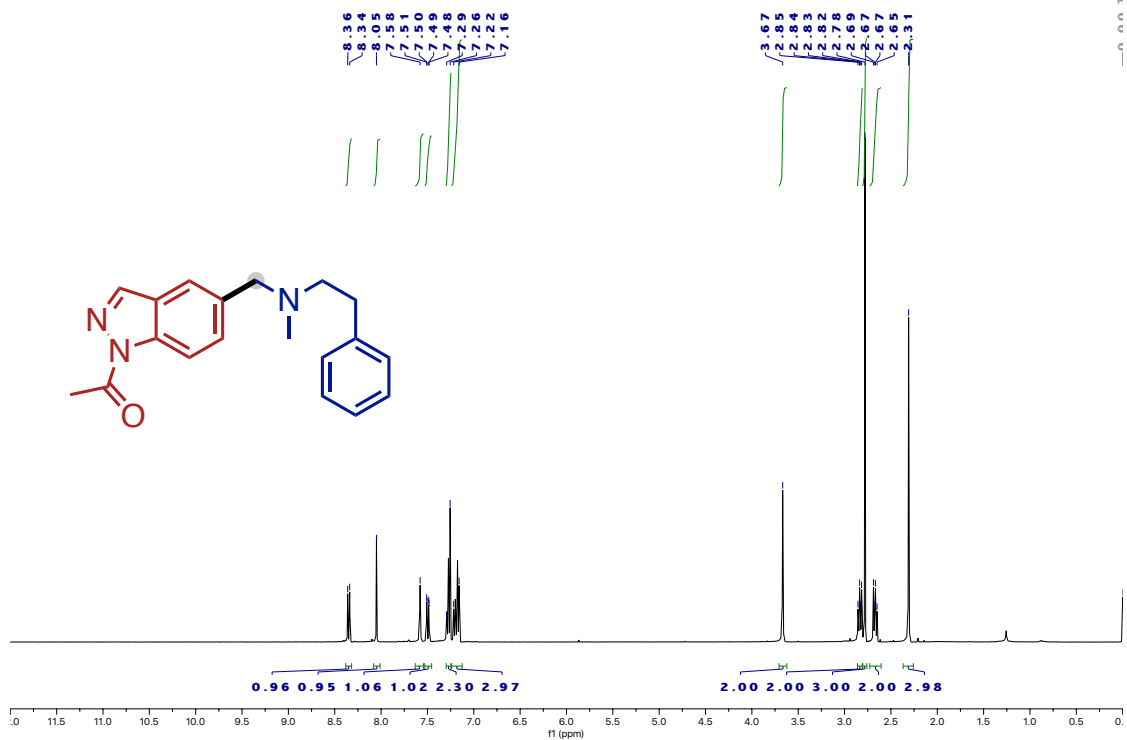

ys-724-a-c13.281.fid

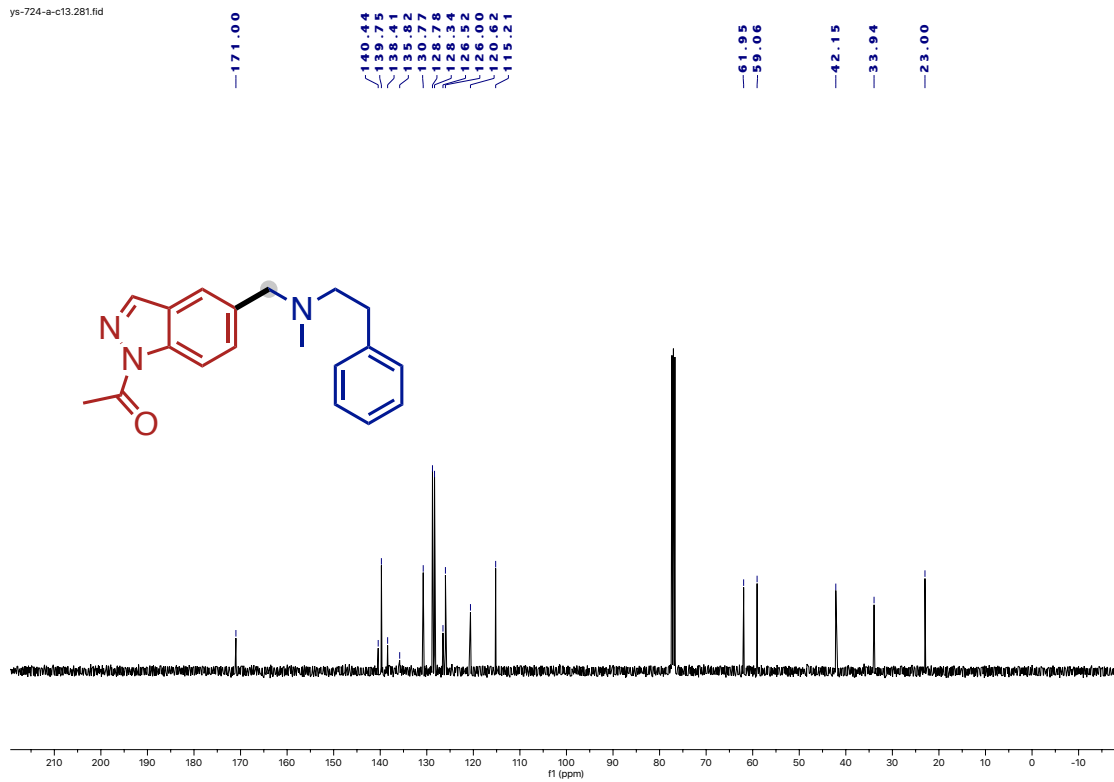

ys-722.276.fid  
proton

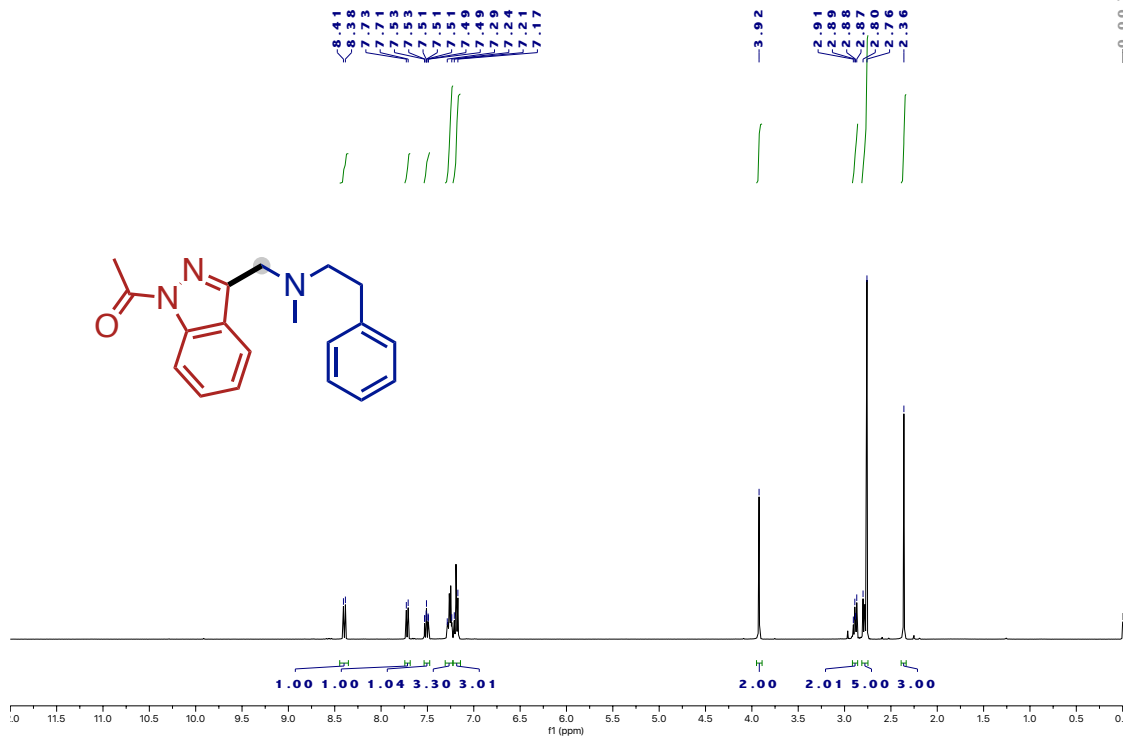

ys-722-c13.277.fid

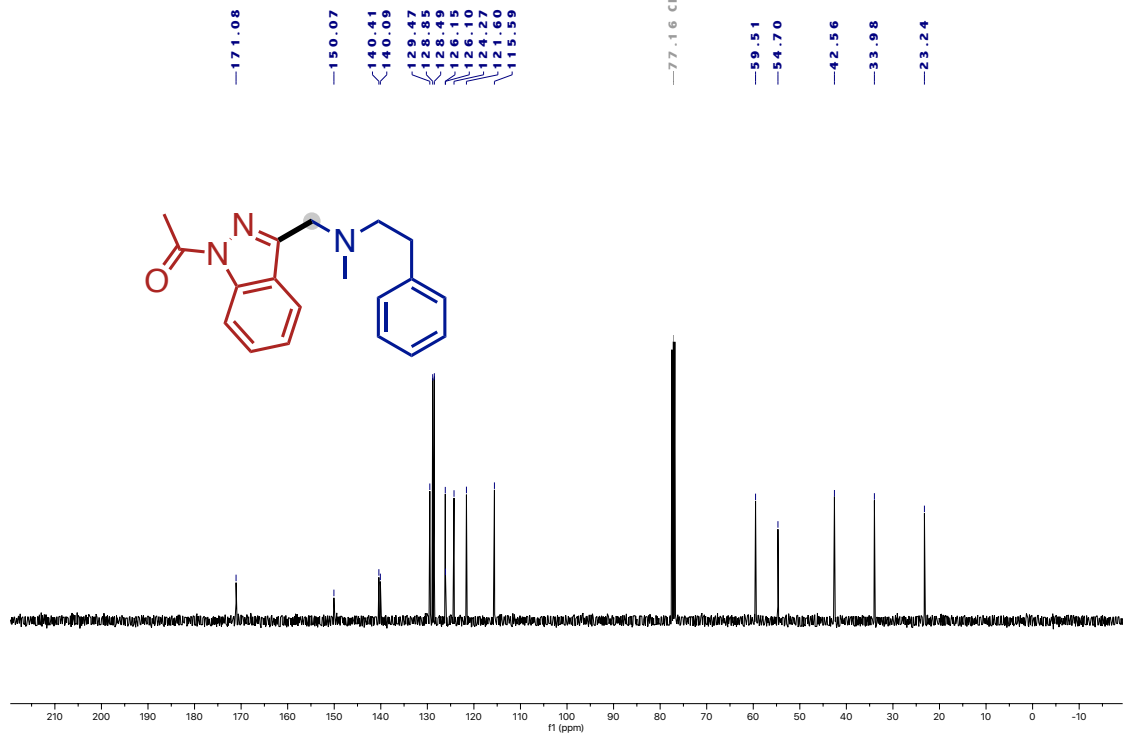

ys-718.365.fid

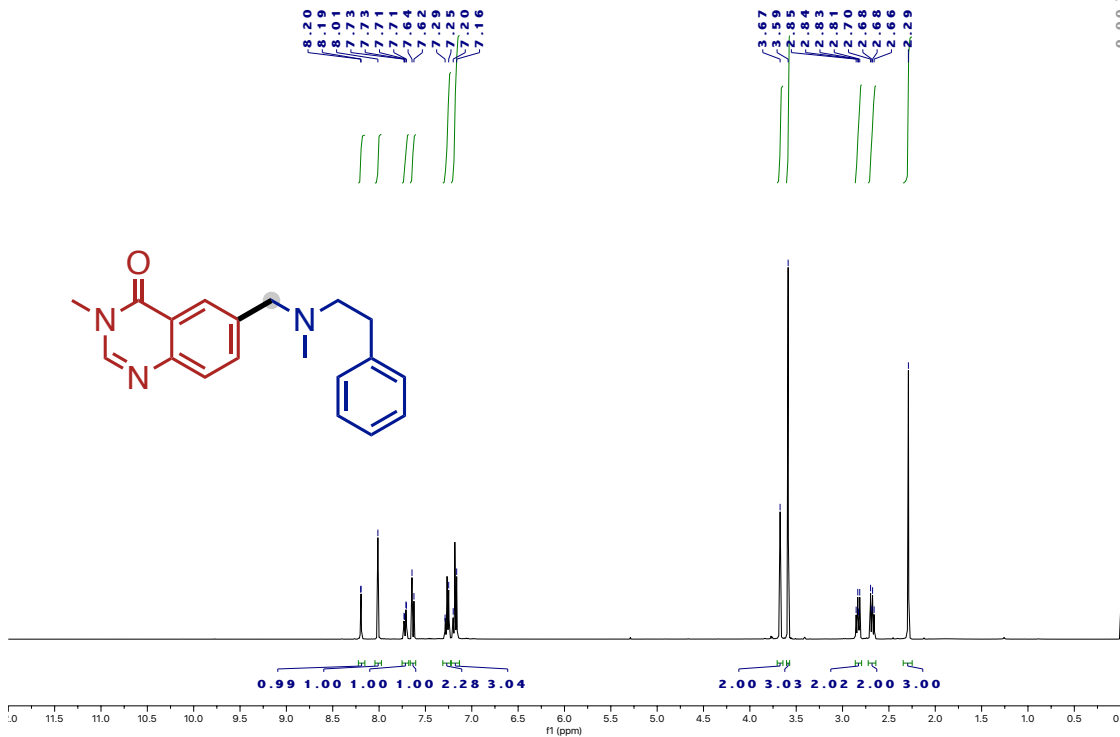

0.00 TMS

ys-718-c13.366.fid  
carbon 13

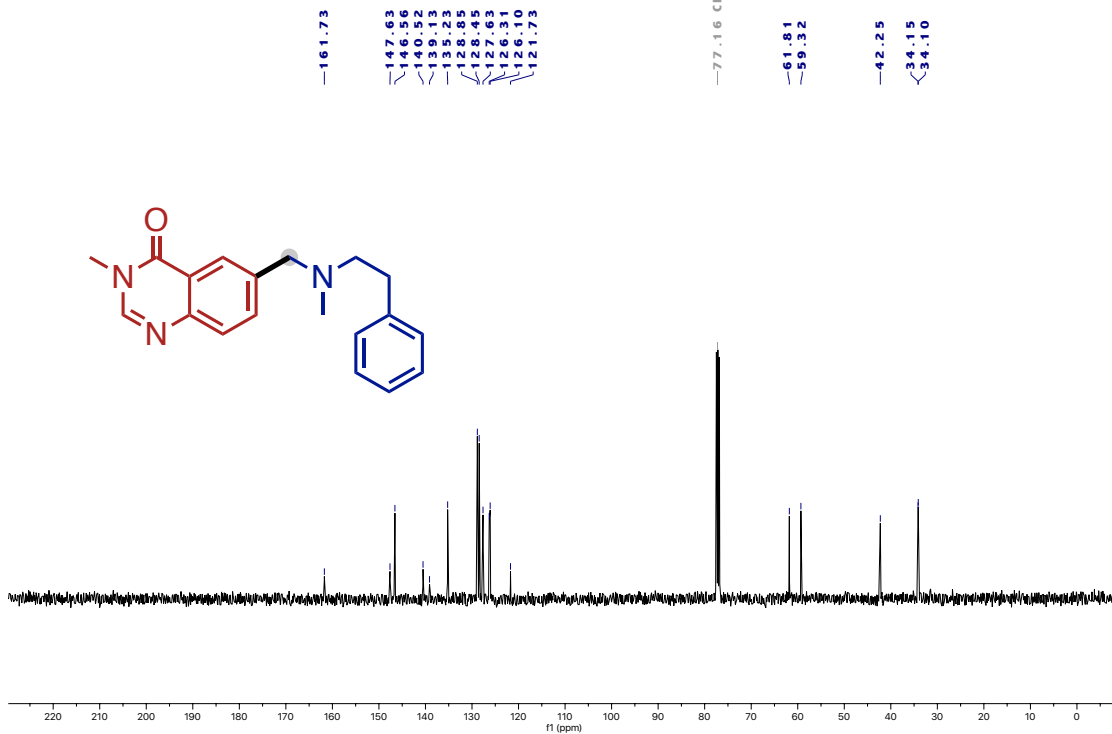

ys-691a.261.fid  
proton

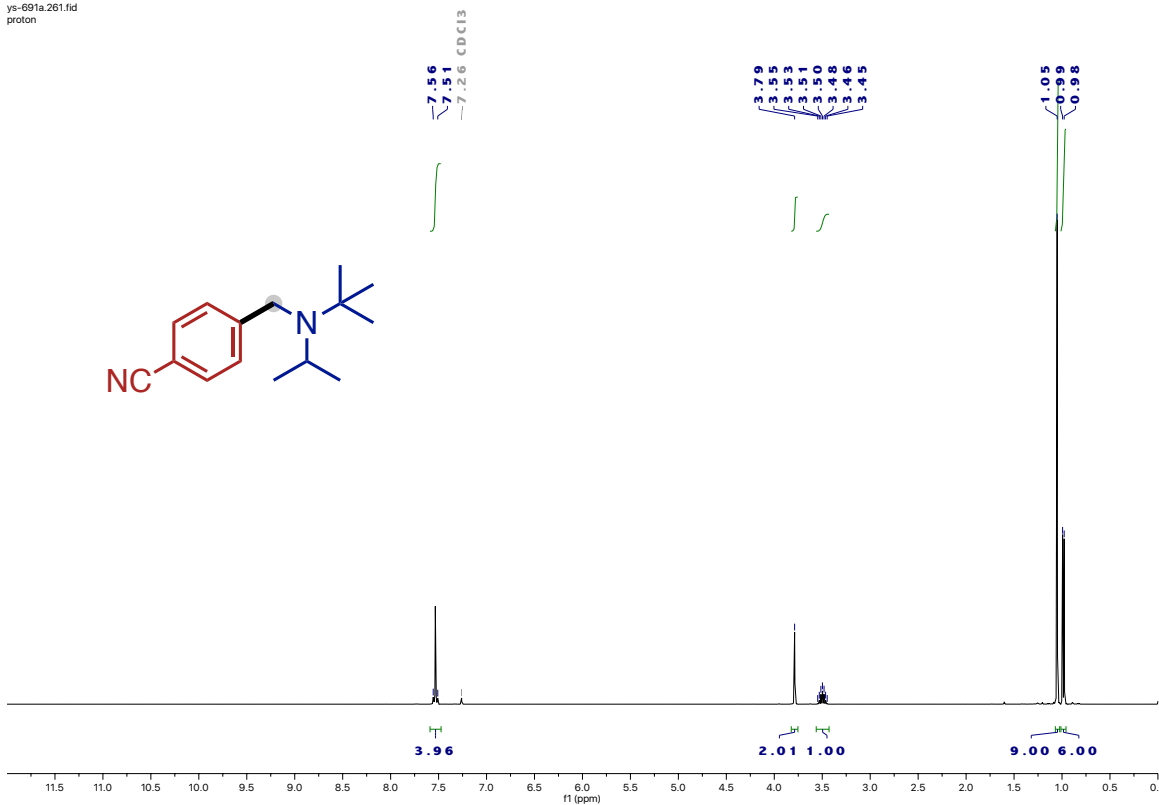

ys-691a-c13.262.fid

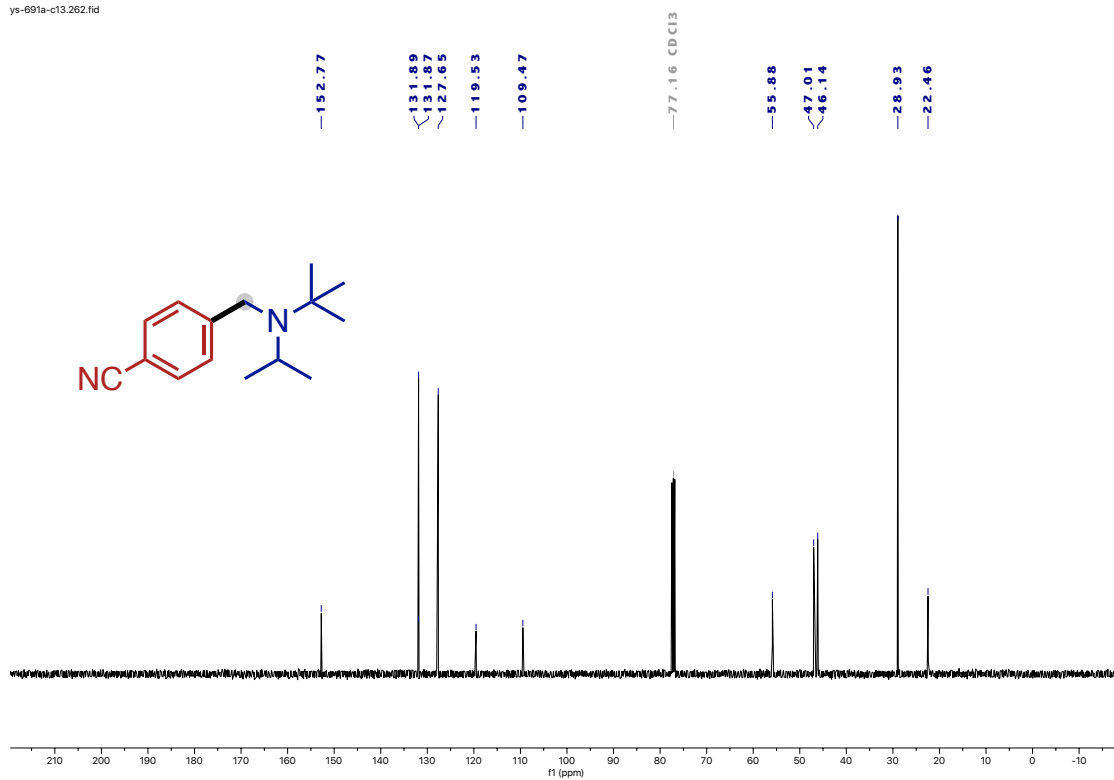

ys-692-5.252.fid  
proton

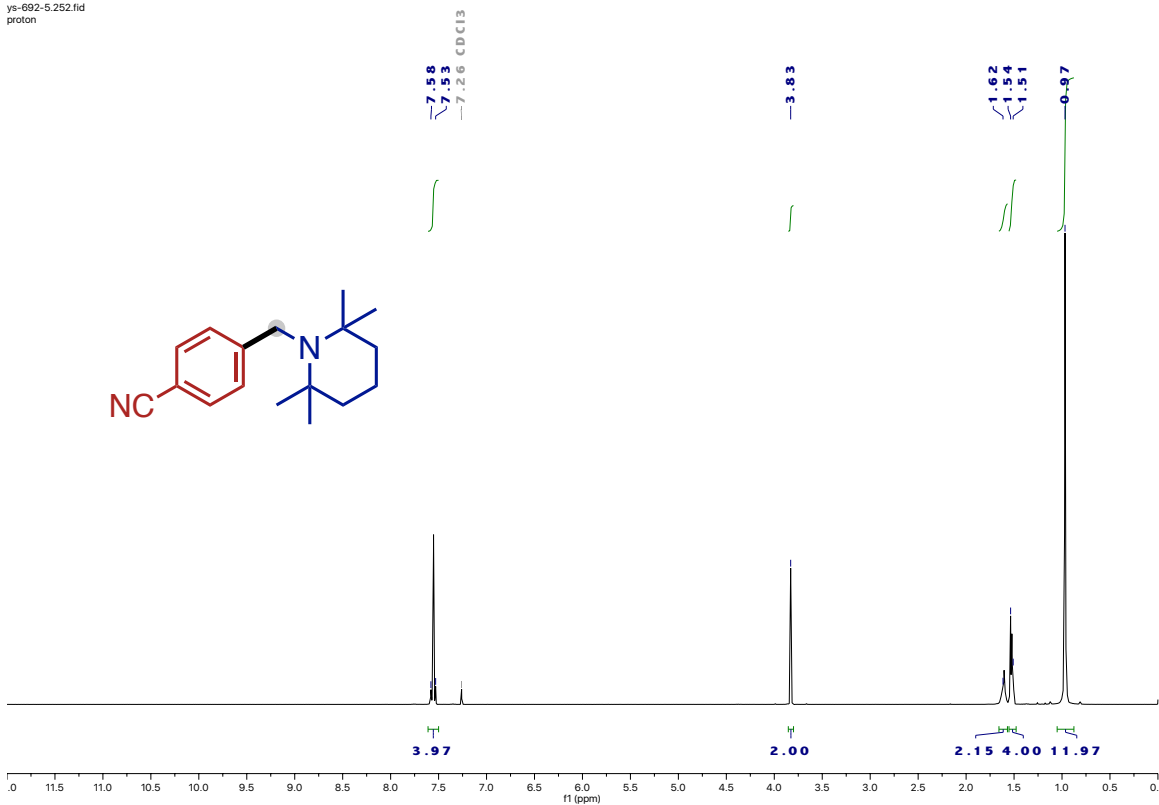

ys-692-5-c13.253.fid

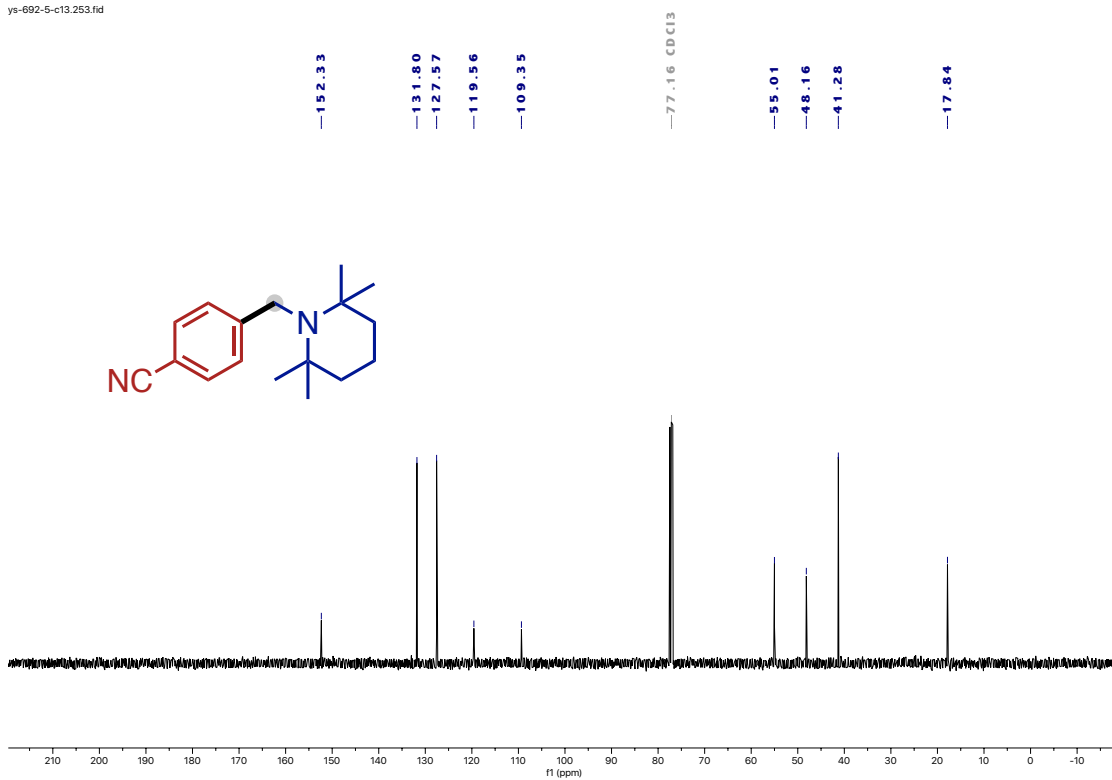



ys-779-2.335.fid  
proton

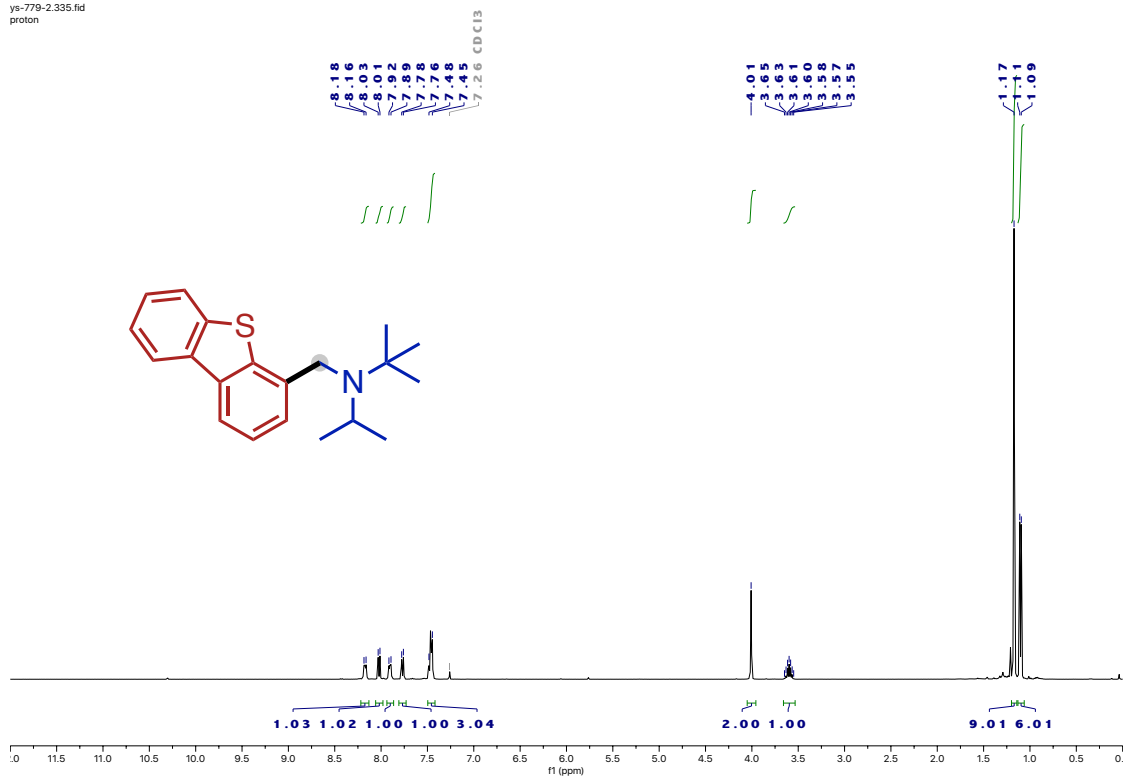

ys-779-2-e-c13.342.fid

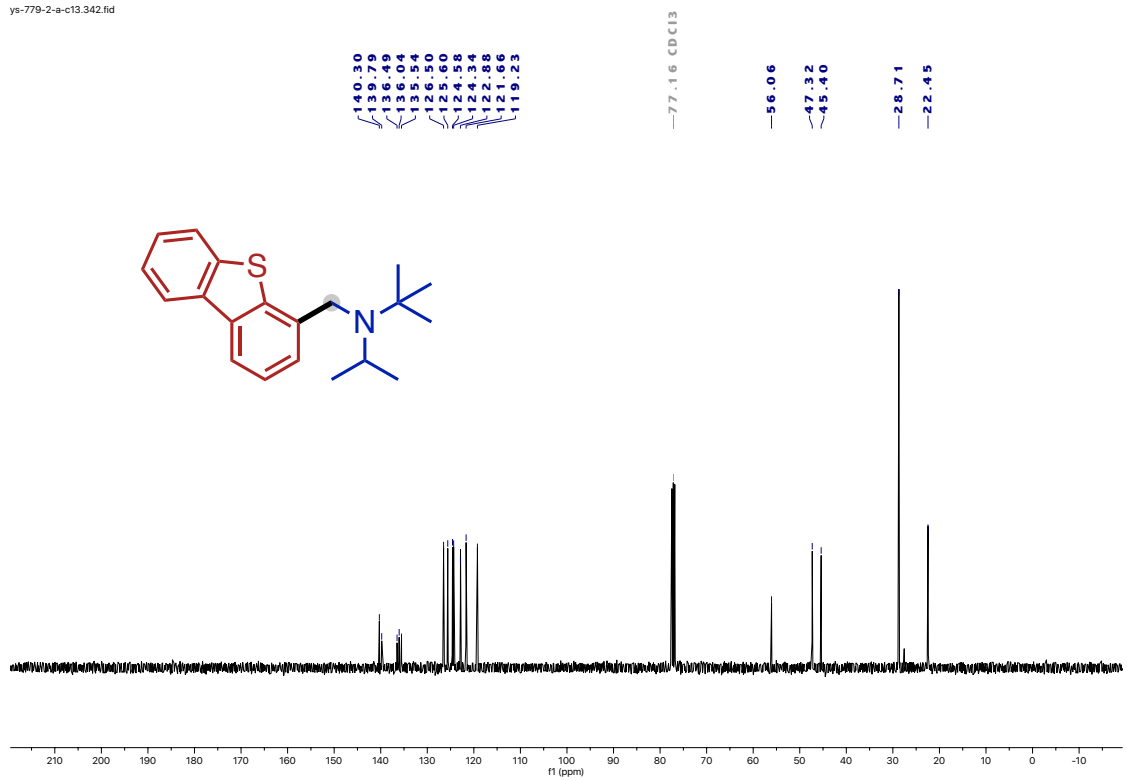

ys-714-1.363.fid

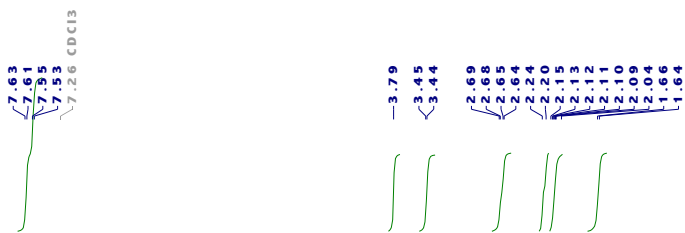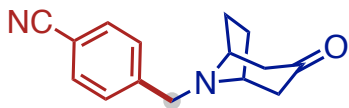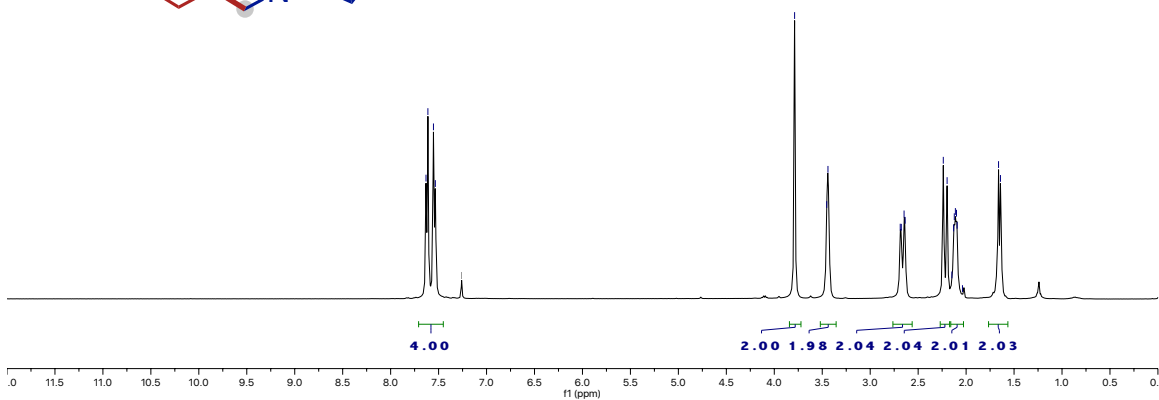

ys-714--c13--aa.270.fid

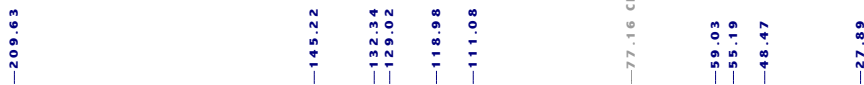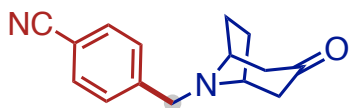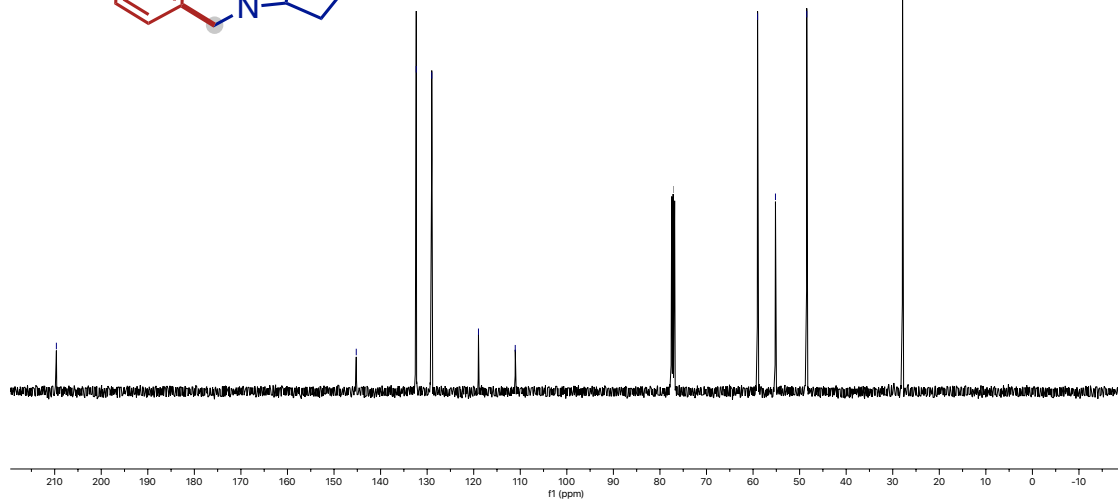

ys-857.1.fid

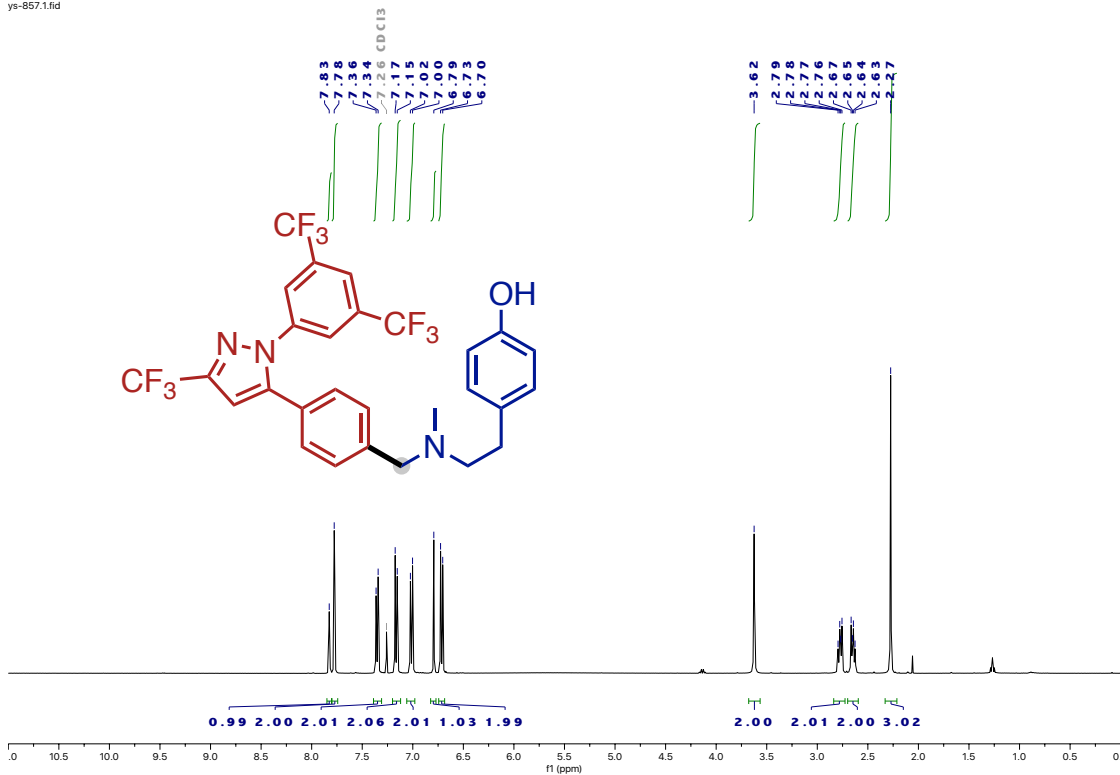

ys-857.2.fid

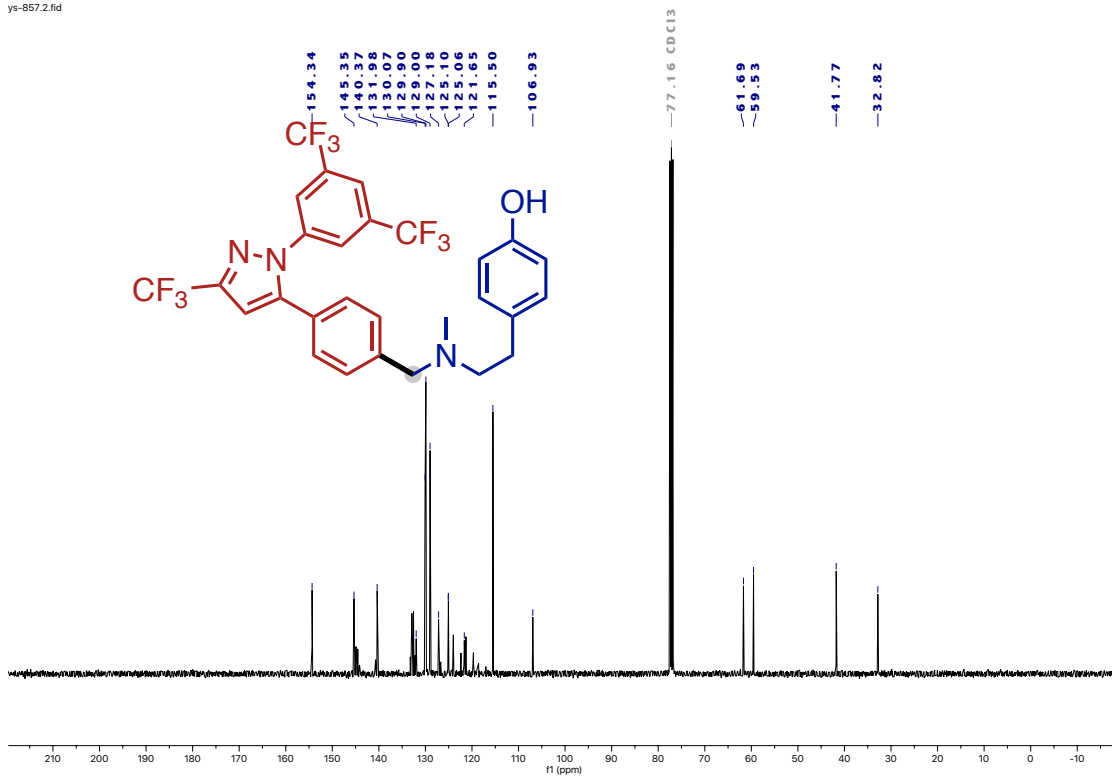

ys-857.3.fid

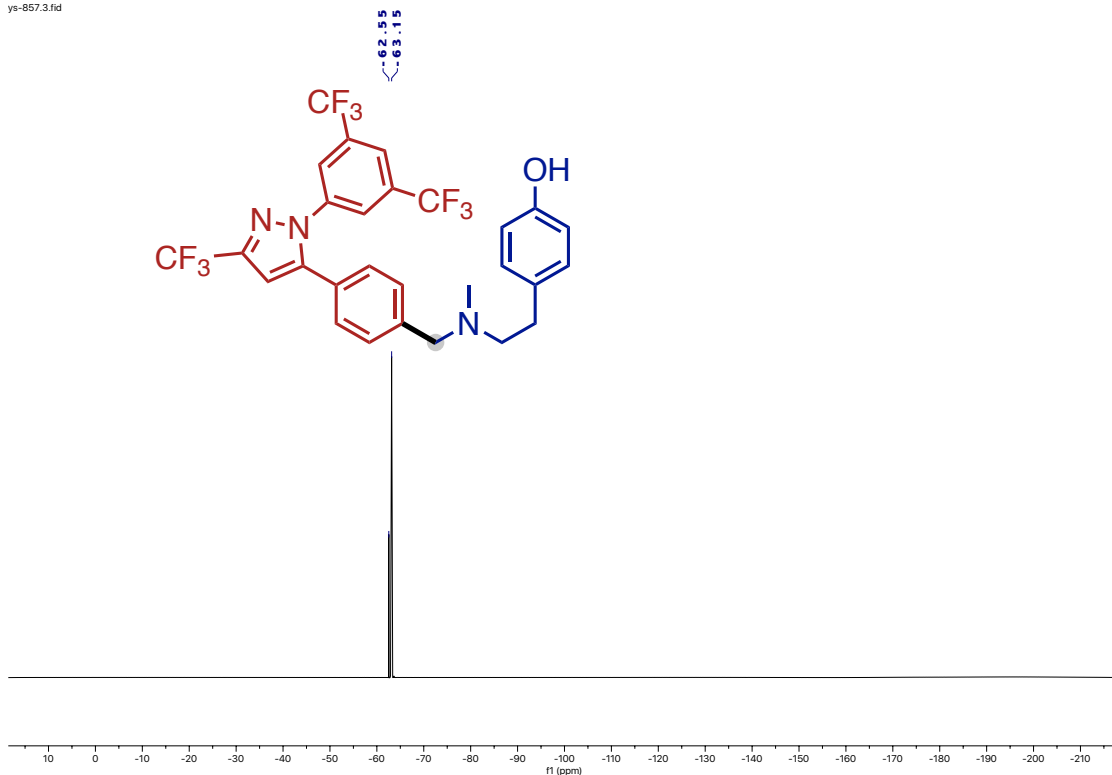

ys-716.359.fid

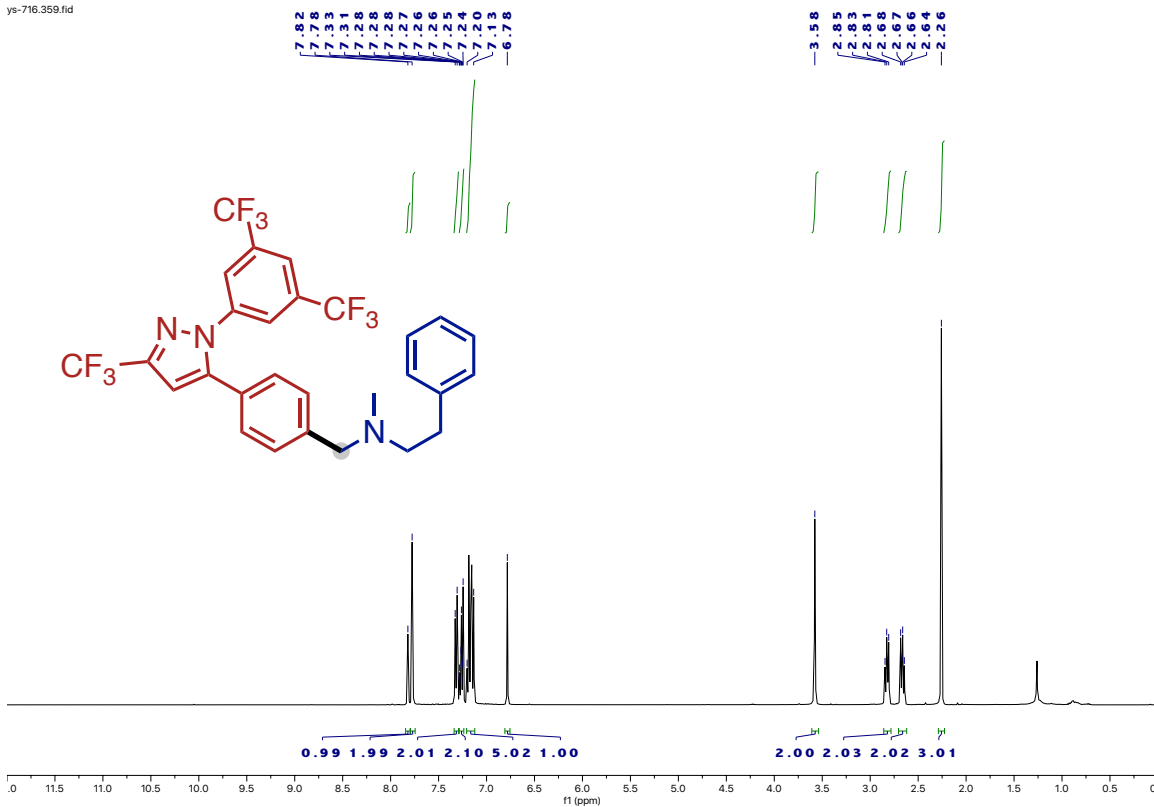

ys-716-c13.360.fid  
carbon 13

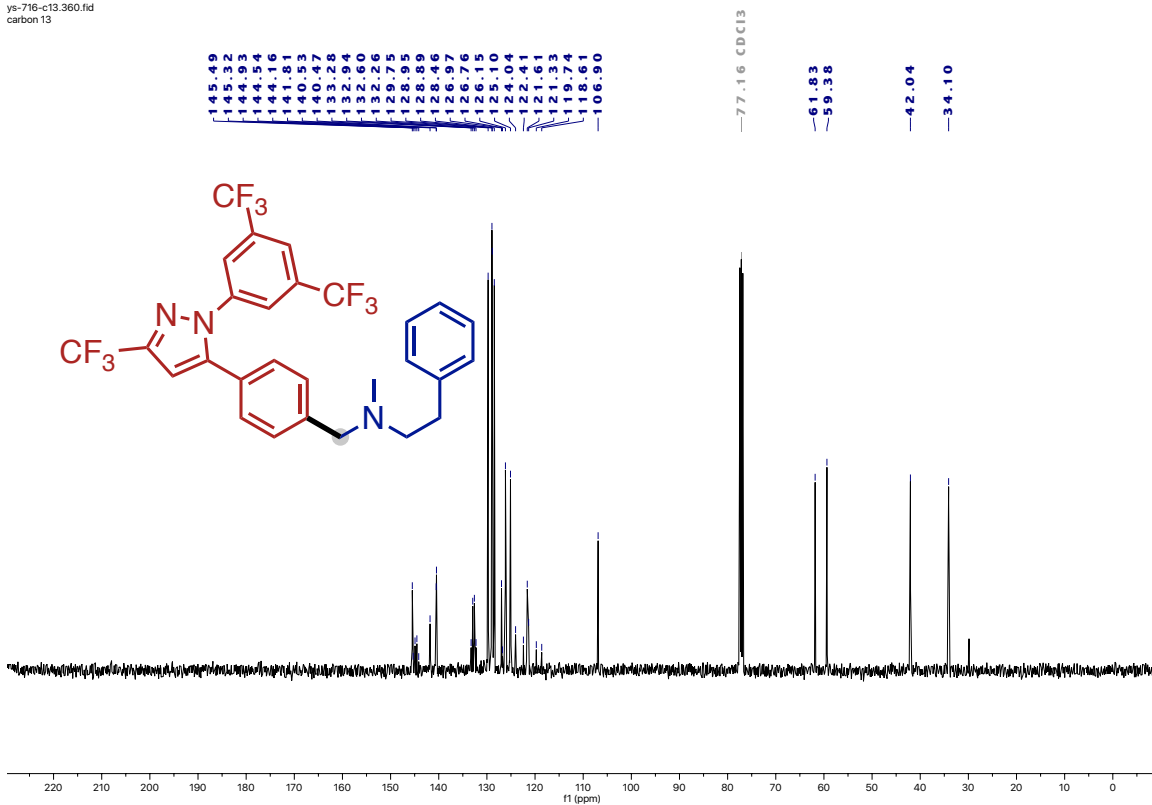

ys-716-4.271.fid  
F19

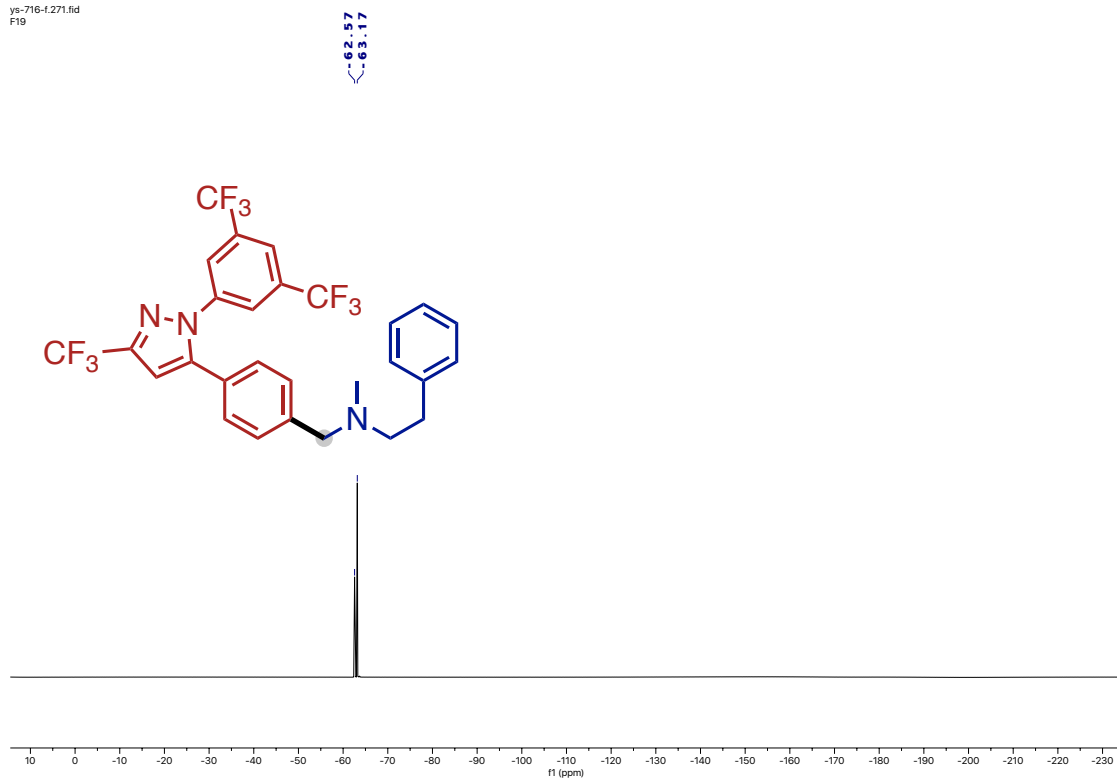

ys-717-b.278.fid

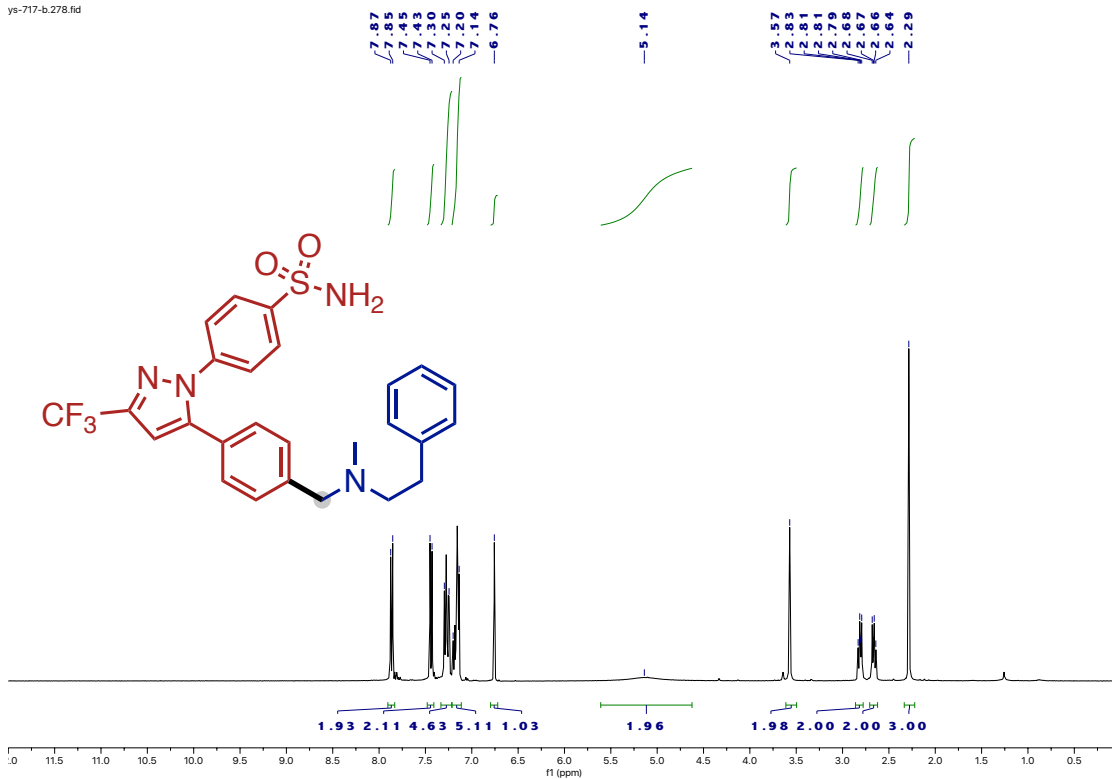

ys-717-b-c13.279.fid

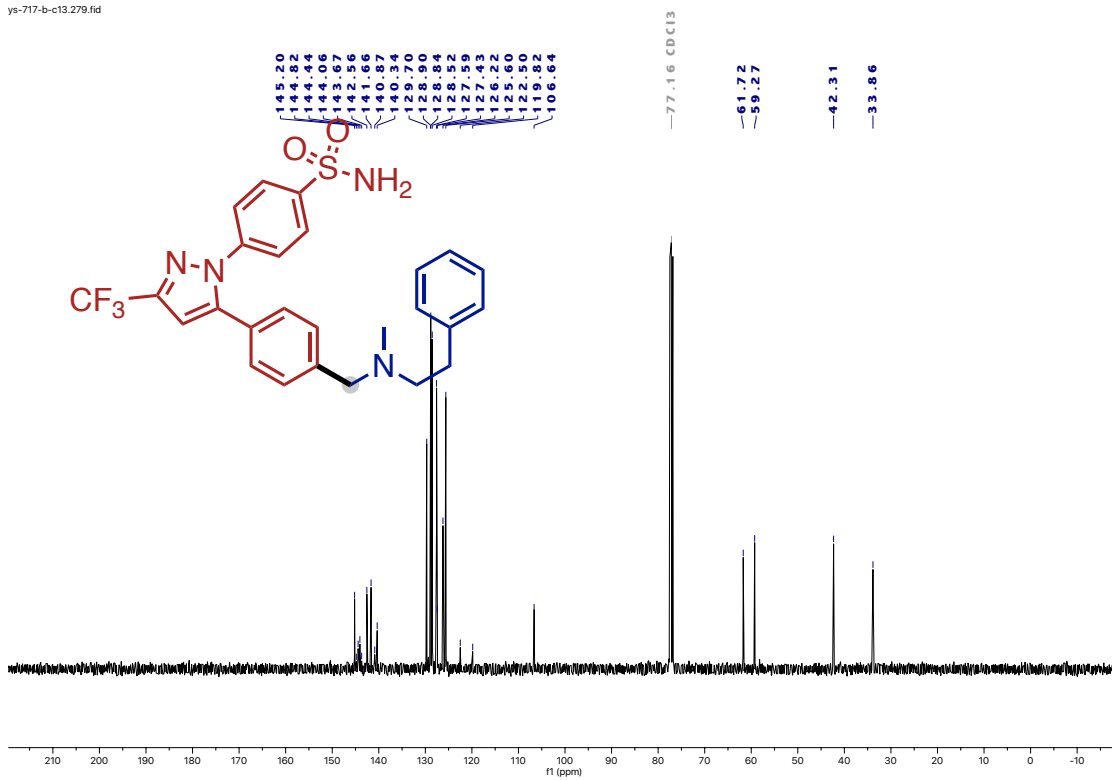

ys-717-ba-f.284.fid  
F19

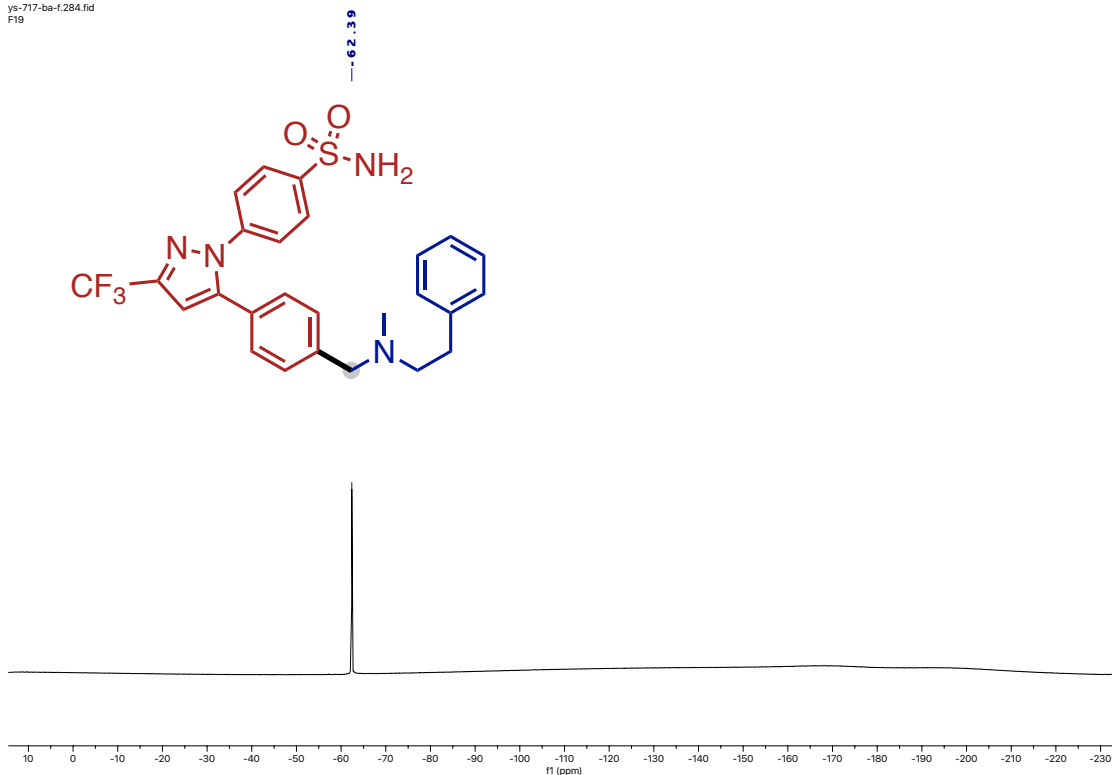

ys-863.424.fid

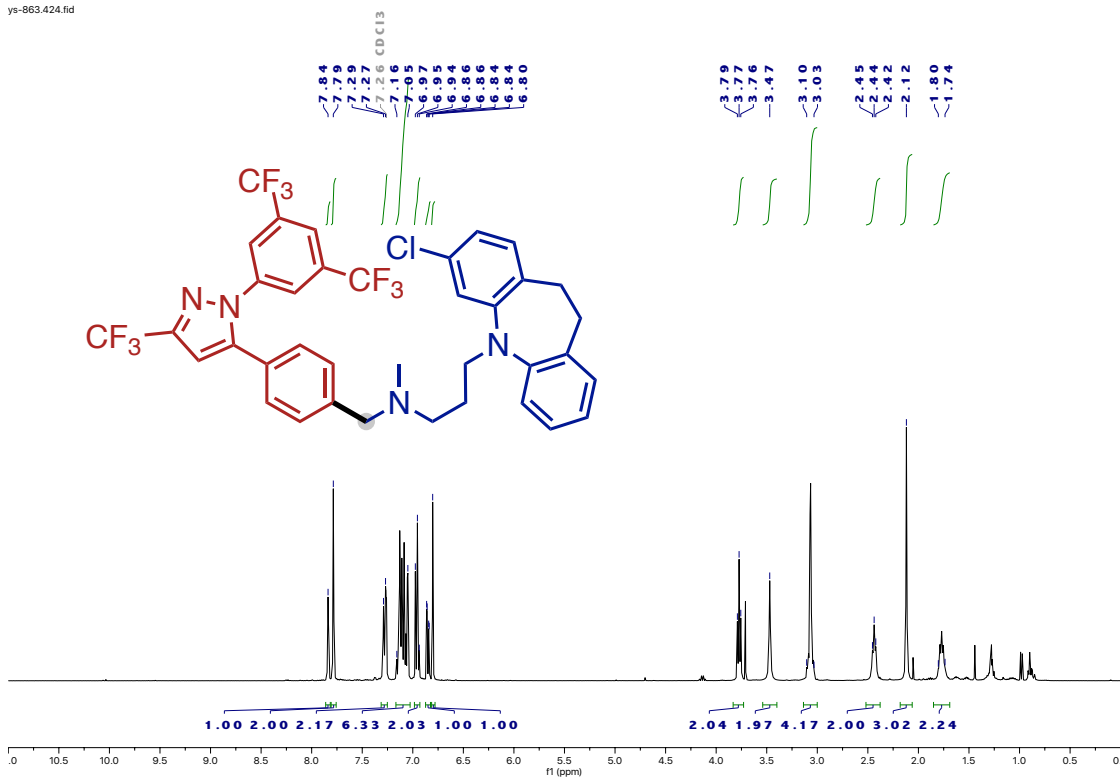

ys-863-c13.425.fid  
carbon 13

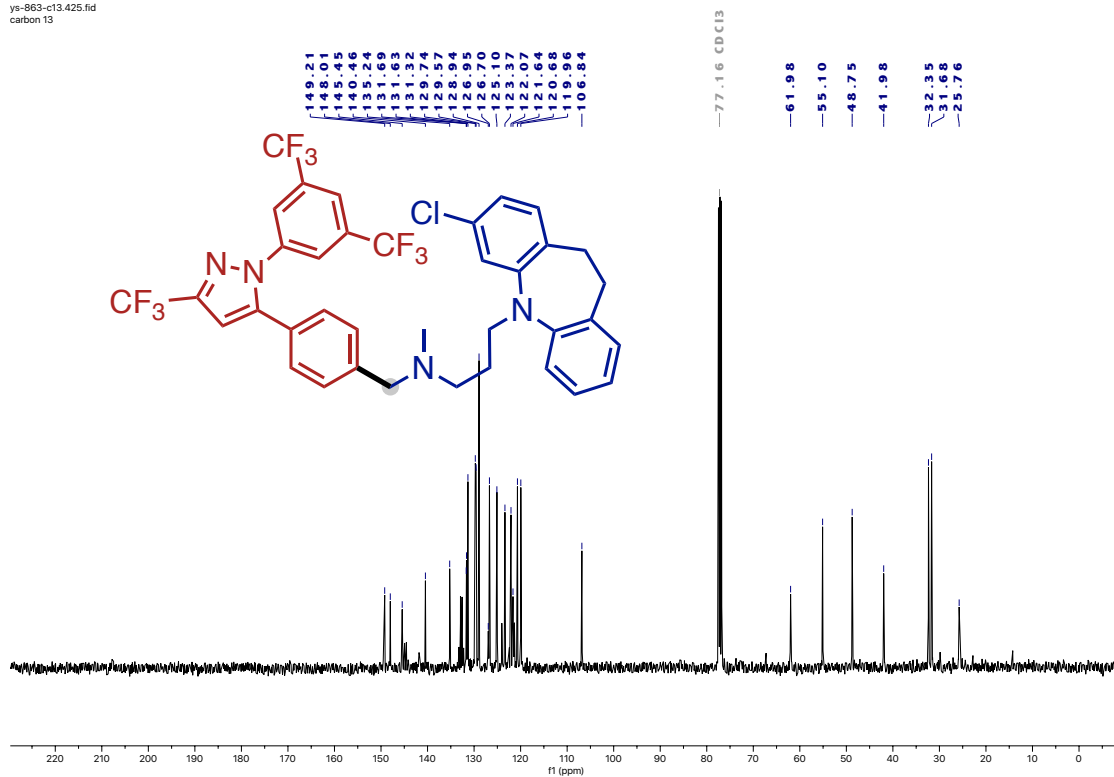

ys-863-f.389.fid  
F19

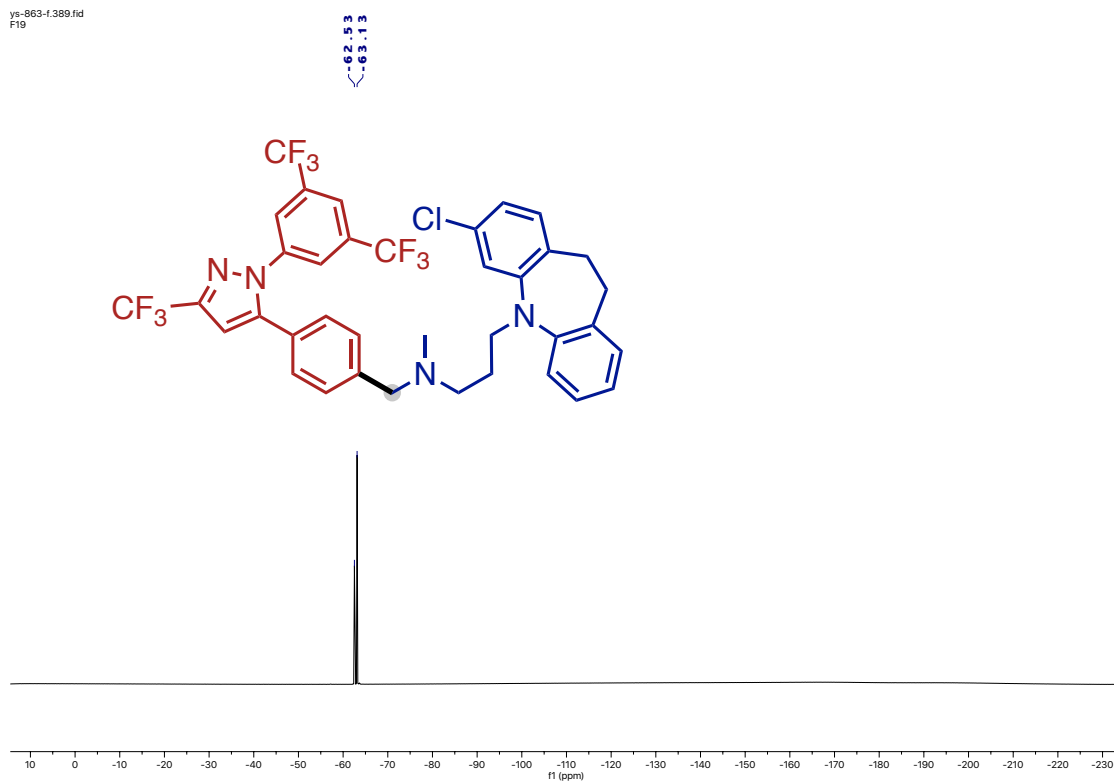



ys-854-a.418.fid

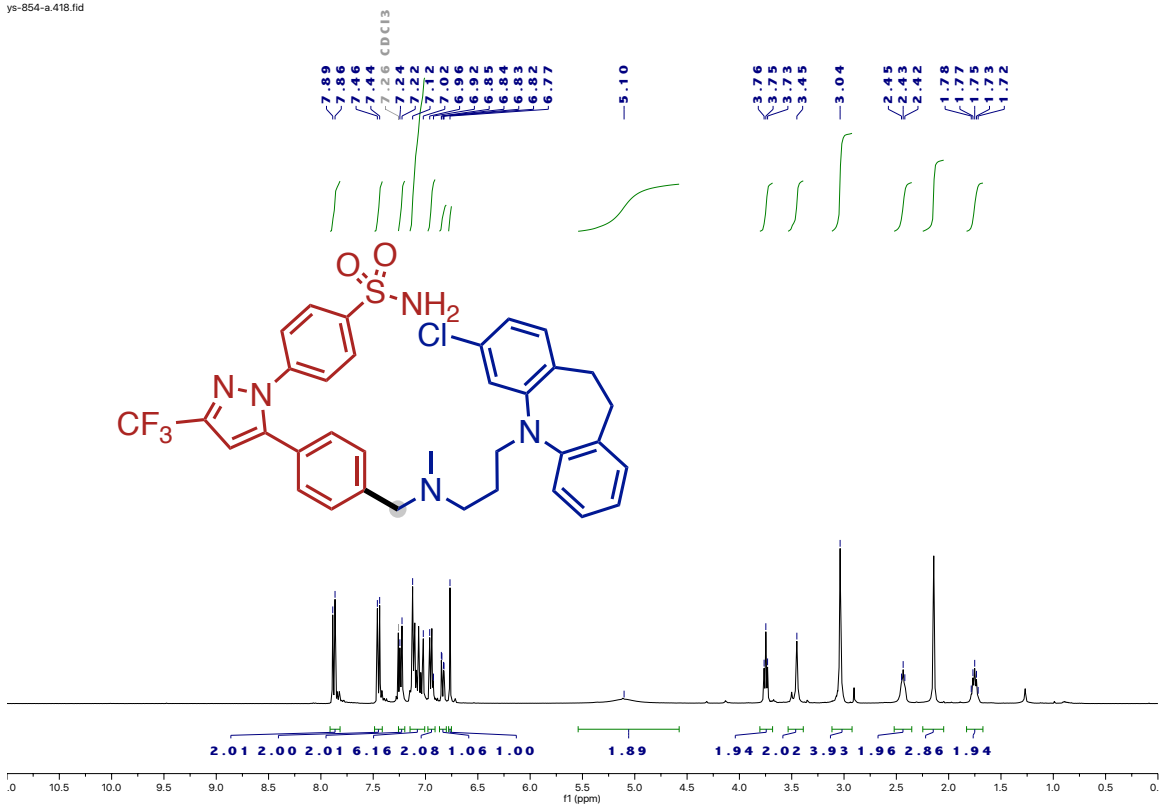

ys-854-a-c13aa.391.fid

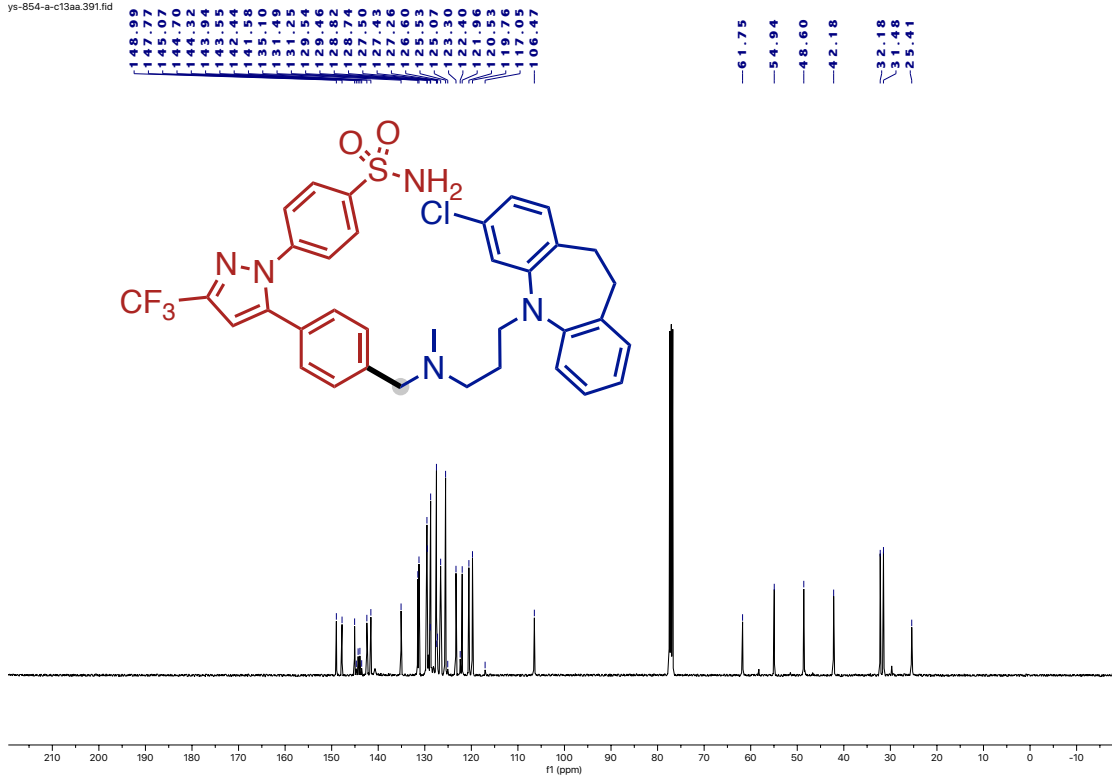

ys-854-a-f.388.fid  
F19

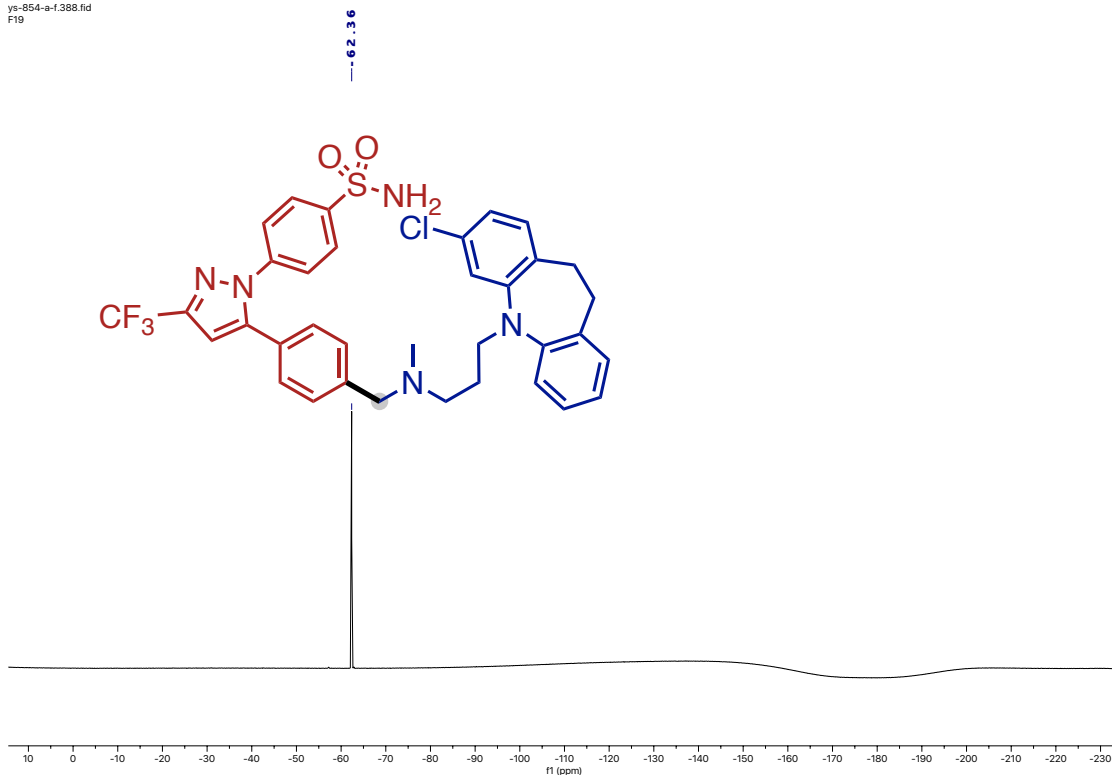

ys-848-1.371.fid  
proton

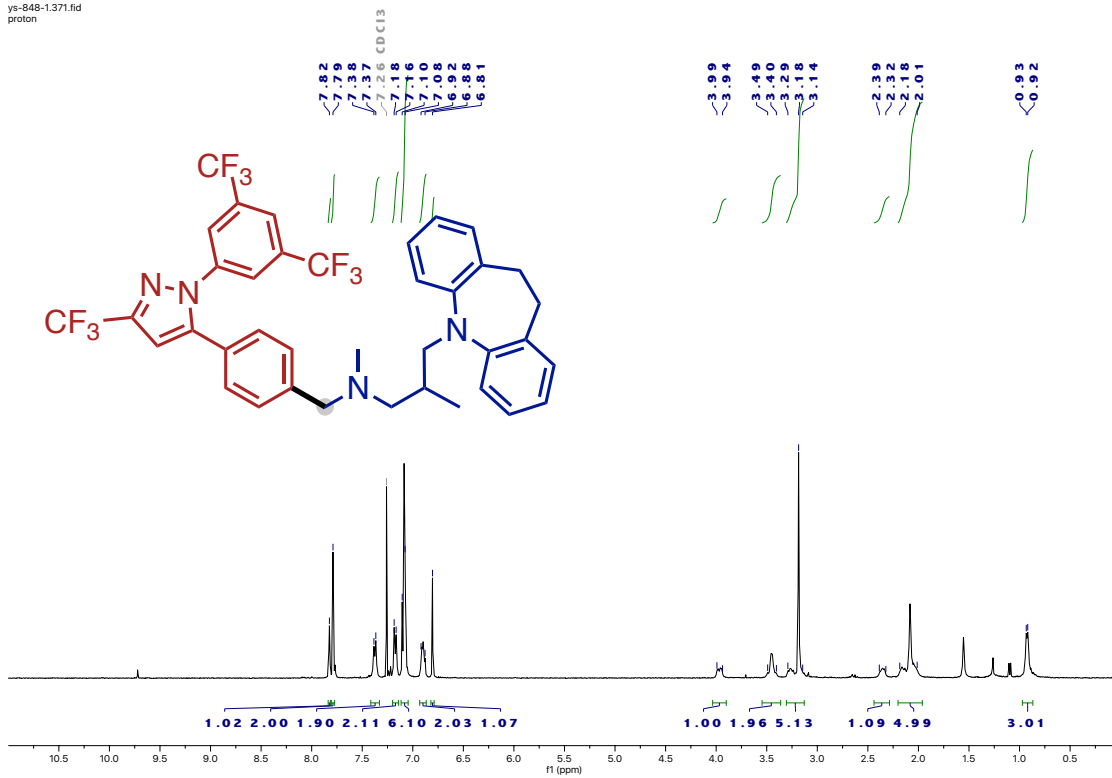

ys-847aa-c13.1.fid

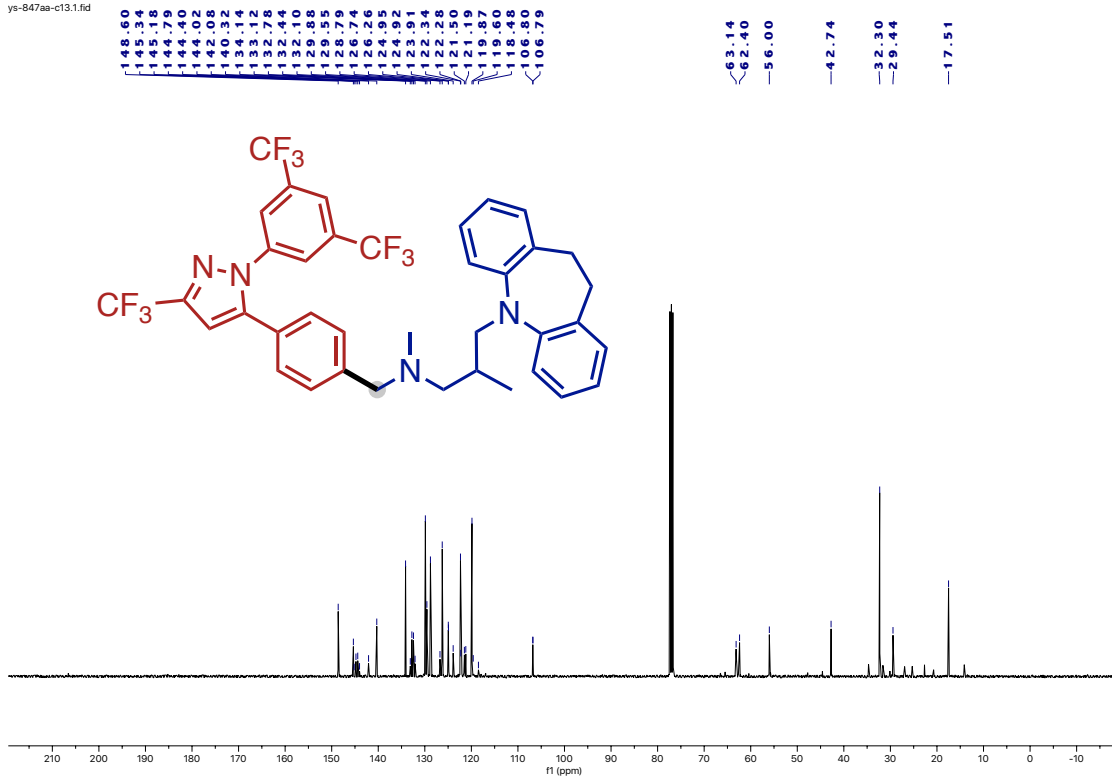

ys-848-1-f.374.fid  
F19

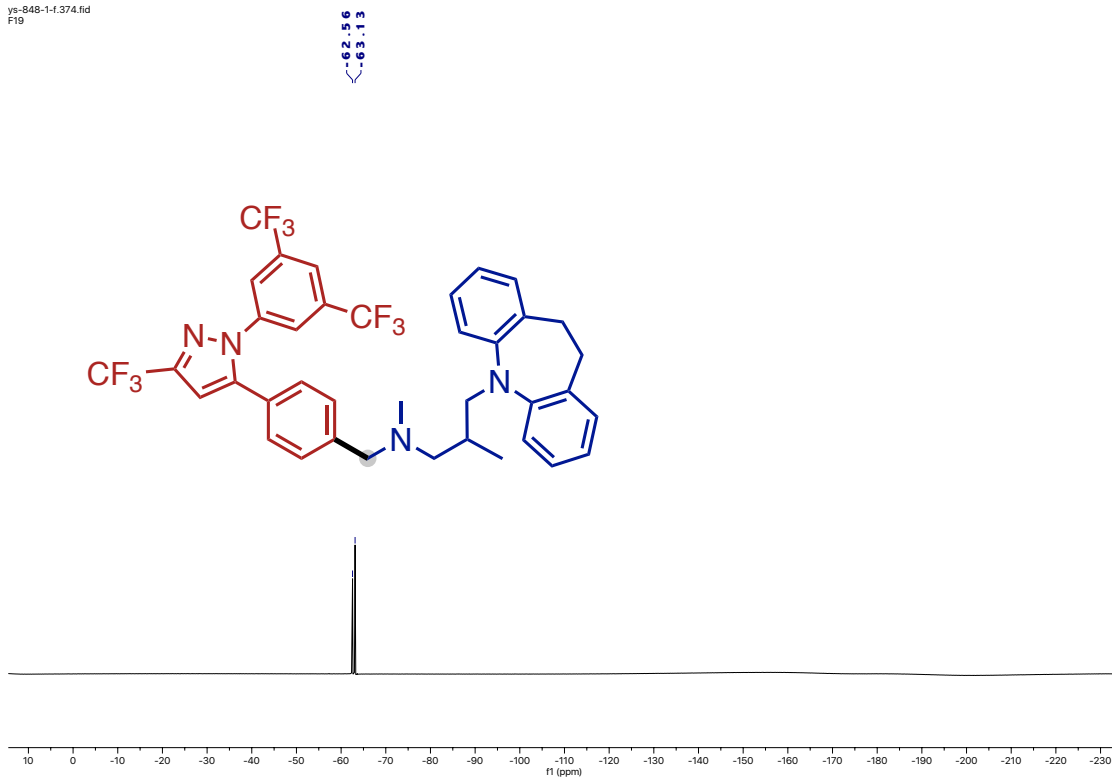

ys-860.1.fid

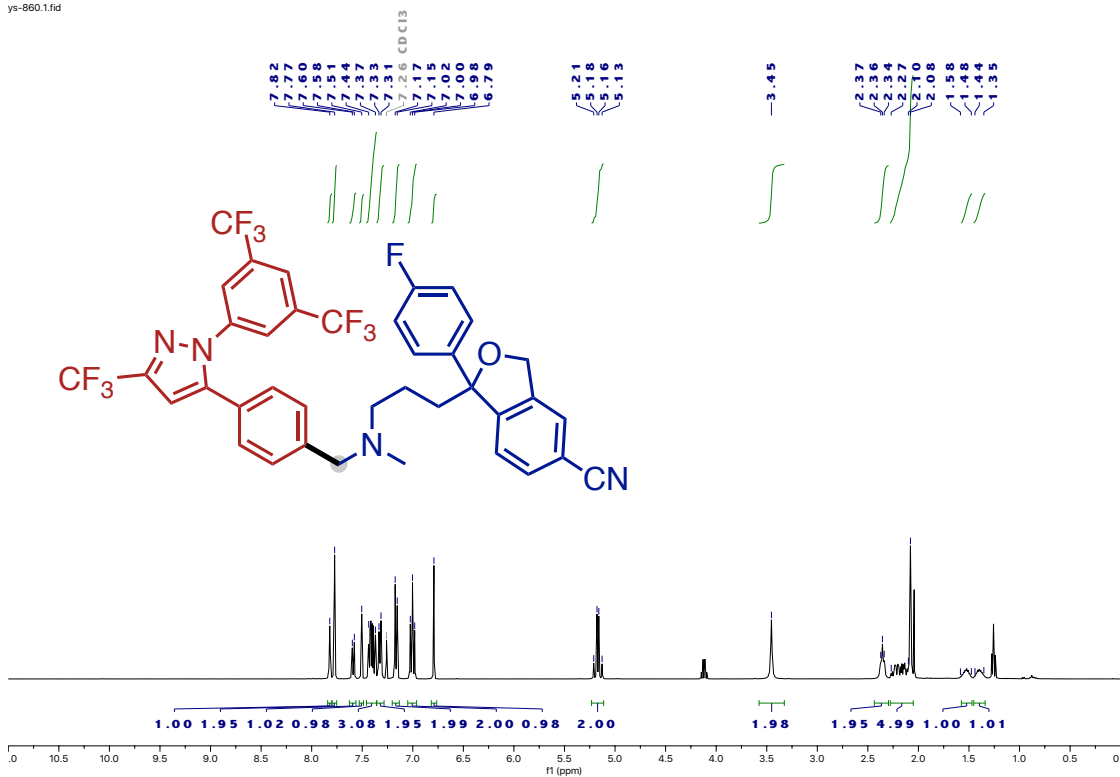

ys-860.2.fid

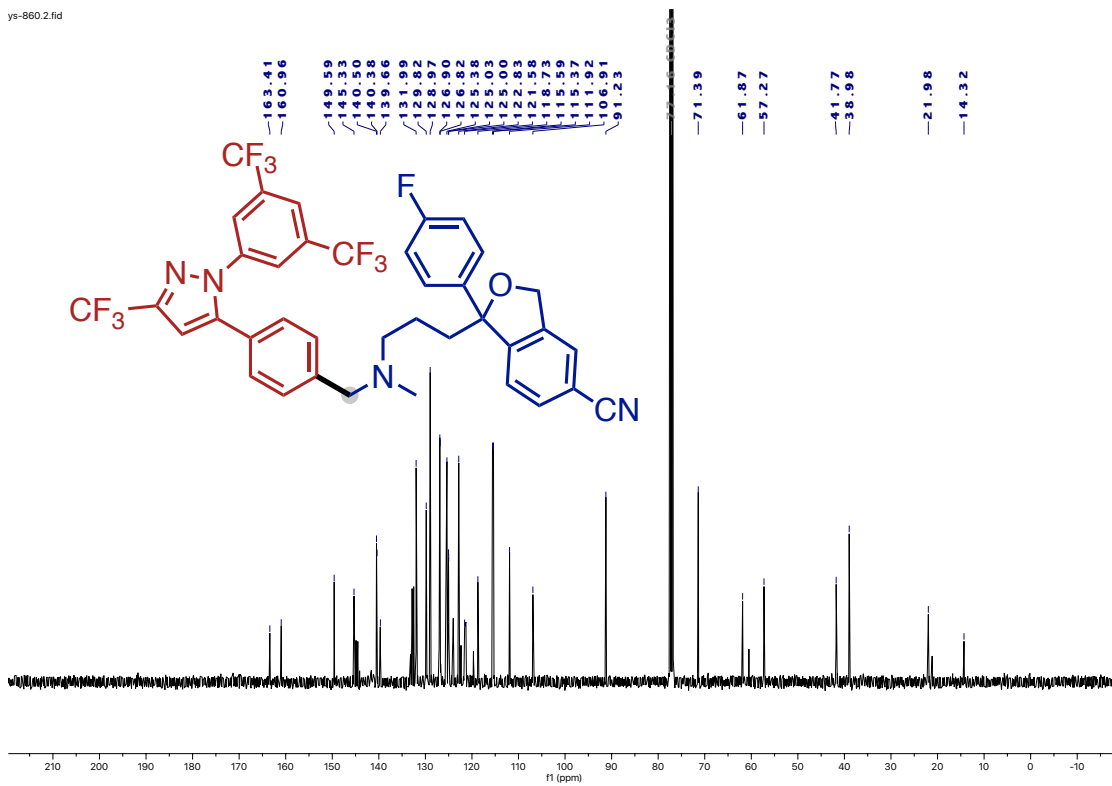

ys-860.3.fid

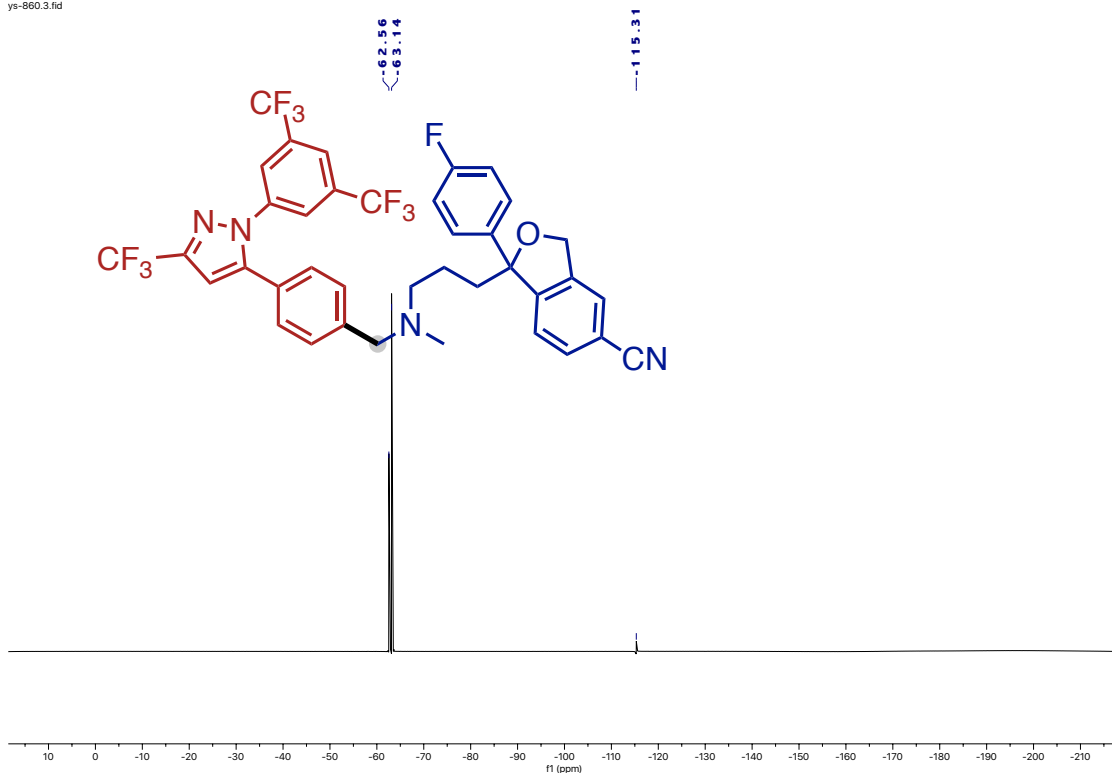

ys-850.377.fid  
proton

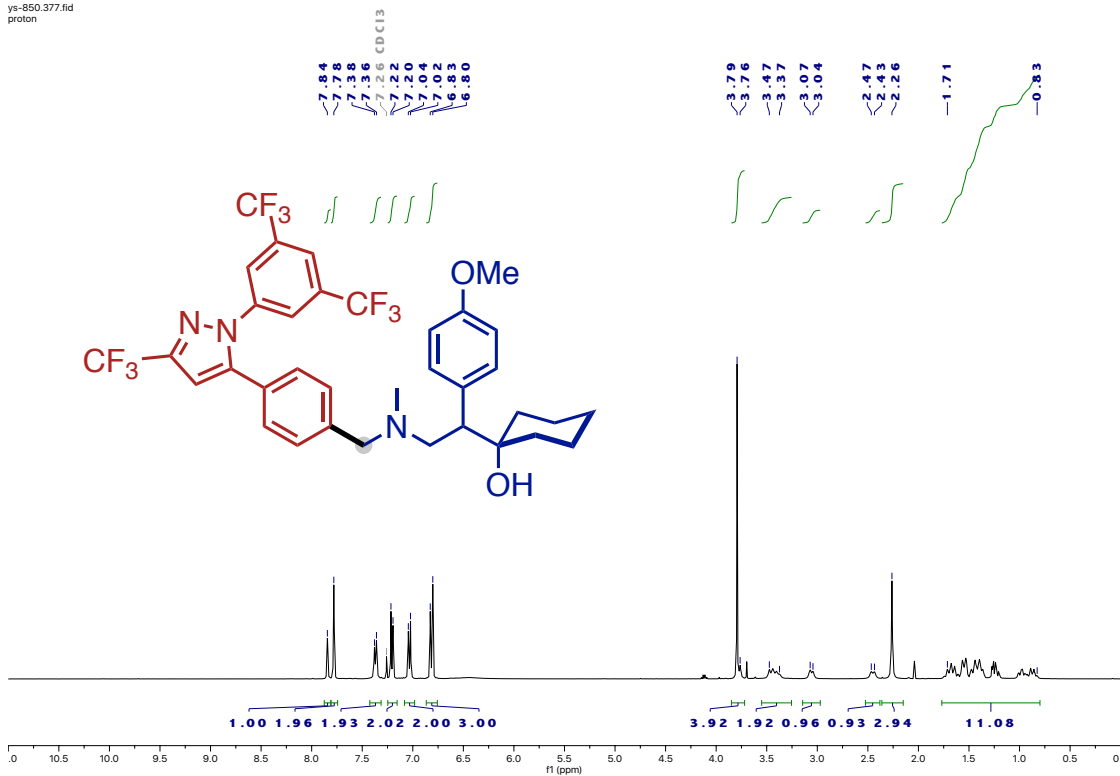

ys-850-c13.379.fid

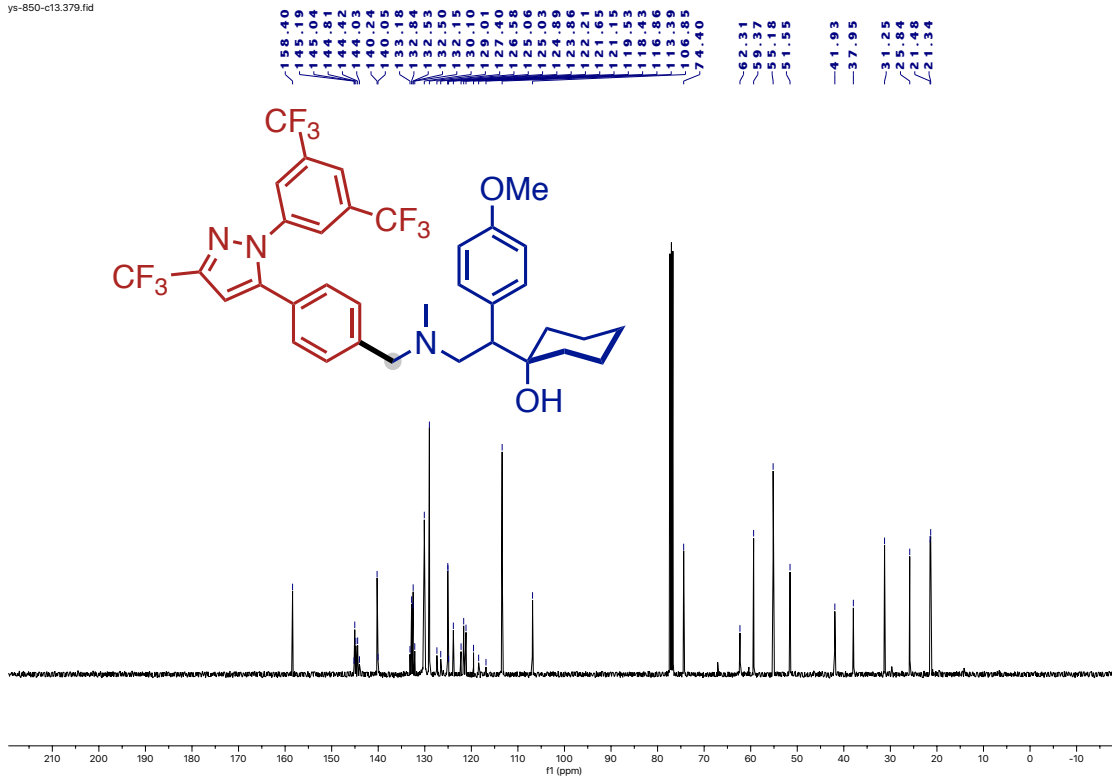

ys-850-f.378.fid  
F19

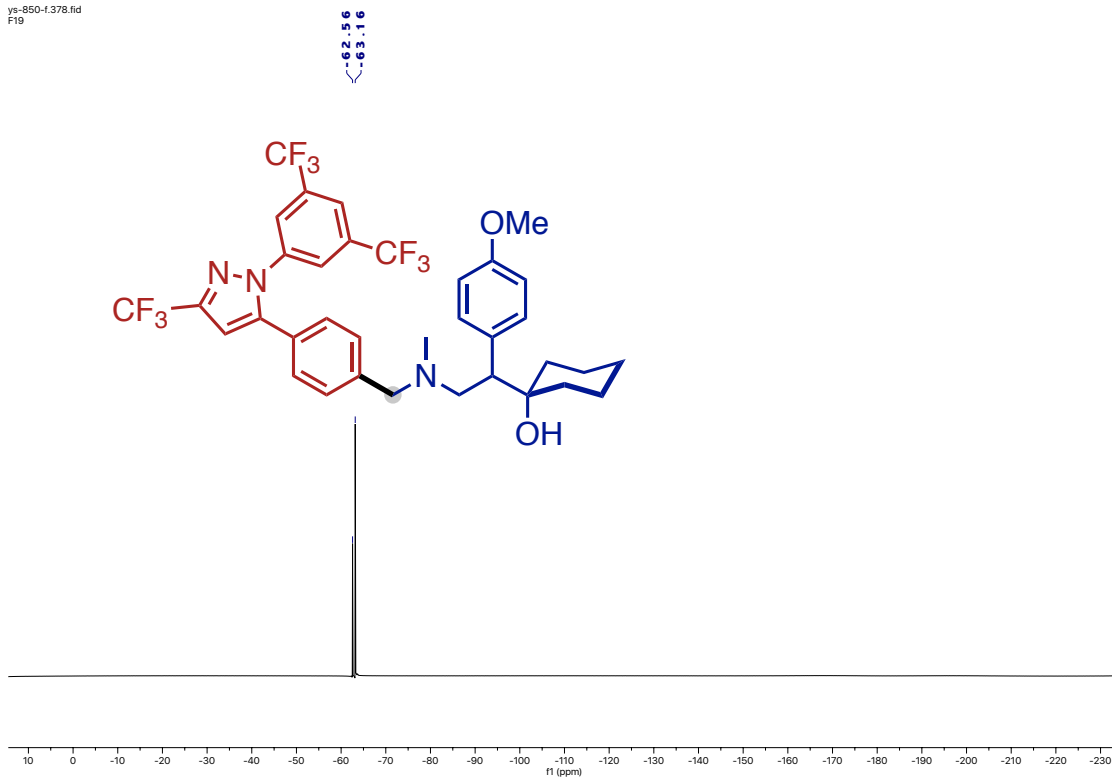

ys-847.376.fid  
proton

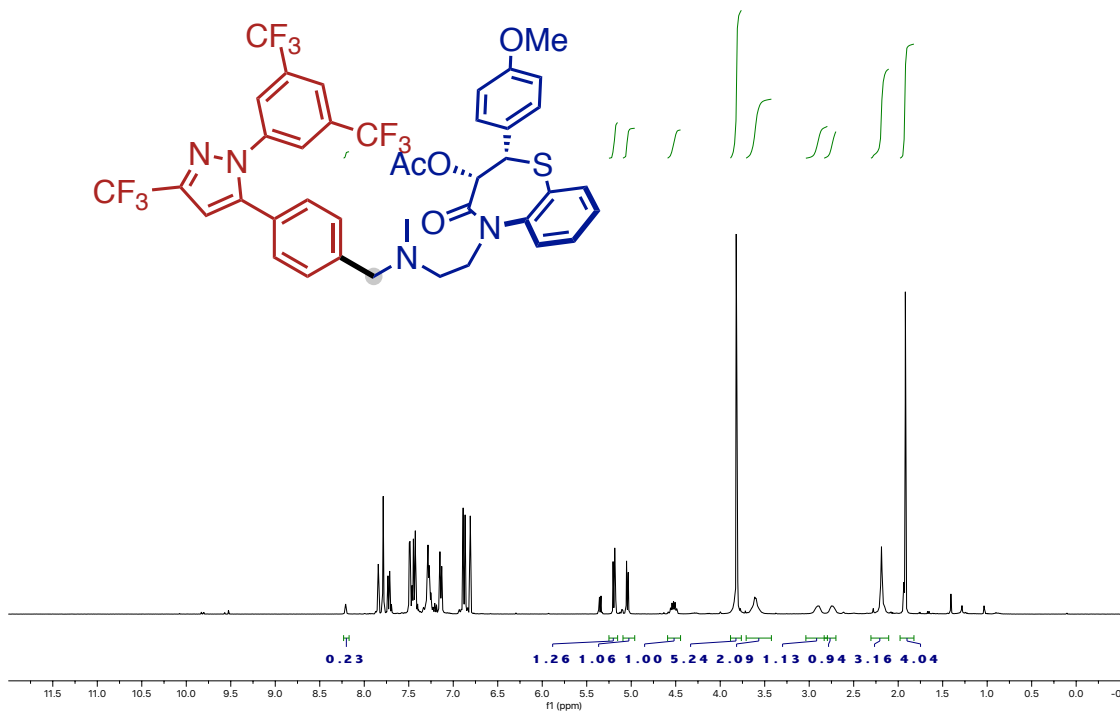

ys-848aa-c13.1.fid

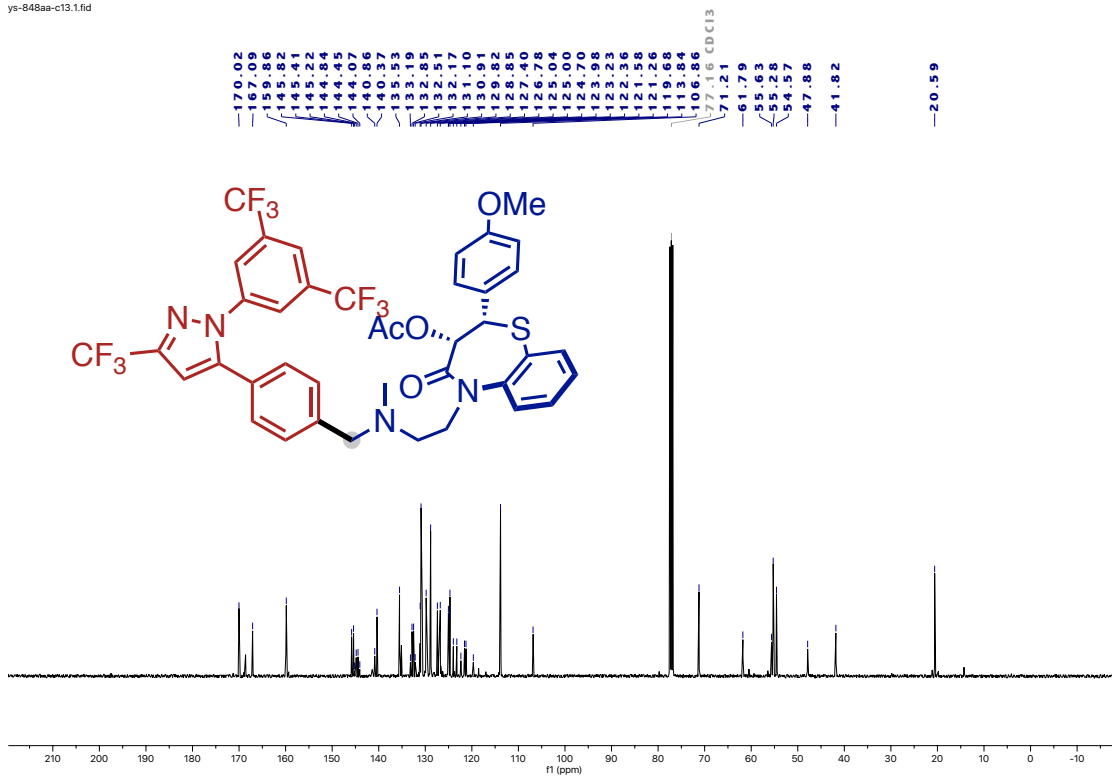

ys-B47aa-1.398.fid  
F19

62.55  
63.16

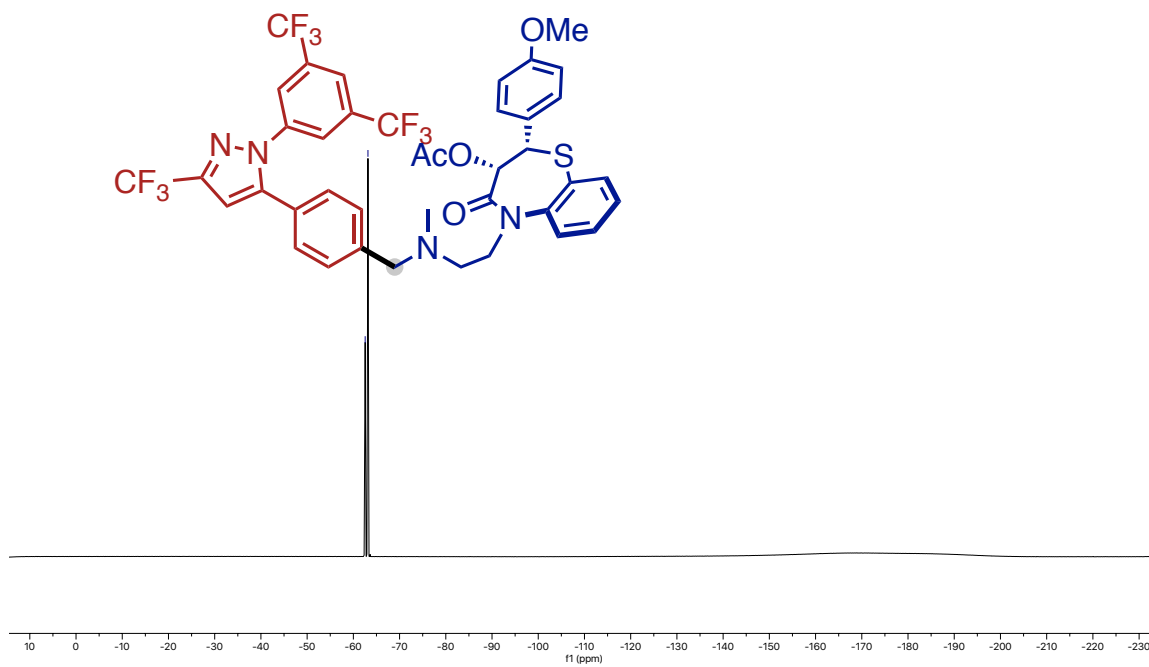



ys-852-a.419.fid

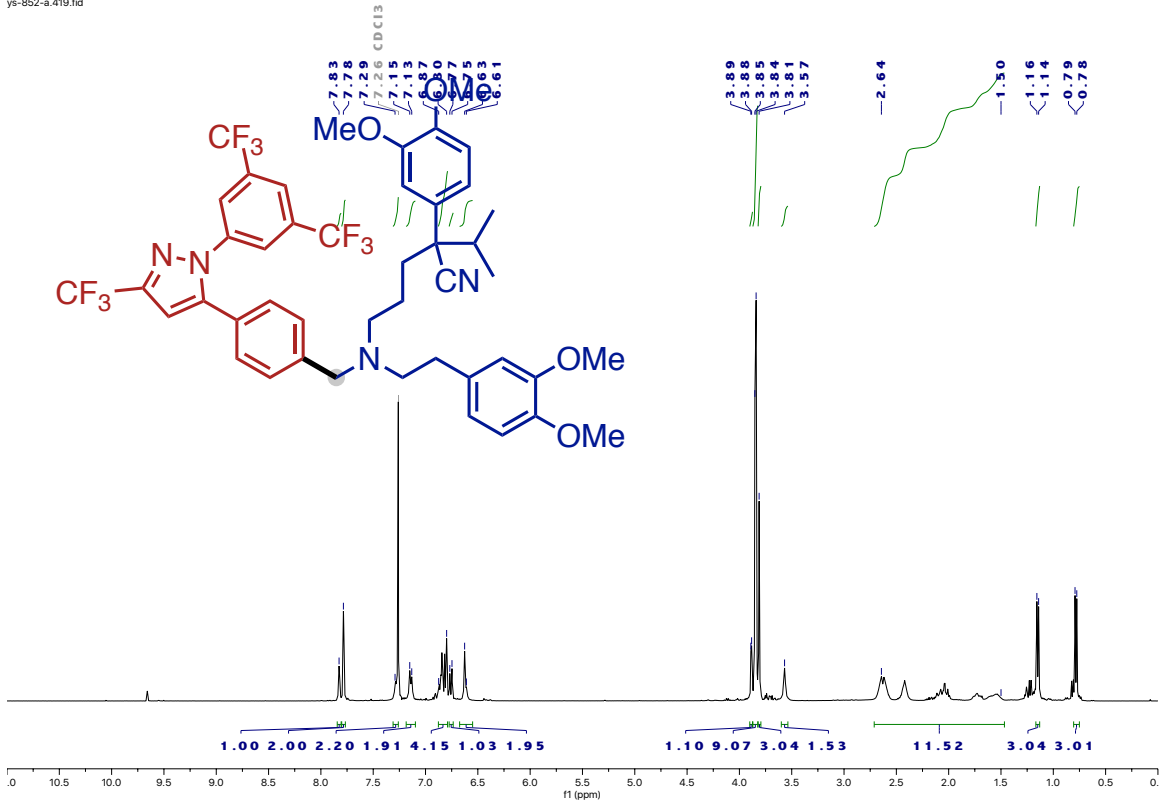

ys-852-a-c13.420.fid  
carbon 13

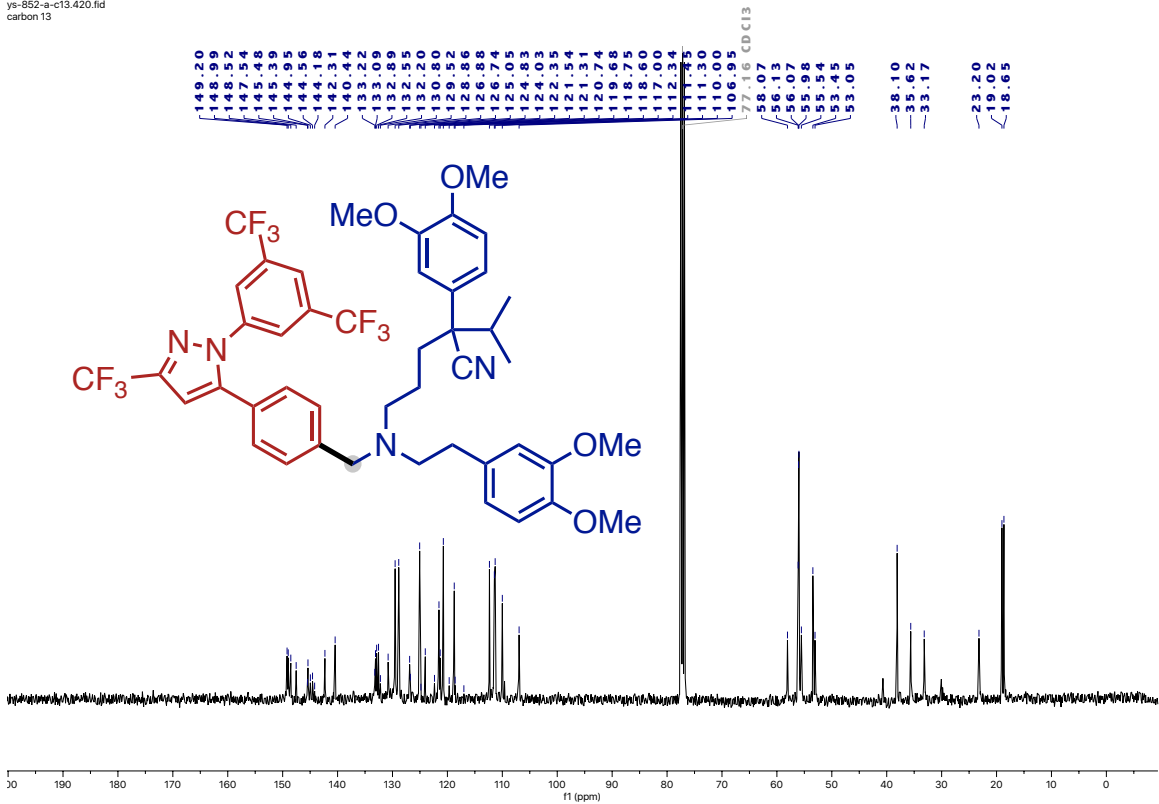

ys-852-a-1.387.fid  
F19

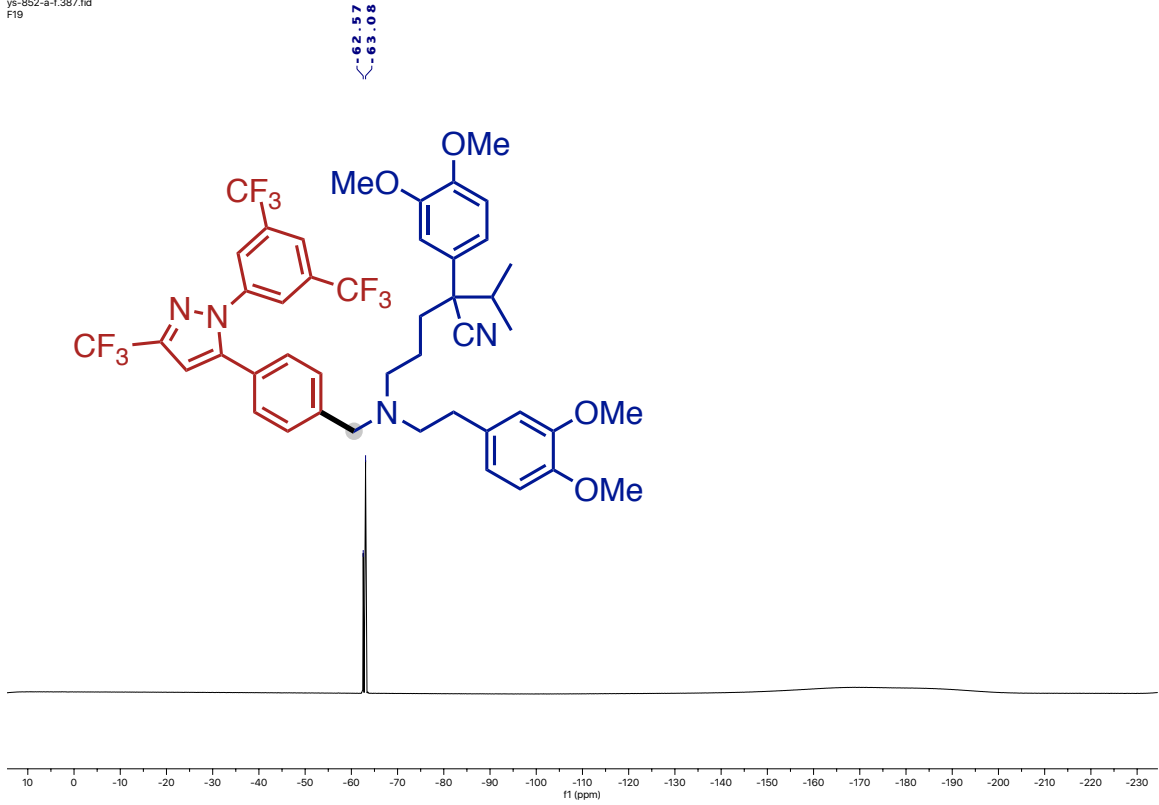

ys-858.1.fid

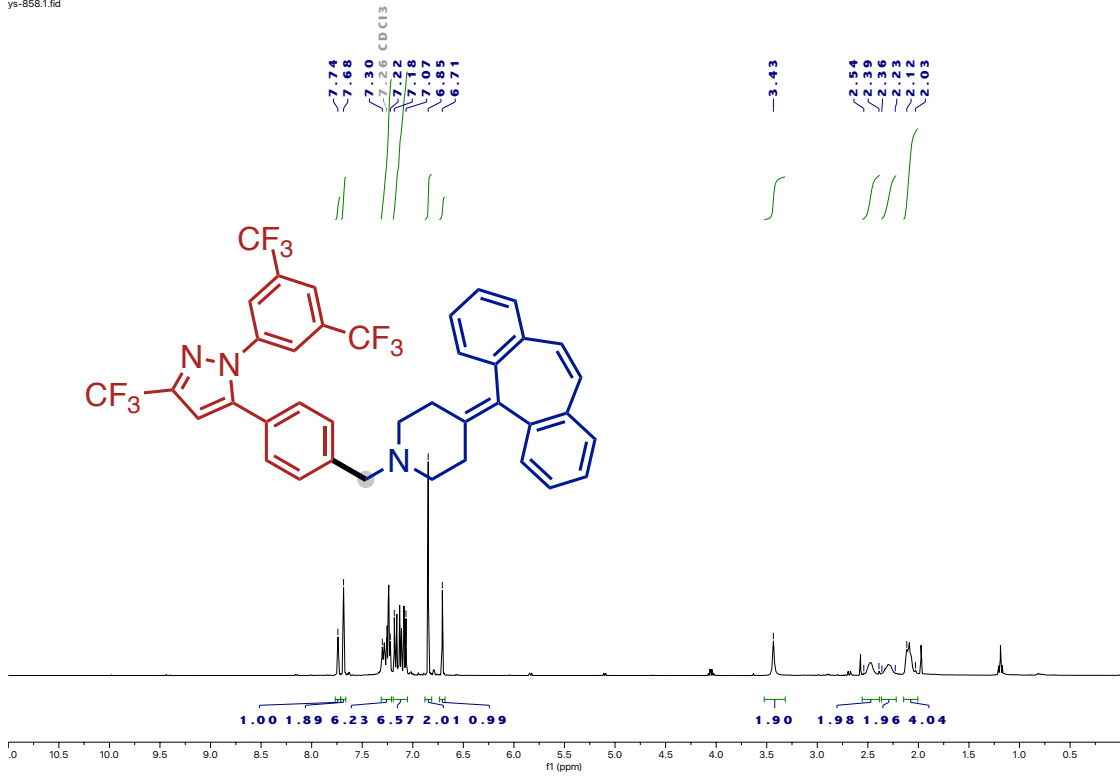

ys-858-c13.393.fid

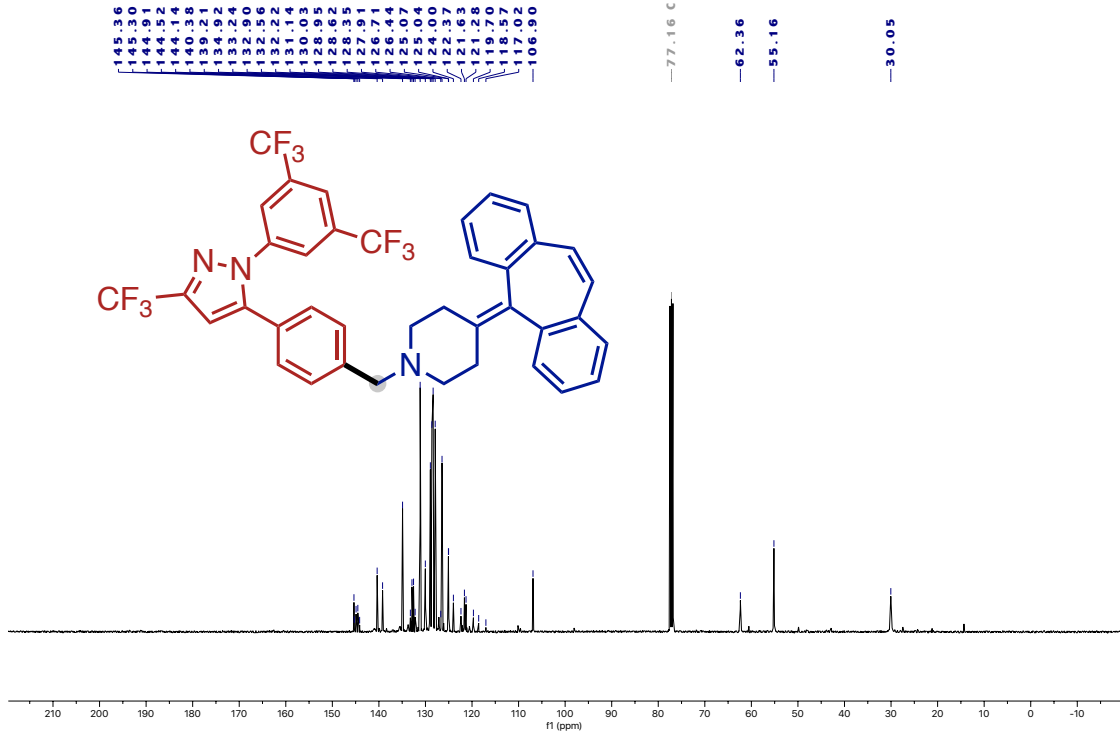

ys-858.3.fid

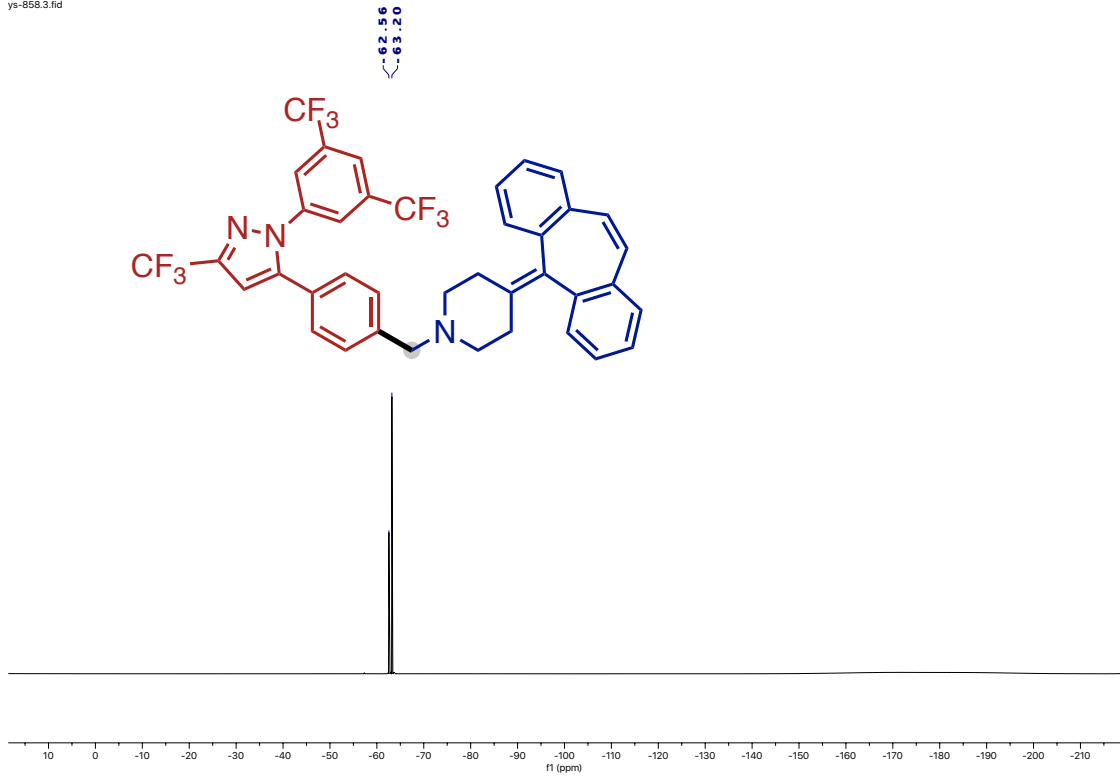

ys-862.423.fid

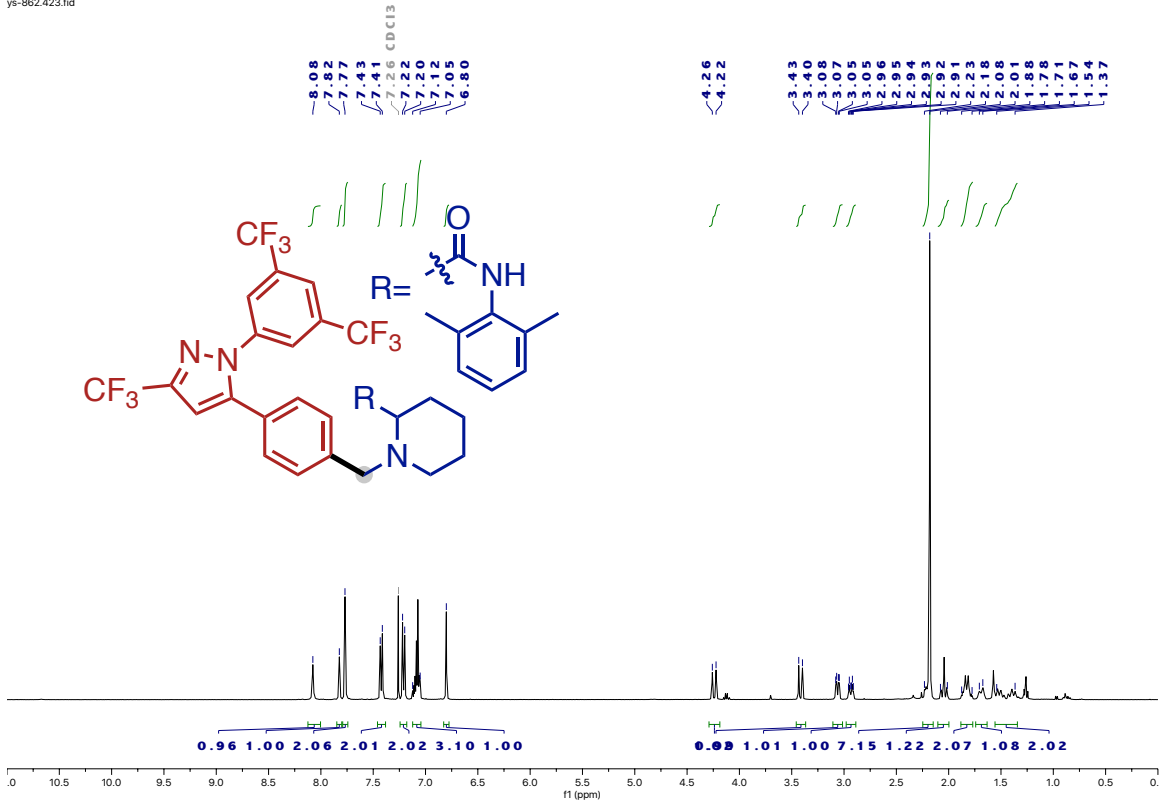

ys-862-c13.386.fid

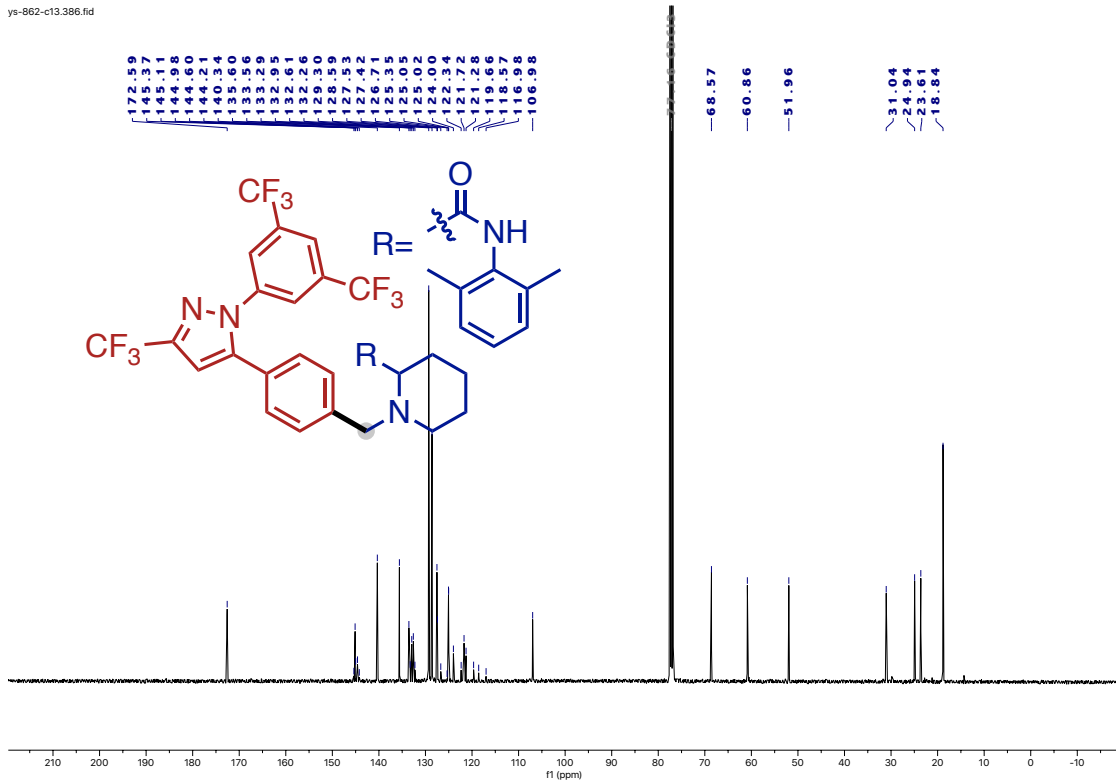

ys-862-1.385.fid  
F10

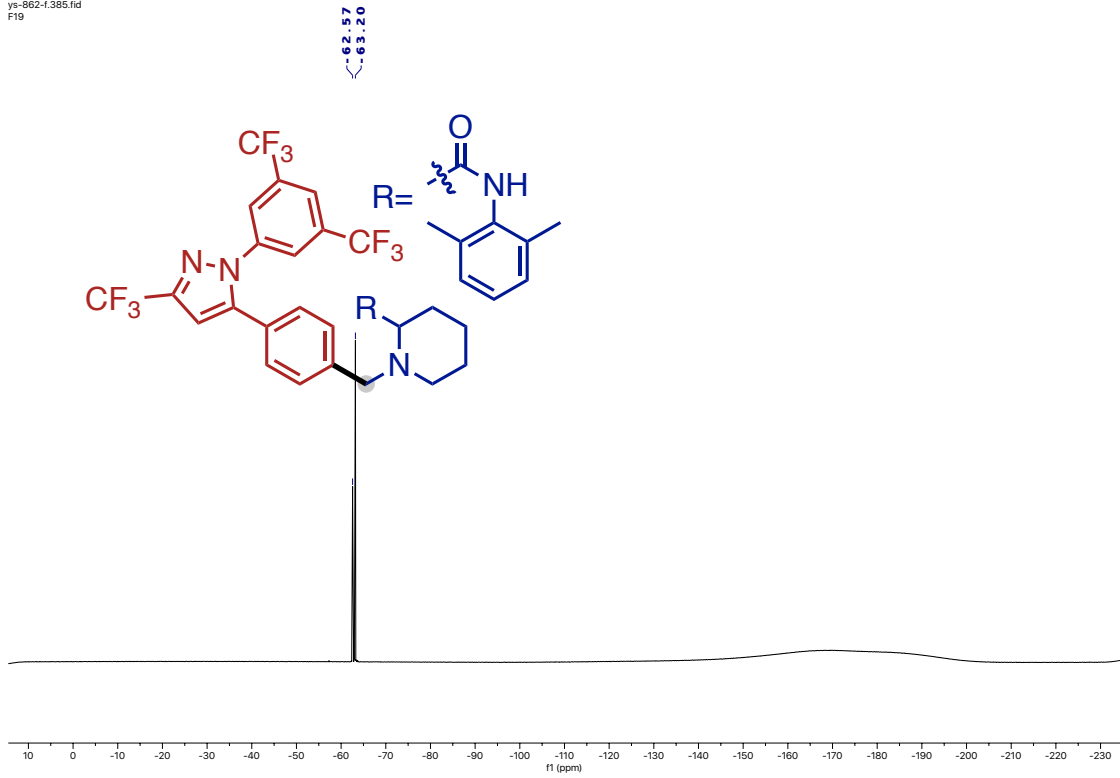

ys-741.290.fid  
proton

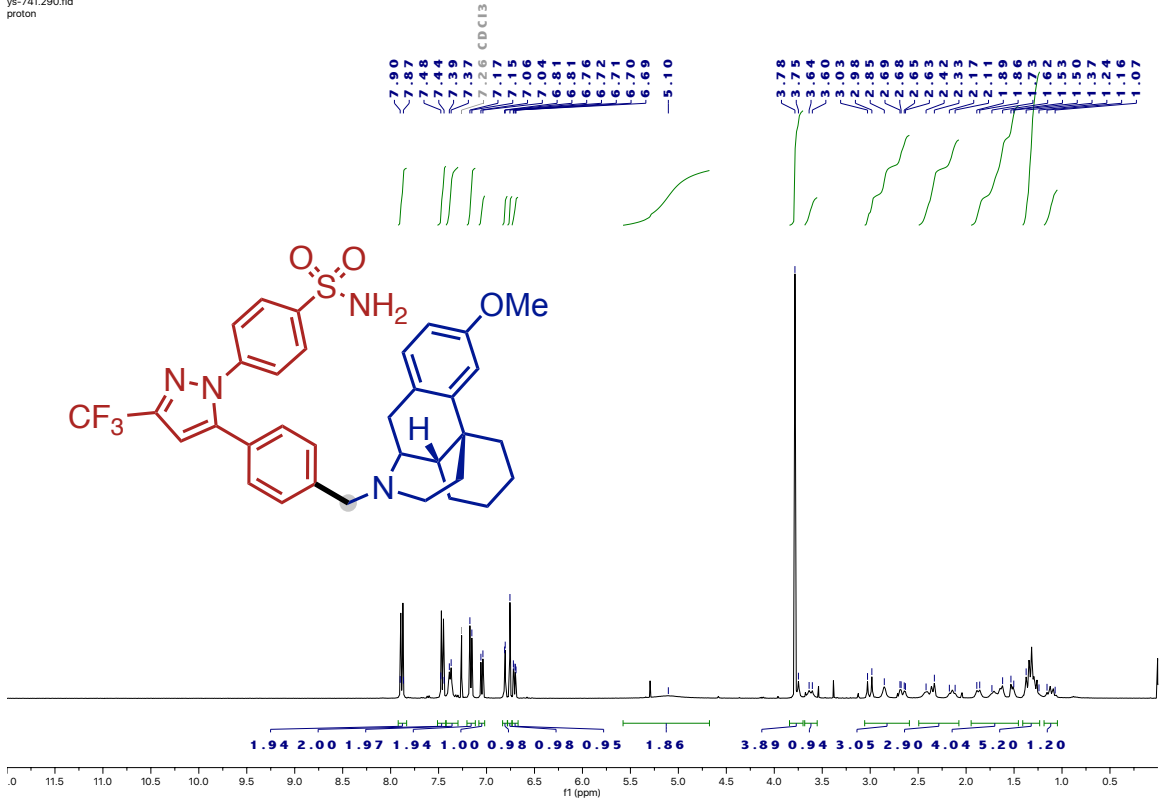

ys-741-f-c13.299.fid

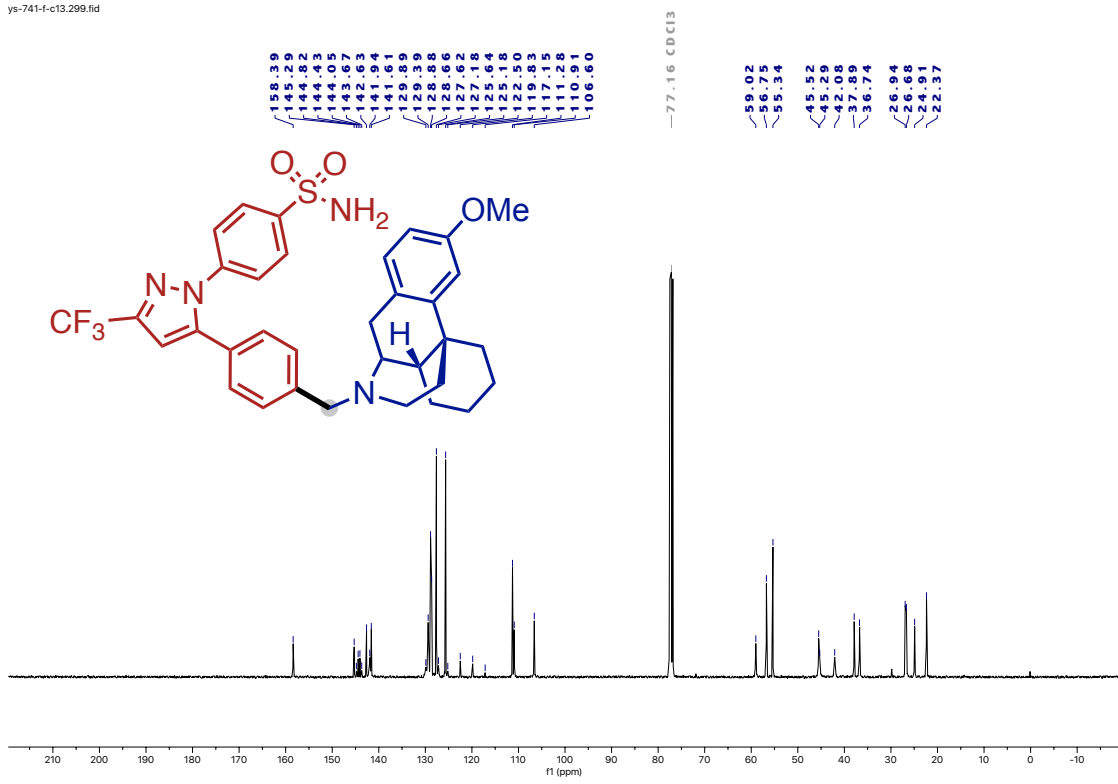

ys-741-f.298.fid  
F19

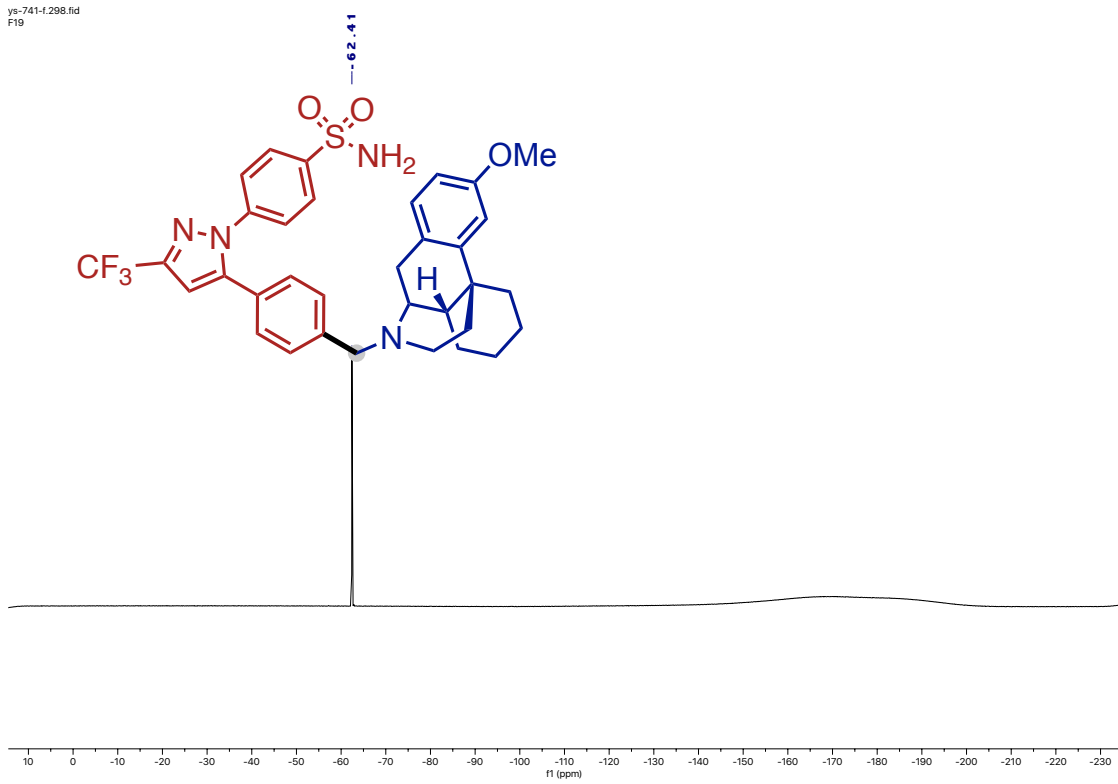

Supplement: NIHMS1778706-supplement-SI.pdf [file NIHMS1778706-supplement-SI.pdf]
